# Supplementary material
Source: PubMed Central journal article supplement (PMC9248156)
Supplement: 13148_2022_1301_MOESM1_ESM.pdf [file 13148_2022_1301_MOESM1_ESM.pdf]

## **Supplementary material**

### **DNA methylation: a potential mediator between air pollution and metabolic syndrome**

Parinaz Poursafa, Zoha Kamali, Eliza Fraszczyk, H. Marike Boezen, Ahmad Vaez, Harold Snieder

**Supplementary Table 1.** Page 2

**Supplementary Table 2.** Page 9

**Supplementary Table 3.** Page 10

**Supplementary Table 1.** Overview of the literature cited.

|                          | Study                | Ethnicity or Country           | Study design/Study population                    | Methods/Tissue                                                                              | Main Findings                                                                                                                                                                                                |
|--------------------------|----------------------|--------------------------------|--------------------------------------------------|---------------------------------------------------------------------------------------------|--------------------------------------------------------------------------------------------------------------------------------------------------------------------------------------------------------------|
| AP and MetS              | Wallwork et al [15]  | Mixed                          | Longitudinal study/587 elderly male participants | –                                                                                           | Men living in areas of worse air quality (PM <sub>2.5</sub> levels) showed increased risk of metabolic dysfunctions.                                                                                         |
|                          | Kelishadi et al [17] | East Asian                     | Cross-sectional study/374 children               | –                                                                                           | Exposure to air pollutants increases the risk of underlying MetS components.                                                                                                                                 |
|                          | Jiang et al [18]     | Chinese                        | Longitudinal/371 participants                    | –                                                                                           | Long-term exposure to traffic-related air pollution may contribute to the development or exacerbation of cardio-metabolic disorders.                                                                         |
|                          | Wei et al [19]       | –                              | Murine study                                     | –                                                                                           | Breathing highly polluted air resulted in weight gain and cardiorespiratory and metabolic dysfunction.                                                                                                       |
|                          | Clementi et al [26]  | USA                            | Review/Firefighters                              | –                                                                                           | Exposure to particulate matter provokes pulmonary and systemic inflammation.                                                                                                                                 |
|                          | Eze et al [27]       | Swiss                          | Cohort/3,769 Adults                              | –                                                                                           | Exposure to ambient air pollutants is independently associated with risk of MetS and related chronic diseases.                                                                                               |
|                          | Brook et al [28]     | China                          | Cross-sectional/65 Adults                        | –                                                                                           | Exposure to ambient air pollutants (PM <sub>2.5</sub> ) is associated with higher blood pressure and insuline resistance.                                                                                    |
|                          | Poursafa et al [29]  | Iran (IR)                      | Nationwide study/1,413 children                  | –                                                                                           | Living in areas with higher air pollution leads to higher levels of MetS components including increased systolic blood pressure, fasting blood glucose, and triglycerides, as well as lower levels of HDL-C. |
|                          | Poursafa et al [30]  | Iran (IR)                      | Cross-sectional/186 children                     | –                                                                                           | Exposure of children to PAHs is significantly associated with triglycerides and fasting blood glucose.                                                                                                       |
| Scinicariello et al [89] | USA                  | Cross-sectional/3,189 children | –                                                | Urinary PAHs were associated with higher BMI, waist circumference, and obesity in children. |                                                                                                                                                                                                              |
|                          | Cantone et al [51]   | Italy                          | Candidate gene/186 obese subjects                | Bisulfite pyrosequencing/Blood                                                              | Daily PM <sub>10</sub> exposure has an inverse association with DNA methylation of inflammatory genes in healthy overweight/obese subjects.                                                                  |

| Study                      | Ethnicity or Country | Study design/Study population                        | Methods/Tissue                                                 | Main Findings                                                                                                                                                                                                                                                         |
|----------------------------|----------------------|------------------------------------------------------|----------------------------------------------------------------|-----------------------------------------------------------------------------------------------------------------------------------------------------------------------------------------------------------------------------------------------------------------------|
| Bind et al [56]            | US Veterans          | Cohort/704 elderly men                               | Bisulfite pyrosequencing/Blood                                 | Traffic-related pollutants showed associations with fibrinogen, C-reactive protein, ICAM-1, and VCAM-1. DNA methylation status modified the effect, indicating a mediatory role for epigenetic states in conveying susceptibility to air pollution.                   |
| Bind et al [57]            | US Veterans          | Longitudinal/777 elderly men                         | Bisulfite pyrosequencing/Blood                                 | Air pollution (including PM <sub>2.5</sub> ) exposure was associated with a left shift in the lower tails of the <i>IFN-γ</i> and <i>ICAM-1</i> methylation distributions.                                                                                            |
| Chi et al [60]             | Mixed                | Cross-sectional/1,207 participants                   | Illumina Infinium HumanMethylation450 BeadChip/Blood monocytes | Long-term PM <sub>2.5</sub> exposure was significantly associated with five candidate CpGs, three of which mRNA expression of nearby genes ( <i>ANKHD1</i> , <i>LGALS2</i> , and <i>ANKRD11</i> ) were also significantly associated with PM <sub>2.5</sub> exposure. |
| Plusquin et al [61]        | UK                   | EWAS/1,235 individuals                               | Illumina InfiniumVR HumanMethylation 450K BeadChip/Cord blood  | PM <sub>10</sub> exposure is associated with locus-specific DNA methylation.                                                                                                                                                                                          |
| Sayols-Baixeras et al [62] | Spain                | EWAS/630 individuals                                 | infinium HumanMethylation450 BeadChip/Blood                    | Air pollution was significantly associated with 81 unique CpGs, the top two which were located in an intergenic region on chromosome 1 and in the <i>LRRC45</i> and <i>PXK</i> genes.                                                                                 |
| Gondaliaa et al [63]       | Mixed                | EWAS/8,397 individuals                               | Illumina 450K Infinium Methylation BeadChip/Blood              | PM was significantly associated with DNA methylation at three CpG sites: <i>MATN4</i> , <i>ARPP21</i> , and <i>CFTR</i> .                                                                                                                                             |
| Rossnerova et al [65]      | Czech Republic       | Cross-sectional/200 children                         | Human Methylation 27K BeadChip/Blood                           | ~36% of CpG sites had significantly different methylation levels. A total of 58 CpGs had >10% lower methylation levels in children from polluted area.                                                                                                                |
| Bellavia et al [67]        | Canada               | Cross-over trial/15 participants                     | Bisulfite PCR-Pyrosequencing/Blood                             | PM <sub>10</sub> was significantly associated with lower methylation at <i>Alu</i> and <i>TLR4</i> , which were in turn associated with higher blood pressure.                                                                                                        |
| Chen et al [68]            | China                | Randomized, double-blind crossover trial/35 students | Bisulfite PCR and pyrosequencing/Blood                         | Short-term exposure to PM <sub>2.5</sub> was associated with rapid global DNA hypomethylation.                                                                                                                                                                        |

|                        | Study                | Ethnicity or Country             | Study design/Study population          | Methods/Tissue                                                          | Main Findings                                                                                                                                                                                                                                                                                                   |
|------------------------|----------------------|----------------------------------|----------------------------------------|-------------------------------------------------------------------------|-----------------------------------------------------------------------------------------------------------------------------------------------------------------------------------------------------------------------------------------------------------------------------------------------------------------|
| AP and DNA methylation | Peng et al [69]      | US Veterans                      | Longitudinal cohort/551 participants   | Bisulfite PCR and pyrosequencing/Blood                                  | Short- and medium-term PM <sub>2.5</sub> were associated with higher fasting blood glucose. Mediation analysis indicated that part of this association was mediated by <i>ICAM-1</i> promoter methylation.                                                                                                      |
|                        | Saenen et al [71]    | Belgium                          | Birth cohort/361 individuals           | Bisulfite-PCR-pyrosequencing/Placenta                                   | PM <sub>2.5</sub> exposure was significantly associated with lower placental <i>LEP</i> methylation.                                                                                                                                                                                                            |
|                        | Salam et al [73]     | Hispanic and non-Hispanic whites | Cohort/940 participants                | Bisulfite PCR and pyrosequencing/Buccal cells                           | Short term PM <sub>2.5</sub> exposure affects inducible nitric oxide synthase (iNOS) methylation.                                                                                                                                                                                                               |
|                        | Tarantini et al [74] | Italy                            | Cross-sectional/63 steel workers       | Bisulfite-pyrosequencing/Blood                                          | Particulate air pollutants were negatively correlated with DNA methylation at <i>NOS3</i> and <i>EDN1</i> . Mediation analysis then confirmed their hypomethylation as intermediate mechanism for PM-related coagulation effects.                                                                               |
|                        | Bind et al [75]      | US Veterans                      | Longitudinal/777 elderly men           | Bisulfite pyrosequencing/Blood                                          | Increase in air pollutants concentrations was significantly associated with <i>F3</i> , <i>ICAM-1</i> , and <i>TLR-2</i> hypomethylation, and <i>IFN-γ</i> and <i>IL-6</i> hypermethylation. Ozone exposures (2-4 weeks) were negatively related to <i>ICAM-1</i> methylation and in turn to its protein level. |
|                        | Chen et al [76]      | China                            | Longitudinal/30 retired COPD patients  | Bisulfite-PCR and pyrosequencing assay/Buccal Samples                   | PM <sub>2.5</sub> exposure and was associated with hypomethylation of <i>NOS2A</i> .                                                                                                                                                                                                                            |
|                        | Shi et al [77]       | -                                | Murine study and in situ investigation | Illumina HumanMethylation450K BeadChip/Human bronchial epithelial cells | PM <sub>2.5</sub> induced genome wide methylome and transcriptome alterations that could be involved in pulmonary toxicity and pathological process of respiratory disease.                                                                                                                                     |
|                        | Tantoh et al [78]    | Taiwanese                        | Cohort/948 participants                | Illumina Infinium MethylationEPIC BeadChip/Blood                        | PM <sub>2.5</sub> and smoking were independently associated with hypomethylation of <i>AHRR</i> and <i>F2LR3</i> .                                                                                                                                                                                              |

| Study                  | Ethnicity or Country        | Study design/Study population                       | Methods/Tissue                                        | Main Findings                                                                                                                                                                                                                                                                                                                     |
|------------------------|-----------------------------|-----------------------------------------------------|-------------------------------------------------------|-----------------------------------------------------------------------------------------------------------------------------------------------------------------------------------------------------------------------------------------------------------------------------------------------------------------------------------|
| Panni et al [79]       | European                    | EWAS/2,956 participants from 3 cohorts              | Illumina 450k BeadChip/Blood                          | Effect of PM <sub>2.5</sub> pollution on DNA methylation at 12 CpG sites ( <i>ACVR2B-AS1</i> , <i>ACYP2</i> , <i>C1orf212</i> , <i>F2</i> , <i>MN1</i> , <i>MSGN1</i> , <i>NEURL4</i> , <i>NSMAF</i> , <i>NXN</i> , <i>SERBP1</i> , <i>TSPYL6</i> , and <i>ZMIZ1</i> ).                                                           |
| Dai et al [80]         | Caucasians                  | EWAS/646 participants                               | Illumina 450k BeadChip/Blood                          | Long-term exposures to some PM <sub>2.5</sub> species (Fe, Ni, V), mostly combustion emitted particles, were associated with alterations in DNA methylation in immune response genes.                                                                                                                                             |
| Lee et al [81]         | Korean                      | EWAS/100 individuals                                | Illumina 450k BeadChip/Blood                          | Long-term NO <sub>2</sub> exposure showed significant associations (FDR<0.05) with 45 CpGs, which were enriched in cardiovascular and respiratory diseases as well as inflammatory and immune responses.                                                                                                                          |
| De Prins [82]          | Belgium                     | Cross-sectional/48 adults                           | HPLC                                                  | Ambient air pollution is associated with lower global DNA methylation.                                                                                                                                                                                                                                                            |
| Xia et al [83]         | China                       | Longitudinal/43 students                            | Bisulfite-PCR and pyrosequencing assay/Blood          | Acute exposure to ambient ozone was associated with higher blood pressure and with increased serum levels of angiotensin-converting enzyme (ACE) and endothelin-1 (ET-1) as biomarkers of blood pressure.                                                                                                                         |
| Jiang et al [85]       | China                       | Longitudinal/40 students                            | Bisulfite-PCR and pyrosequencing assay/Buccal Samples | Short term exposure to NO <sub>2</sub> is associated with DNA methylation of two respiratory function related genes, i.e. arginase ( <i>ARG2</i> ) hypermethylation and inducible nitric oxide synthase ( <i>NOS2A</i> ) hypomethylation.                                                                                         |
| Gruzieva et al [86]    | European and North American | EWAS/1,508 newborns from four birth cohort studies  | Illumina 450k BeadChip/Blood                          | NO <sub>2</sub> exposure during pregnancy showed significant associations (FDR<0.05) with DNA methylation in three CpG sites ( <i>LONP1</i> , <i>HIBADH</i> , and <i>SLC25A28</i> ) of the newborns. NO <sub>2</sub> exposure also showed effects on <i>CAT</i> and <i>TPO</i> methylation as well as on their expression levels. |
| Lichtenfels et al [87] | European                    | EWAS/1,017 subjects from the Lifelines cohort study | Illumina 450k BeadChip/Blood                          | Long-term NO <sub>2</sub> exposure showed significant associations with DNA methylation at seven CpG sites, two of which significantly mediated the association between NO <sub>2</sub> and lung function.                                                                                                                        |
| Abraham et al [88]     | Caucasian                   | EWAS/668 individuals                                | Illumina 450k BeadChip/Placenta                       | NO <sub>2</sub> exposure during the pregnancy showed significant associations (FDR<0.05) with placental DNA methylation of 2 CpGs located in the <i>ADORA2B</i> gene, whose expression is associated with hypoxia and pre-eclampsia.                                                                                              |

|                        | Study                     | Ethnicity or Country | Study design/Study population   | Methods/Tissue                                                           | Main Findings                                                                                                                                                                           |
|------------------------|---------------------------|----------------------|---------------------------------|--------------------------------------------------------------------------|-----------------------------------------------------------------------------------------------------------------------------------------------------------------------------------------|
| AP and DNA methylation | Alegría-Torres et al [90] | México               | Cross-sectional/39 individuals  | Bisulfite-PCR and pyrosequencing assay/Blood                             | PAHs were negatively associated with DNA methylation of the interleukin 12, p53, and TNF- $\alpha$ gene promoters, as well as Alu sequences.                                            |
|                        | Alvarado-Cruz et al [91]  | México               | Cross-sectional/108 individuals | Bisulfite-PCR and pyrosequencing assay/Blood                             | PM <sub>10</sub> exposure is associated with hypermethylation of DNA-repair genes, and <i>LINE1</i> .                                                                                   |
|                        | Herbstman et al [92]      | USA                  | Longitudinal/164 participants   | Methylamp Global DNA Methylation Quantification Kit/Cord blood           | Prenatal PAH exposure was associated with lower global methylation in umbilical cord white blood cells.                                                                                 |
|                        | Kim et al [93]            | Korean               | Cross-sectional/53 women        | Bisulfite treatment and methylation-specific PCR/Visceral adipose tissue | Lipophilic PAHs might contribute to the pathogenesis of insulin resistance through methylation-mediated suppression of the <i>IRS2</i> gene.                                            |
|                        | Lin et al [94]            | China                | Cross-sectional/120 individuals | Illumina 450k BeadChip/Neural tissues                                    | Mean methylation intensity of <i>PAX3</i> gene in fetal neural tissues was positively correlated with concentrations of PAH in maternal serum.                                          |
|                        | Li et al [95]             | Chinese              | Cross-sectional/989 individuals | Illumina 450k BeadChip/Blood                                             | PAHs showed a significant association with an epigenetic predictor of accelerated aging.                                                                                                |
| DNA methylation & MetS | Baccarelli et al [66]     | US Veterans          | Longitudinal/712 individuals    | Bisulfite-PCR and pyrosequencing assay/Blood                             | Individuals with lower <i>LINE-1</i> methylation were at higher risk for incident ischemic heart disease and stroke, and for total mortality.                                           |
|                        | Wang et al [70]           | African-American     | EWAS/112 individuals            | HumanMethylation27 BeadChip from Illumina                                | Differential methylation at <i>SULF1</i> gene was observed and validated in hypertensive versus normotensive individuals.                                                               |
|                        | Godfrey et al [101]       | Caucasian            | Cross-sectional/239 children    | Sequenom MassARRAY/Umbilical cord                                        | Retinoid X receptor- $\alpha$ ( <i>RXR<math>\alpha</math></i> ) and endothelial nitric oxide synthase ( <i>eNOS</i> ) methylation had independent associations with childhood fat mass. |

| Study                  | Ethnicity or Country                     | Study design/Study population             | Methods/Tissue                                                                                  | Main Findings                                                                                                                                                                                                                                                                                         |
|------------------------|------------------------------------------|-------------------------------------------|-------------------------------------------------------------------------------------------------|-------------------------------------------------------------------------------------------------------------------------------------------------------------------------------------------------------------------------------------------------------------------------------------------------------|
| Küpers et al [102]     | Mixed                                    | EWAS/8,825 neonates from 24 birth cohorts | Meta-analysis                                                                                   | DNA methylation in neonatal blood showed genome-wide significant association with birthweight at 914 sites, with a range of -183 to 178g difference in birthweight per 10% increase in methylation.                                                                                                   |
| Luttmer et al [104]    | Netherlands                              | Cross-sectional/738 individuals           | Stable isotope dilution measurement of DNA 5-mc content by positive electrospray LC-MS/MS/Blood | Individuals with the metabolic syndrome had relative DNA hypomethylation compared to participants without the syndrome                                                                                                                                                                                |
| Akinyemiju et al [106] | African-American                         | EWAS/614 individuals                      | Illumina HumanMethylation450K Bead Chip/Blood                                                   | MetS showed consistent association with increased methylation in the <i>ABCG1</i> gene.                                                                                                                                                                                                               |
| Das et al [107]        | European                                 | EWAS/846 participants                     | Illumina HumanMethylation450K Bead Chip/Blood                                                   | Methylation at <i>CPT1A</i> was significantly associated with MetS. This finding was also replicated in African ancestry participants.                                                                                                                                                                |
| Hidalgo et al [108]    | USA                                      | EWAS/837 participants                     | Illumina HumanMethylation450K Bead Chip/Blood                                                   | DNA methylation of <i>ABCG1</i> gene is associated with fasting insulin.                                                                                                                                                                                                                              |
| Kulkarni et al [109]   | Mexican-American                         | EWAS/850 individuals                      | Illumina HumanMethylation450K Bead Chip/Blood                                                   | DNA methylation at CpG sites mapping to three well-characterized genes ( <i>TXNIP</i> , <i>ABCG1</i> and <i>SAMD12</i> ) independently explained 7.8% of the heritability of type 2 diabetes.                                                                                                         |
| Richard et al [110]    | European, African American, and Hispanic | EWAS/17,010 individuals                   | Illumina HumanMethylation450K Bead Chip/Blood                                                   | 31 CpGs showed significant association with blood pressure, 13 of which were independently replicated. Six of the identified CpG sites also showed significant association with gene expression ( <i>TSPAN2</i> , <i>SLC7A11</i> , <i>UNC93B1</i> , <i>CPT1A</i> , <i>PTMS</i> , and <i>LPCAT3</i> ). |

|                          | Study                  | Ethnicity or Country      | Study design/Study population | Methods/Tissue               | Main Findings                                                                                                                                                                                                                                                                                                                                                                                                                                                            |
|--------------------------|------------------------|---------------------------|-------------------------------|------------------------------|--------------------------------------------------------------------------------------------------------------------------------------------------------------------------------------------------------------------------------------------------------------------------------------------------------------------------------------------------------------------------------------------------------------------------------------------------------------------------|
| DNA methylation and MetS | Huang et al [111]      | European and African      | EWAS/4,820 individuals        | Meta-analysis                | 34 CpGs showed significant association with blood pressure. Six of the identified CpG sites also showed significant association (FDR < 0.05) with gene expression ( <i>PHGDH</i> , <i>ABCG1</i> , <i>LMNA</i> , <i>RBPMS2</i> , and <i>SLC1A5</i> ). Further investigation of these CpG sites in a meta-analysis of twin cohorts suggested that the majority of correlation between DNA methylation and blood pressure can be explained by shared environmental factors. |
|                          | Walaszczyk et al [112] | Netherlands               | EWAS/200 individuals          | Illumina 450k BeadChip/Blood | Of the 25 previously reported CpGs for type 2 diabetes, five CpGs (in <i>ABCG1</i> , <i>LOXL2</i> , <i>TXNIP</i> , <i>SLC1A5</i> and <i>SREBF1</i> ) were replicated after adjustment for multiple comparisons.                                                                                                                                                                                                                                                          |
|                          | Demerath et al [113]   | African-American          | EWAS/4,474 individuals        | Illumina 450k BeadChip/Blood | Adiposity traits are associated with DNA methylation at numerous CpG sites that replicate across studies despite variation in tissue type, ethnicity and analytic approaches.                                                                                                                                                                                                                                                                                            |
|                          | Ali et al [114]        | European                  | EWAS/1,244 individuals        | Illumina 450k BeadChip/Blood | DNA methylation at 3 loci ( <i>SOCS3</i> , <i>ZNF771</i> , and <i>LIMD2</i> ), was associated with body mass index, central obesity, fat depots, insulin responsiveness, and plasma lipids. Among these methylation at <i>SOCS3</i> was replicated and also showed gene expression association with MetS.                                                                                                                                                                |
|                          | Wahl et al [115]       | European and Indian Asian | EWAS/5,387 individuals        | Illumina 450k BeadChip/Blood | Body mass index, a key measure of adiposity, is associated with widespread changes in DNA methylation at 187 genetic loci.                                                                                                                                                                                                                                                                                                                                               |
|                          | Wang et al [116]       | African-American          | EWAS/700 individuals          | Illumina 450k BeadChip/Blood | 76 obesity-related CpG sites were identified, 54 of which were validated. Sixteen CpG sites were associated with expression of 17 genes in cis, of which 5 genes displayed differential expression between obese cases and lean controls.                                                                                                                                                                                                                                |

AP: air pollution, MetS: metabolic syndrome, EWAS: epigenome-wide association study, PM: particulate matter, PAHs: polycyclic aromatic hydrocarbons, PCR: polymerase chain reaction.

To generate this list, we searched PubMed database with appropriate keywords:

**AP:** "air pollution", PM, "particulate matter", "Ozone", "NO2", "PAHs", "Polycyclic aromatic hydrocarbons"

**DNA methylation:** "DNA methylation", EWAS

**MetS:** "metabolic syndrome", Obesity, "blood pressure", glucose, triglyceride, HDL

The search was done in late 2020.



**Supplementary Table 2.** Measurement methods of five major air pollutants used for the calculation of the air quality index (AQI) [2].

| <b>Air pollutant</b>                | <b>Measurement Method</b>               | <b>Description</b>                                                                                                                                                              |
|-------------------------------------|-----------------------------------------|---------------------------------------------------------------------------------------------------------------------------------------------------------------------------------|
| Ozone (O <sub>3</sub> )             | - UV Photometric                        | Represents a variation of the ultraviolet (UV) photometric method, known as the “scrubberless” UV (SL-UV) method that specifies removal of O <sub>3</sub> from the sampled air. |
|                                     | - Chemiluminescence                     | Utilizes Nitric Oxide to measure ozone in the atmosphere where the reaction between ambient ozone and NO produce light proportional to the ozone concentration.                 |
| Particulate Matter (PM)             | Beta attenuation monitoring (BAM)       | Absorption of beta radiation by solid particles extracted from air flow.                                                                                                        |
| Carbon Monoxide (CO)                | Nondispersive infrared (NDIR) technique | The NDIR technique is an automated and continuous method that is based on the specific absorption of infrared radiation by the CO molecule.                                     |
| Sulfur Dioxide (SO <sub>2</sub> )   | Ultraviolet fluorescence                | SO <sub>2</sub> molecules absorb UV light and become excited at one wavelength, then decay to a lower energy state emitting UV light at a different wavelength.                 |
| Nitrogen Dioxide (NO <sub>2</sub> ) | Chemiluminescence                       | Measurement of light produced by the gas-phase titration of nitric oxide and ozone.<br><br>NO + O <sub>3</sub> → NO <sub>2</sub> + O <sub>2</sub> + light emission.             |

**Supplementary Table 3.** The intersect of DNA methylation sites associated with air pollution (including PM, Ozone, NO<sub>2</sub>, and PAHs) with those associated with MetS components (Obesity, blood pressure, glucose levels, triglycerides, or HDL-cholesterol). Data was retrieved from the MRC-IEU EWAS Catalog (<http://www.ewascatalog.org>), accessed 01/10/2022, and filtered based on a conservative p-value < 5x10<sup>-8</sup>.

| <b>Gene</b>      | <b>Trait1</b>                                     | <b>minP</b> | <b>Direction</b> | <b>PMID</b>        | <b>Trait2</b>                                                                                                                                                                                                          | <b>minP</b> | <b>Direction</b> | <b>PMID</b>        |
|------------------|---------------------------------------------------|-------------|------------------|--------------------|------------------------------------------------------------------------------------------------------------------------------------------------------------------------------------------------------------------------|-------------|------------------|--------------------|
| <i>LOC283050</i> | Nitrogen dioxide exposure                         | 4.70E-10    | –                | 29410382           | Maternal overweight/obesity                                                                                                                                                                                            | 1.70E-10    | –                | 29016858           |
| <i>RASA3</i>     | Air pollution exposure, Nitrogen dioxide exposure | 4.80E-10    | –                | 26731791, 29410382 | Maternal overweight/obesity, fasting glucose, Triglycerides, Triglycerides to total lipids ratio in large LDL, Triglycerides to total lipids ratio in small HDL, Triglycerides to total lipids ratio in very large HDL | 1.00E-10    | –                | 29016858, 31197173 |
| <i>INPP5A</i>    | Air pollution exposure, Nitrogen dioxide exposure | 4.80E-10    | –                | 26731791, 29410382 | Maternal overweight/obesity, fasting glucose, Ratio of diacylglycerol to triglycerides                                                                                                                                 | 4.00E-10    | –                | 29016858, 31197173 |
| <i>CHD5</i>      | Nitrogen dioxide exposure                         | 4.80E-10    | –                | 29410382           | Maternal overweight/obesity, 1-hour glucose, Ratio of diacylglycerol to triglycerides                                                                                                                                  | 1.60E-09    | –                | 29016858, 33151971 |
| <i>SLC6A1</i>    | Nitrogen dioxide exposure                         | 4.80E-10    | –                | 29410382           | Maternal overweight/obesity                                                                                                                                                                                            | 4.10E-08    | –                | 29016858           |
| <i>BCAR1</i>     | Nitrogen dioxide exposure                         | 5.00E-10    | –                | 29410382           | Maternal overweight/obesity                                                                                                                                                                                            | 6.10E-10    | –                | 29016858           |

| <b>Gene</b>    | <b>Trait1</b>                                     | <b>minP</b> | <b>Direction</b> | <b>PMID</b>        | <b>Trait2</b>                                           | <b>minP</b> | <b>Direction</b> | <b>PMID</b>        |
|----------------|---------------------------------------------------|-------------|------------------|--------------------|---------------------------------------------------------|-------------|------------------|--------------------|
| <i>KLHL29</i>  | Air pollution exposure, Nitrogen dioxide exposure | 5.00E-10    | -                | 26731791, 29410382 | Maternal overweight/obesity                             | 1.90E-09    | -                | 29016858           |
| <i>GPR84</i>   | Nitrogen dioxide exposure                         | 5.00E-10    | -                | 29410382           | Maternal overweight/obesity                             | 2.20E-09    | -                | 29016858           |
| <i>AIRE</i>    | Nitrogen dioxide exposure                         | 5.00E-10    | -                | 29410382           | Maternal overweight/obesity                             | 3.30E-09    | -                | 29016858           |
| <i>ANKRD2</i>  | Nitrogen dioxide exposure                         | 5.00E-10    | -                | 29410382           | Maternal overweight/obesity                             | 4.00E-08    | -                | 29016858           |
| <i>ITGB2</i>   | Nitrogen dioxide exposure                         | 5.10E-10    | +                | 29410382           | Maternal overweight/obesity                             | 2.00E-11    | +                | 29016858           |
| <i>GABBR1</i>  | Air pollution exposure, Nitrogen dioxide exposure | 5.10E-10    | -                | 26731791, 29410382 | Maternal overweight/obesity, Triglycerides in large HDL | 3.90E-11    | -                | 29016858           |
| <i>ZFYVE28</i> | Air pollution exposure, Nitrogen dioxide exposure | 5.10E-10    | -                | 26731791, 29410382 | Maternal overweight/obesity, fasting glucose            | 4.20E-10    | -                | 29016858, 31197173 |
| <i>RTKN</i>    | Nitrogen dioxide exposure                         | 5.10E-10    | -                | 29410382           | Maternal overweight/obesity                             | 1.20E-08    | -                | 29016858           |
| <i>LCE6A</i>   | Nitrogen dioxide exposure                         | 5.10E-10    | -                | 29410382           | Maternal overweight/obesity                             | 1.20E-08    | -                | 29016858           |
| <i>SH3BP2</i>  | Nitrogen dioxide exposure                         | 5.10E-10    | -                | 29410382           | Maternal overweight/obesity                             | 1.40E-08    | -                | 29016858           |
| <i>GPR133</i>  | Nitrogen dioxide exposure                         | 5.10E-10    | -                | 29410382           | Maternal overweight/obesity, Triglycerides in VLDL      | 2.30E-08    | -                | 29016858           |
| <i>C4orf44</i> | Nitrogen dioxide exposure                         | 5.20E-10    | -                | 29410382           | Maternal overweight/obesity                             | 1.60E-09    | -                | 29016858           |

| <b>Gene</b>   | <b>Trait1</b>                                                | <b>minP</b> | <b>Direction</b> | <b>PMID</b>        | <b>Trait2</b>                                                                                                   | <b>minP</b> | <b>Direction</b> | <b>PMID</b>                            |
|---------------|--------------------------------------------------------------|-------------|------------------|--------------------|-----------------------------------------------------------------------------------------------------------------|-------------|------------------|----------------------------------------|
| <i>HIVEP3</i> | Nitrogen dioxide exposure                                    | 5.20E-10    | –                | 29410382           | Maternal overweight/obesity, Diastolic Blood Pressure, Systolic Blood Pressure, fasting glucose, 1-hour glucose | 3.00E-09    | –                | 29016858, 29198723, 31197173, 33151971 |
| <i>VPS37C</i> | Nitrogen dioxide exposure                                    | 5.20E-10    | –                | 29410382           | Maternal overweight/obesity                                                                                     | 1.10E-08    | –                | 29016858                               |
| <i>ERAL1</i>  | Nitrogen dioxide exposure                                    | 5.30E-10    | –                | 29410382           | Maternal overweight/obesity                                                                                     | 9.60E-12    | –                | 29016858                               |
| <i>RNF213</i> | Nitrogen dioxide exposure                                    | 5.30E-10    | –                | 29410382           | Maternal overweight/obesity                                                                                     | 5.60E-10    | –                | 29016858                               |
| <i>DLL4</i>   | Nitrogen dioxide exposure                                    | 5.30E-10    | –                | 29410382           | Maternal overweight/obesity                                                                                     | 2.10E-08    | –                | 29016858                               |
| <i>NOS3</i>   | Nitrogen dioxide exposure                                    | 5.40E-10    | –                | 29410382           | Maternal overweight/obesity                                                                                     | 3.70E-10    | –                | 29016858                               |
| <i>SMYD3</i>  | Air pollution exposure, Nitrogen dioxide exposure            | 5.40E-10    | –                | 26731791, 29410382 | Maternal overweight/obesity                                                                                     | 6.30E-10    | –                | 29016858                               |
| <i>NOTCH4</i> | Nitrogen dioxide exposure, Particulate matter <2.5um (PM2.5) | 5.40E-10    | –                | 29410382, 31148503 | Maternal overweight/obesity, Triglycerides to total lipids ratio in very large HDL                              | 7.70E-10    | –                | 29016858                               |
| <i>ZBTB7C</i> | Nitrogen dioxide exposure                                    | 5.40E-10    | –                | 29410382           | Maternal overweight/obesity                                                                                     | 8.00E-10    | –                | 29016858                               |

| <b>Gene</b>            | <b>Trait1</b>                                     | <b>minP</b> | <b>Direction</b> | <b>PMID</b>        | <b>Trait2</b>                                                                                                                                                        | <b>minP</b> | <b>Direction</b> | <b>PMID</b>        |
|------------------------|---------------------------------------------------|-------------|------------------|--------------------|----------------------------------------------------------------------------------------------------------------------------------------------------------------------|-------------|------------------|--------------------|
| <i>TSNARE1</i>         | Air pollution exposure, Nitrogen dioxide exposure | 5.50E-10    | –                | 26731791, 29410382 | Maternal overweight/obesity, 1-hour glucose, Triglycerides to total lipids ratio in chylomicrons and XXL-VLDL, Triglycerides to total lipids ratio in very large HDL | 8.80E-10    | –                | 29016858, 33151971 |
| <i>SH3BP4</i>          | Nitrogen dioxide exposure                         | 5.50E-10    | –                | 29410382           | Maternal overweight/obesity                                                                                                                                          | 3.50E-09    | –                | 29016858           |
| <i>GALNTL2</i>         | Nitrogen dioxide exposure                         | 5.50E-10    | –                | 29410382           | Maternal overweight/obesity                                                                                                                                          | 3.90E-09    | –                | 29016858           |
| <i>GPC1</i>            | Nitrogen dioxide exposure                         | 5.50E-10    | –                | 29410382           | Maternal overweight/obesity                                                                                                                                          | 8.90E-09    | –                | 29016858           |
| <i>TSPAN9</i>          | Nitrogen dioxide exposure                         | 5.50E-10    | –                | 29410382           | Maternal overweight/obesity                                                                                                                                          | 3.70E-08    | –                | 29016858           |
| <i>CCDC21;SH3BGRL3</i> | Nitrogen dioxide exposure                         | 5.60E-10    | –                | 29410382           | Maternal overweight/obesity                                                                                                                                          | 2.00E-10    | –                | 29016858           |
| <i>DNAJA4</i>          | Nitrogen dioxide exposure                         | 5.60E-10    | –                | 29410382           | Maternal overweight/obesity                                                                                                                                          | 9.90E-10    | –                | 29016858           |
| <i>SPERT</i>           | Nitrogen dioxide exposure                         | 5.60E-10    | –                | 29410382           | Maternal overweight/obesity                                                                                                                                          | 3.10E-09    | –                | 29016858           |
| <i>P2RX3</i>           | Nitrogen dioxide exposure                         | 5.60E-10    | –                | 29410382           | Maternal overweight/obesity                                                                                                                                          | 3.40E-08    | –                | 29016858           |
| <i>ABR</i>             | Air pollution exposure, Nitrogen dioxide exposure | 5.70E-10    | –                | 26731791, 29410382 | Maternal overweight/obesity                                                                                                                                          | 8.70E-12    | –                | 29016858           |

| <b>Gene</b>     | <b>Trait1</b>                                     | <b>minP</b> | <b>Direction</b> | <b>PMID</b>        | <b>Trait2</b>                                                                                                                                      | <b>minP</b> | <b>Direction</b> | <b>PMID</b>                  |
|-----------------|---------------------------------------------------|-------------|------------------|--------------------|----------------------------------------------------------------------------------------------------------------------------------------------------|-------------|------------------|------------------------------|
| <i>PRDM16</i>   | Air pollution exposure, Nitrogen dioxide exposure | 5.70E-10    | –                | 26731791, 29410382 | Maternal overweight/obesity, Diastolic Blood Pressure, Systolic Blood Pressure, fasting glucose, Triglycerides to total lipids ratio in small VLDL | 2.40E-11    | –                | 29016858, 29198723, 31197173 |
| <i>KIAA1026</i> | Air pollution exposure, Nitrogen dioxide exposure | 5.70E-10    | –                | 26731791, 29410382 | Maternal overweight/obesity, fasting glucose                                                                                                       | 1.00E-10    | –                | 29016858, 31197173           |
| <i>SH3PXD2A</i> | Air pollution exposure, Nitrogen dioxide exposure | 5.70E-10    | –                | 26731791, 29410382 | Maternal overweight/obesity                                                                                                                        | 5.70E-10    | –                | 29016858                     |
| <i>TRIM26</i>   | Air pollution exposure, Nitrogen dioxide exposure | 5.70E-10    | –                | 26731791, 29410382 | Maternal overweight/obesity, Triglycerides, Ratio of triglycerides to phosphoglycerides                                                            | 9.30E-10    | –                | 29016858, 31910897           |
| <i>NOTCH1</i>   | Nitrogen dioxide exposure                         | 5.70E-10    | –                | 29410382           | Maternal overweight/obesity                                                                                                                        | 8.40E-09    | –                | 29016858                     |
| <i>RILP</i>     | Nitrogen dioxide exposure                         | 5.80E-10    | –                | 29410382           | Maternal overweight/obesity, Serum total triglycerides, Triglycerides in HDL, Triglycerides in medium HDL, Triglycerides in VLDL                   | 9.80E-10    | –                | 29016858                     |
| <i>SLC8A1</i>   | Nitrogen dioxide exposure                         | 5.80E-10    | –                | 29410382           | Maternal overweight/obesity                                                                                                                        | 2.30E-09    | –                | 29016858                     |

| <b>Gene</b>    | <b>Trait1</b>                                     | <b>minP</b> | <b>Direction</b> | <b>PMID</b>        | <b>Trait2</b>                                                                      | <b>minP</b> | <b>Direction</b> | <b>PMID</b>        |
|----------------|---------------------------------------------------|-------------|------------------|--------------------|------------------------------------------------------------------------------------|-------------|------------------|--------------------|
| <i>ABHD6</i>   | Nitrogen dioxide exposure                         | 5.80E-10    | –                | 29410382           | Maternal overweight/obesity                                                        | 1.30E-08    | –                | 29016858           |
| <i>PTPRN2</i>  | Air pollution exposure, Nitrogen dioxide exposure | 5.90E-10    | –                | 26731791, 29410382 | Maternal overweight/obesity                                                        | 2.00E-12    | –                | 29016858           |
| <i>WNT2B</i>   | Air pollution exposure, Nitrogen dioxide exposure | 5.90E-10    | –                | 26731791, 29410382 | Maternal overweight/obesity                                                        | 4.60E-10    | –                | 29016858           |
| <i>TSSC1</i>   | Air pollution exposure, Nitrogen dioxide exposure | 5.90E-10    | –                | 26731791, 29410382 | Maternal overweight/obesity, fasting glucose                                       | 5.90E-10    | –                | 29016858, 31197173 |
| <i>ROR1</i>    | Nitrogen dioxide exposure                         | 5.90E-10    | –                | 29410382           | Maternal overweight/obesity                                                        | 1.30E-08    | –                | 29016858           |
| <i>HEPACAM</i> | Nitrogen dioxide exposure                         | 5.90E-10    | –                | 29410382           | Maternal overweight/obesity                                                        | 2.10E-08    | –                | 29016858           |
| <i>RASGRF2</i> | Air pollution exposure, Nitrogen dioxide exposure | 5.90E-10    | –                | 26731791, 29410382 | Maternal overweight/obesity                                                        | 2.90E-08    | –                | 29016858           |
| <i>CABP1</i>   | Nitrogen dioxide exposure                         | 6.00E-10    | –                | 29410382           | Maternal overweight/obesity                                                        | 2.20E-10    | –                | 29016858           |
| <i>DAPK1</i>   | Nitrogen dioxide exposure                         | 6.00E-10    | –                | 29410382           | Maternal overweight/obesity, Triglycerides to total lipids ratio in very large HDL | 2.80E-09    | –                | 29016858           |
| <i>COL11A2</i> | Air pollution exposure, Nitrogen dioxide exposure | 6.00E-10    | –                | 26731791, 29410382 | Maternal overweight/obesity                                                        | 3.40E-09    | –                | 29016858           |
| <i>FABP6</i>   | Nitrogen dioxide exposure                         | 6.00E-10    | –                | 29410382           | Maternal overweight/obesity                                                        | 2.60E-08    | –                | 29016858           |
| <i>TMEM38A</i> | Nitrogen dioxide exposure                         | 6.10E-10    | –                | 29410382           | Maternal overweight/obesity                                                        | 2.10E-08    | –                | 29016858           |

| <b>Gene</b>     | <b>Trait1</b>                                     | <b>minP</b> | <b>Direction</b> | <b>PMID</b>        | <b>Trait2</b>                                                                       | <b>minP</b> | <b>Direction</b> | <b>PMID</b>        |
|-----------------|---------------------------------------------------|-------------|------------------|--------------------|-------------------------------------------------------------------------------------|-------------|------------------|--------------------|
| <i>KIRREL3</i>  | Nitrogen dioxide exposure                         | 6.30E-10    | –                | 29410382           | Maternal overweight/obesity                                                         | 1.30E-10    | –                | 29016858           |
| <i>SEMA6A</i>   | Air pollution exposure, Nitrogen dioxide exposure | 6.30E-10    | –                | 26731791, 29410382 | Maternal overweight/obesity, 1-hour glucose                                         | 5.90E-10    | –                | 29016858, 33151971 |
| <i>SPTBN1</i>   | Air pollution exposure, Nitrogen dioxide exposure | 6.30E-10    | –                | 26731791, 29410382 | Maternal overweight/obesity, Triglycerides to total lipids ratio in medium VLDL     | 1.80E-09    | –                | 29016858           |
| <i>EPHA2</i>    | Nitrogen dioxide exposure                         | 6.40E-10    | –                | 29410382           | Maternal overweight/obesity, Triglycerides in chylomicrons and extremely large VLDL | 1.60E-13    | –                | 29016858           |
| <i>CACNA2D3</i> | Nitrogen dioxide exposure                         | 6.50E-10    | –                | 29410382           | Maternal overweight/obesity                                                         | 3.40E-09    | –                | 29016858           |
| <i>ART1</i>     | Nitrogen dioxide exposure                         | 6.50E-10    | –                | 29410382           | Maternal overweight/obesity                                                         | 4.20E-08    | –                | 29016858           |
| <i>LDB2</i>     | Nitrogen dioxide exposure                         | 6.60E-10    | –                | 29410382           | Maternal overweight/obesity                                                         | 6.30E-12    | –                | 29016858           |
| <i>MCF2L</i>    | Air pollution exposure, Nitrogen dioxide exposure | 6.60E-10    | –                | 26731791, 29410382 | Maternal overweight/obesity                                                         | 3.10E-10    | –                | 29016858           |
| <i>RD3</i>      | Nitrogen dioxide exposure                         | 6.60E-10    | –                | 29410382           | Maternal overweight/obesity                                                         | 2.90E-09    | –                | 29016858           |
| <i>CHRNA7</i>   | Nitrogen dioxide exposure                         | 6.60E-10    | –                | 29410382           | Maternal overweight/obesity, 1-hour glucose                                         | 3.20E-09    | –                | 29016858, 33151971 |



| <b>Gene</b>     | <b>Trait1</b>                                     | <b>minP</b> | <b>Direction</b> | <b>PMID</b>        | <b>Trait2</b>                                                                                                                | <b>minP</b> | <b>Direction</b> | <b>PMID</b>                  |
|-----------------|---------------------------------------------------|-------------|------------------|--------------------|------------------------------------------------------------------------------------------------------------------------------|-------------|------------------|------------------------------|
| <i>CDC42BPB</i> | Nitrogen dioxide exposure                         | 6.60E-10    | -                | 29410382           | Maternal overweight/obesity, Systolic Blood Pressure, 1-hour glucose, Triglycerides in chylomicrons and extremely large VLDL | 4.60E-09    | -                | 29016858, 32520614, 33151971 |
| <i>CLCN1</i>    | Nitrogen dioxide exposure                         | 6.70E-10    | -                | 29410382           | Maternal overweight/obesity                                                                                                  | 2.80E-10    | -                | 29016858                     |
| <i>ABCA4</i>    | Nitrogen dioxide exposure                         | 6.80E-10    | -                | 29410382           | Maternal overweight/obesity, fasting glucose                                                                                 | 2.30E-11    | -                | 29016858, 31197173           |
| <i>C6orf25</i>  | Nitrogen dioxide exposure                         | 6.80E-10    | -                | 29410382           | Maternal overweight/obesity                                                                                                  | 4.80E-10    | -                | 29016858                     |
| <i>LPCAT1</i>   | Nitrogen dioxide exposure                         | 6.80E-10    | -                | 29410382           | Maternal overweight/obesity                                                                                                  | 9.40E-10    | -                | 29016858                     |
| <i>CASP9</i>    | Nitrogen dioxide exposure                         | 6.80E-10    | -                | 29410382           | Maternal overweight/obesity                                                                                                  | 8.20E-09    | -                | 29016858                     |
| <i>ZAP70</i>    | Nitrogen dioxide exposure                         | 6.80E-10    | -                | 29410382           | Maternal overweight/obesity, fasting glucose                                                                                 | 3.50E-08    | -                | 29016858, 31197173           |
| <i>FRMD1</i>    | Nitrogen dioxide exposure                         | 6.90E-10    | -                | 29410382           | Maternal overweight/obesity                                                                                                  | 5.30E-10    | -                | 29016858                     |
| <i>COL6A3</i>   | Nitrogen dioxide exposure                         | 7.00E-10    | -                | 29410382           | Maternal overweight/obesity                                                                                                  | 1.40E-10    | -                | 29016858                     |
| <i>KCNAB2</i>   | Air pollution exposure, Nitrogen dioxide exposure | 7.00E-10    | -                | 26731791, 29410382 | Maternal overweight/obesity                                                                                                  | 1.90E-09    | -                | 29016858                     |
| <i>DEGS1</i>    | Nitrogen dioxide exposure                         | 7.00E-10    | +                | 29410382           | Maternal overweight/obesity                                                                                                  | 5.80E-09    | +                | 29016858                     |

| <b>Gene</b>     | <b>Trait1</b>                                     | <b>minP</b> | <b>Direction</b> | <b>PMID</b>        | <b>Trait2</b>                                | <b>minP</b> | <b>Direction</b> | <b>PMID</b>        |
|-----------------|---------------------------------------------------|-------------|------------------|--------------------|----------------------------------------------|-------------|------------------|--------------------|
| <i>PLEKHG3</i>  | Nitrogen dioxide exposure                         | 7.00E-10    | –                | 29410382           | Maternal overweight/obesity, fasting glucose | 8.90E-09    | –                | 29016858, 31197173 |
| <i>MEGF8</i>    | Nitrogen dioxide exposure                         | 7.00E-10    | –                | 29410382           | Maternal overweight/obesity                  | 1.20E-08    | –                | 29016858           |
| <i>CTRB2</i>    | Nitrogen dioxide exposure                         | 7.10E-10    | –                | 29410382           | Maternal overweight/obesity                  | 2.10E-09    | –                | 29016858           |
| <i>PDZRN3</i>   | Air pollution exposure, Nitrogen dioxide exposure | 7.10E-10    | –                | 26731791, 29410382 | Maternal overweight/obesity                  | 8.40E-09    | –                | 29016858           |
| <i>CAPN5</i>    | Nitrogen dioxide exposure                         | 7.10E-10    | –                | 29410382           | Maternal overweight/obesity                  | 3.40E-08    | –                | 29016858           |
| <i>PSORS1C1</i> | Nitrogen dioxide exposure                         | 7.20E-10    | –                | 29410382           | Maternal overweight/obesity                  | 2.00E-09    | –                | 29016858           |
| <i>PDGFRB</i>   | Nitrogen dioxide exposure                         | 7.20E-10    | –                | 29410382           | Maternal overweight/obesity                  | 5.60E-09    | –                | 29016858           |
| <i>NTN1</i>     | Nitrogen dioxide exposure                         | 7.20E-10    | –                | 29410382           | Maternal overweight/obesity                  | 9.00E-09    | –                | 29016858           |
| <i>B4GALNT3</i> | Nitrogen dioxide exposure                         | 7.20E-10    | –                | 29410382           | Maternal overweight/obesity                  | 1.60E-08    | –                | 29016858           |
| <i>TRIM29</i>   | Nitrogen dioxide exposure                         | 7.20E-10    | –                | 29410382           | Maternal overweight/obesity                  | 3.70E-08    | –                | 29016858           |
| <i>ADAM11</i>   | Nitrogen dioxide exposure                         | 7.20E-10    | –                | 29410382           | Maternal overweight/obesity                  | 4.50E-08    | –                | 29016858           |
| <i>MICAL2</i>   | Nitrogen dioxide exposure                         | 7.30E-10    | –                | 29410382           | Maternal overweight/obesity                  | 7.50E-11    | –                | 29016858           |
| <i>SHANK2</i>   | Nitrogen dioxide exposure                         | 7.30E-10    | –                | 29410382           | Maternal overweight/obesity                  | 7.20E-10    | –                | 29016858           |
| <i>RPH3A</i>    | Air pollution exposure, Nitrogen dioxide exposure | 7.30E-10    | –                | 26731791, 29410382 | Maternal overweight/obesity                  | 2.70E-09    | –                | 29016858           |

| <b>Gene</b>       | <b>Trait1</b>                                     | <b>minP</b> | <b>Direction</b> | <b>PMID</b>        | <b>Trait2</b>                                                                                                                        | <b>minP</b> | <b>Direction</b> | <b>PMID</b>        |
|-------------------|---------------------------------------------------|-------------|------------------|--------------------|--------------------------------------------------------------------------------------------------------------------------------------|-------------|------------------|--------------------|
| <i>DIP2C</i>      | Nitrogen dioxide exposure                         | 7.40E-10    | -                | 29410382           | Maternal overweight/obesity, Triglycerides, Glucose, Triglycerides in medium HDL, Triglycerides to total lipids ratio in medium VLDL | 3.20E-12    | -                | 29016858, 31910897 |
| <i>RAPGEF4</i>    | Nitrogen dioxide exposure                         | 7.40E-10    | -                | 29410382           | Maternal overweight/obesity                                                                                                          | 1.10E-09    | -                | 29016858           |
| <i>BAHCC1</i>     | Nitrogen dioxide exposure                         | 7.40E-10    | +                | 29410382           | Maternal overweight/obesity, fasting glucose                                                                                         | 1.40E-09    | -                | 29016858, 31197173 |
| <i>PPT2;PRRT1</i> | Nitrogen dioxide exposure                         | 7.50E-10    | -                | 29410382           | Maternal overweight/obesity                                                                                                          | 4.30E-11    | -                | 29016858           |
| <i>ZFPM1</i>      | Air pollution exposure, Nitrogen dioxide exposure | 7.50E-10    | -                | 26731791, 29410382 | Maternal overweight/obesity                                                                                                          | 9.40E-10    | -                | 29016858           |
| <i>RPS6KA2</i>    | Nitrogen dioxide exposure                         | 7.50E-10    | -                | 29410382           | Serum triglycerides, Maternal overweight/obesity, Triglycerides to total lipids ratio in large HDL                                   | 2.10E-09    | -                | 28213390, 29016858 |
| <i>ALDOC</i>      | Nitrogen dioxide exposure                         | 7.60E-10    | -                | 29410382           | Maternal overweight/obesity                                                                                                          | 3.20E-10    | -                | 29016858           |
| <i>TEX101</i>     | Nitrogen dioxide exposure                         | 7.60E-10    | -                | 29410382           | Maternal overweight/obesity                                                                                                          | 6.20E-10    | -                | 29016858           |
| <i>TRPM8</i>      | Nitrogen dioxide exposure                         | 7.60E-10    | -                | 29410382           | Maternal overweight/obesity                                                                                                          | 1.50E-08    | -                | 29016858           |
| <i>MFSD10</i>     | Nitrogen dioxide exposure                         | 7.60E-10    | +                | 29410382           | Maternal overweight/obesity                                                                                                          | 3.10E-08    | +                | 29016858           |

| <b>Gene</b>     | <b>Trait1</b>                                                                       | <b>minP</b> | <b>Direction</b> | <b>PMID</b>                  | <b>Trait2</b>                                                                                                                                                                  | <b>minP</b> | <b>Direction</b> | <b>PMID</b>                  |
|-----------------|-------------------------------------------------------------------------------------|-------------|------------------|------------------------------|--------------------------------------------------------------------------------------------------------------------------------------------------------------------------------|-------------|------------------|------------------------------|
| <i>KLHL30</i>   | Nitrogen dioxide exposure                                                           | 7.70E-10    | -                | 29410382                     | Maternal overweight/obesity                                                                                                                                                    | 7.50E-10    | -                | 29016858                     |
| <i>CORO1A</i>   | Nitrogen dioxide exposure                                                           | 7.70E-10    | +                | 29410382                     | Maternal overweight/obesity, Triglycerides in small LDL, Triglycerides to total lipids ratio in small LDL                                                                      | 7.80E-10    | +                | 29016858                     |
| <i>NPTX2</i>    | Air pollution exposure, Nitrogen dioxide exposure                                   | 7.70E-10    | -                | 26731791, 29410382           | Maternal overweight/obesity                                                                                                                                                    | 1.90E-09    | -                | 29016858                     |
| <i>MAD1L1</i>   | Air pollution exposure, Nitrogen dioxide exposure, Particulate matter air pollution | 7.80E-10    | -                | 26731791, 29410382, 32484729 | Maternal overweight/obesity, fasting glucose, 1-hour glucose, 2-hour glucose, Ratio of diacylglycerol to triglycerides, Triglycerides in large HDL, Triglycerides in small LDL | 1.40E-11    | -                | 29016858, 31197173, 33151971 |
| <i>AGRN</i>     | Air pollution exposure, Nitrogen dioxide exposure                                   | 7.80E-10    | -                | 26731791, 29410382           | Maternal overweight/obesity                                                                                                                                                    | 1.70E-11    | -                | 29016858                     |
| <i>KIAA0802</i> | Nitrogen dioxide exposure                                                           | 7.80E-10    | -                | 29410382                     | Maternal overweight/obesity                                                                                                                                                    | 1.60E-09    | -                | 29016858                     |
| <i>PDE2A</i>    | Air pollution exposure, Nitrogen dioxide exposure                                   | 7.80E-10    | -                | 26731791, 29410382           | Maternal overweight/obesity, 1-hour glucose                                                                                                                                    | 2.80E-09    | -                | 29016858, 33151971           |

| <b>Gene</b>                   | <b>Trait1</b>                                     | <b>minP</b> | <b>Direction</b> | <b>PMID</b>        | <b>Trait2</b>                                                                                                                                                                                                                                                                          | <b>minP</b> | <b>Direction</b> | <b>PMID</b> |
|-------------------------------|---------------------------------------------------|-------------|------------------|--------------------|----------------------------------------------------------------------------------------------------------------------------------------------------------------------------------------------------------------------------------------------------------------------------------------|-------------|------------------|-------------|
| <i>FAM53A</i>                 | Nitrogen dioxide exposure                         | 7.80E-10    | -                | 29410382           | Maternal overweight/obesity, Ratio of triglycerides to phosphoglycerides, Triglycerides to total lipids ratio in large HDL, Triglycerides to total lipids ratio in medium HDL, Triglycerides to total lipids ratio in small HDL, Triglycerides to total lipids ratio in very large HDL | 4.70E-09    | -                | 29016858    |
| <i>APOA4</i>                  | Air pollution exposure, Nitrogen dioxide exposure | 7.80E-10    | -                | 26731791, 29410382 | Maternal overweight/obesity                                                                                                                                                                                                                                                            | 8.00E-09    | -                | 29016858    |
| <i>HLA-DQB2</i>               | Nitrogen dioxide exposure                         | 7.80E-10    | -                | 29410382           | Maternal overweight/obesity                                                                                                                                                                                                                                                            | 3.00E-08    | -                | 29016858    |
| <i>FYB</i>                    | Nitrogen dioxide exposure                         | 7.90E-10    | +                | 29410382           | Maternal overweight/obesity                                                                                                                                                                                                                                                            | 9.60E-13    | +                | 29016858    |
| <i>FZD3</i>                   | Nitrogen dioxide exposure                         | 7.90E-10    | -                | 29410382           | Maternal overweight/obesity                                                                                                                                                                                                                                                            | 5.80E-09    | -                | 29016858    |
| <i>CD80</i>                   | Nitrogen dioxide exposure                         | 7.90E-10    | -                | 29410382           | Maternal overweight/obesity                                                                                                                                                                                                                                                            | 1.60E-08    | -                | 29016858    |
| <i>PSORS1C1;P<br/>SORS1C2</i> | Nitrogen dioxide exposure                         | 7.90E-10    | -                | 29410382           | Maternal overweight/obesity                                                                                                                                                                                                                                                            | 1.80E-08    | -                | 29016858    |
| <i>ANKRD9</i>                 | Nitrogen dioxide exposure                         | 7.90E-10    | -                | 29410382           | Maternal overweight/obesity                                                                                                                                                                                                                                                            | 4.00E-08    | -                | 29016858    |
| <i>NXNL1</i>                  | Nitrogen dioxide exposure                         | 8.00E-10    | -                | 29410382           | Maternal overweight/obesity                                                                                                                                                                                                                                                            | 1.60E-08    | -                | 29016858    |

| <b>Gene</b>     | <b>Trait1</b>                                     | <b>minP</b> | <b>Direction</b> | <b>PMID</b>        | <b>Trait2</b>               | <b>minP</b> | <b>Direction</b> | <b>PMID</b> |
|-----------------|---------------------------------------------------|-------------|------------------|--------------------|-----------------------------|-------------|------------------|-------------|
| <i>INF2</i>     | Nitrogen dioxide exposure                         | 8.10E-10    | –                | 29410382           | Maternal overweight/obesity | 5.00E-12    | –                | 29016858    |
| <i>CALML6</i>   | Nitrogen dioxide exposure                         | 8.10E-10    | –                | 29410382           | Maternal overweight/obesity | 5.90E-11    | –                | 29016858    |
| <i>PRSS36</i>   | Air pollution exposure, Nitrogen dioxide exposure | 8.10E-10    | –                | 26731791, 29410382 | Maternal overweight/obesity | 4.20E-09    | –                | 29016858    |
| <i>MGST2</i>    | Nitrogen dioxide exposure                         | 8.10E-10    | –                | 29410382           | Maternal overweight/obesity | 7.30E-09    | –                | 29016858    |
| <i>ENPP7</i>    | Nitrogen dioxide exposure                         | 8.10E-10    | –                | 29410382           | Maternal overweight/obesity | 7.90E-09    | –                | 29016858    |
| <i>MIR548I2</i> | Nitrogen dioxide exposure                         | 8.10E-10    | –                | 29410382           | Maternal overweight/obesity | 2.20E-08    | –                | 29016858    |
| <i>KRBA2</i>    | Nitrogen dioxide exposure                         | 8.20E-10    | –                | 29410382           | Maternal overweight/obesity | 2.20E-11    | –                | 29016858    |
| <i>NUAK1</i>    | Nitrogen dioxide exposure                         | 8.20E-10    | –                | 29410382           | Maternal overweight/obesity | 3.40E-09    | –                | 29016858    |
| <i>APBA2</i>    | Nitrogen dioxide exposure                         | 8.20E-10    | –                | 29410382           | Maternal overweight/obesity | 3.80E-09    | –                | 29016858    |
| <i>CDK5</i>     | Nitrogen dioxide exposure                         | 8.20E-10    | –                | 29410382           | Maternal overweight/obesity | 3.50E-08    | –                | 29016858    |
| <i>SMYD1</i>    | Nitrogen dioxide exposure                         | 8.30E-10    | –                | 29410382           | Maternal overweight/obesity | 4.40E-10    | –                | 29016858    |
| <i>SLC6A19</i>  | Nitrogen dioxide exposure                         | 8.30E-10    | –                | 29410382           | Maternal overweight/obesity | 9.80E-10    | –                | 29016858    |
| <i>GNAO1</i>    | Nitrogen dioxide exposure                         | 8.30E-10    | –                | 29410382           | Maternal overweight/obesity | 1.30E-08    | –                | 29016858    |
| <i>GPT</i>      | Nitrogen dioxide exposure                         | 8.30E-10    | –                | 29410382           | Maternal overweight/obesity | 1.30E-08    | –                | 29016858    |
| <i>IL17REL</i>  | Nitrogen dioxide exposure                         | 8.30E-10    | –                | 29410382           | Maternal overweight/obesity | 1.40E-08    | –                | 29016858    |

| <b>Gene</b>     | <b>Trait1</b>                                     | <b>minP</b> | <b>Direction</b> | <b>PMID</b>        | <b>Trait2</b>                                                | <b>minP</b> | <b>Direction</b> | <b>PMID</b>        |
|-----------------|---------------------------------------------------|-------------|------------------|--------------------|--------------------------------------------------------------|-------------|------------------|--------------------|
| <i>C11orf16</i> | Nitrogen dioxide exposure                         | 8.30E-10    | –                | 29410382           | Maternal overweight/obesity                                  | 1.80E-08    | –                | 29016858           |
| <i>GLI2</i>     | Nitrogen dioxide exposure                         | 8.30E-10    | –                | 29410382           | Maternal overweight/obesity                                  | 2.80E-08    | –                | 29016858           |
| <i>SLC4A7</i>   | Nitrogen dioxide exposure                         | 8.60E-10    | –                | 29410382           | Maternal overweight/obesity                                  | 1.90E-13    | –                | 29016858           |
| <i>PFKP</i>     | Nitrogen dioxide exposure                         | 8.60E-10    | –                | 29410382           | Maternal overweight/obesity, Triglycerides in small HDL      | 6.60E-09    | –                | 29016858           |
| <i>SNX29</i>    | Nitrogen dioxide exposure                         | 8.60E-10    | –                | 29410382           | Maternal overweight/obesity, Triglycerides                   | 9.30E-09    | –                | 29016858, 31910897 |
| <i>SORBS2</i>   | Nitrogen dioxide exposure                         | 8.60E-10    | –                | 29410382           | Maternal overweight/obesity                                  | 4.20E-08    | –                | 29016858           |
| <i>ALDH3A1</i>  | Nitrogen dioxide exposure                         | 8.70E-10    | –                | 29410382           | Maternal overweight/obesity                                  | 7.40E-09    | –                | 29016858           |
| <i>C1orf177</i> | Nitrogen dioxide exposure                         | 8.70E-10    | –                | 29410382           | Maternal overweight/obesity, fasting glucose                 | 1.80E-08    | –                | 29016858, 31197173 |
| <i>CCHCR1</i>   | Nitrogen dioxide exposure                         | 8.70E-10    | –                | 29410382           | Maternal overweight/obesity                                  | 2.50E-08    | –                | 29016858           |
| <i>OBSCN</i>    | Nitrogen dioxide exposure                         | 8.80E-10    | –                | 29410382           | Maternal overweight/obesity, Triglycerides in very large HDL | 1.70E-09    | –                | 29016858           |
| <i>SDK2</i>     | Nitrogen dioxide exposure                         | 8.90E-10    | –                | 29410382           | Maternal overweight/obesity                                  | 3.50E-11    | –                | 29016858           |
| <i>ABCA3</i>    | Air pollution exposure, Nitrogen dioxide exposure | 8.90E-10    | –                | 26731791, 29410382 | Maternal overweight/obesity                                  | 3.60E-09    | –                | 29016858           |

| <b>Gene</b>                 | <b>Trait1</b>                                                            | <b>minP</b> | <b>Direction</b> | <b>PMID</b>                  | <b>Trait2</b>                                                             | <b>minP</b> | <b>Direction</b> | <b>PMID</b>        |
|-----------------------------|--------------------------------------------------------------------------|-------------|------------------|------------------------------|---------------------------------------------------------------------------|-------------|------------------|--------------------|
| <i>CACNA2D4</i>             | Nitrogen dioxide exposure                                                | 8.90E-10    | –                | 29410382                     | Maternal overweight/obesity                                               | 9.40E-09    | –                | 29016858           |
| <i>BCL11A</i>               | Air pollution exposure, Prenatal NO2 exposure, Nitrogen dioxide exposure | 9.00E-10    | –                | 26731791, 27448387, 29410382 | Maternal overweight/obesity                                               | 2.60E-09    | –                | 29016858           |
| <i>FFAR1</i>                | Nitrogen dioxide exposure                                                | 9.10E-10    | –                | 29410382                     | Maternal overweight/obesity                                               | 2.70E-10    | –                | 29016858           |
| <i>ADAMTS2</i>              | Air pollution exposure, Nitrogen dioxide exposure                        | 9.10E-10    | –                | 26731791, 29410382           | Maternal overweight/obesity                                               | 7.90E-09    | –                | 29016858           |
| <i>MSLNL</i>                | Nitrogen dioxide exposure                                                | 9.10E-10    | –                | 29410382                     | Maternal overweight/obesity                                               | 2.20E-08    | –                | 29016858           |
| <i>NECAB3;C2<br/>Orf134</i> | Nitrogen dioxide exposure                                                | 9.20E-10    | –                | 29410382                     | Maternal overweight/obesity                                               | 6.40E-10    | –                | 29016858           |
| <i>GPR152</i>               | Nitrogen dioxide exposure                                                | 9.20E-10    | –                | 29410382                     | Maternal overweight/obesity                                               | 1.50E-08    | –                | 29016858           |
| <i>KIF3C</i>                | Nitrogen dioxide exposure                                                | 9.30E-10    | –                | 29410382                     | Maternal overweight/obesity                                               | 4.50E-10    | –                | 29016858           |
| <i>EFCAB4B</i>              | Nitrogen dioxide exposure                                                | 9.30E-10    | –                | 29410382                     | Maternal overweight/obesity                                               | 1.30E-08    | –                | 29016858           |
| <i>RAB11FIP3</i>            | Air pollution exposure, Nitrogen dioxide exposure                        | 9.30E-10    | –                | 26731791, 29410382           | Maternal overweight/obesity, fasting glucose, Diastolic blood pressure    | 2.40E-08    | –                | 29016858, 31197173 |
| <i>SCN4B</i>                | Nitrogen dioxide exposure                                                | 9.40E-10    | –                | 29410382                     | Maternal overweight/obesity, Ratio of triglycerides to phosphoglycerides, | 4.20E-08    | –                | 29016858           |



| Gene             | Trait1                                            | minP     | Direction | PMID               | Trait2                                      | minP     | Direction | PMID               |
|------------------|---------------------------------------------------|----------|-----------|--------------------|---------------------------------------------|----------|-----------|--------------------|
|                  |                                                   |          |           |                    | Triglycerides in small VLDL                 |          |           |                    |
| <i>MAG</i>       | Nitrogen dioxide exposure                         | 9.50E-10 | –         | 29410382           | Maternal overweight/obesity                 | 1.40E-09 | –         | 29016858           |
| <i>PIK3C2B</i>   | Nitrogen dioxide exposure                         | 9.50E-10 | –         | 29410382           | Maternal overweight/obesity                 | 2.70E-08 | –         | 29016858           |
| <i>PKLR</i>      | Nitrogen dioxide exposure                         | 9.50E-10 | –         | 29410382           | Maternal overweight/obesity                 | 4.40E-08 | –         | 29016858           |
| <i>TNN</i>       | Nitrogen dioxide exposure                         | 9.60E-10 | –         | 29410382           | Maternal overweight/obesity                 | 2.80E-08 | –         | 29016858           |
| <i>ZSCAN10</i>   | Air pollution exposure, Nitrogen dioxide exposure | 9.70E-10 | –         | 26731791, 29410382 | Maternal overweight/obesity                 | 4.90E-08 | –         | 29016858           |
| <i>KRT13</i>     | Nitrogen dioxide exposure                         | 9.80E-10 | –         | 29410382           | Maternal overweight/obesity, 1-hour glucose | 1.50E-11 | –         | 29016858, 33151971 |
| <i>IL17RC</i>    | Nitrogen dioxide exposure                         | 9.80E-10 | –         | 29410382           | Maternal overweight/obesity                 | 2.60E-09 | –         | 29016858           |
| <i>OBSL1</i>     | Air pollution exposure, Nitrogen dioxide exposure | 9.90E-10 | –         | 26731791, 29410382 | Maternal overweight/obesity                 | 4.60E-09 | –         | 29016858           |
| <i>RAPSN</i>     | Nitrogen dioxide exposure                         | 1.00E-09 | –         | 29410382           | Maternal overweight/obesity                 | 1.00E-10 | –         | 29016858           |
| <i>WBSCR17</i>   | Nitrogen dioxide exposure                         | 1.00E-09 | –         | 29410382           | Maternal overweight/obesity                 | 1.20E-09 | –         | 29016858           |
| <i>LOC389333</i> | Nitrogen dioxide exposure                         | 1.00E-09 | –         | 29410382           | Maternal overweight/obesity                 | 1.60E-09 | –         | 29016858           |

| <b>Gene</b>               | <b>Trait1</b>                                     | <b>minP</b> | <b>Direction</b> | <b>PMID</b>        | <b>Trait2</b>                                                                                                                                           | <b>minP</b> | <b>Direction</b> | <b>PMID</b> |
|---------------------------|---------------------------------------------------|-------------|------------------|--------------------|---------------------------------------------------------------------------------------------------------------------------------------------------------|-------------|------------------|-------------|
| <i>CHD3;SCAR<br/>NA21</i> | Nitrogen dioxide exposure                         | 1.00E-09    | –                | 29410382           | Maternal overweight/obesity                                                                                                                             | 2.50E-09    | –                | 29016858    |
| <i>RTEL1</i>              | Nitrogen dioxide exposure                         | 1.00E-09    | –                | 29410382           | Maternal overweight/obesity                                                                                                                             | 2.90E-09    | –                | 29016858    |
| <i>DLG2</i>               | Nitrogen dioxide exposure                         | 1.00E-09    | –                | 29410382           | Maternal overweight/obesity                                                                                                                             | 4.30E-09    | –                | 29016858    |
| <i>TRAM2</i>              | Nitrogen dioxide exposure                         | 1.00E-09    | –                | 29410382           | Maternal overweight/obesity, Ratio of diacylglycerol to triglycerides                                                                                   | 6.60E-09    | –                | 29016858    |
| <i>FGFR1</i>              | Nitrogen dioxide exposure                         | 1.00E-09    | –                | 29410382           | Maternal overweight/obesity, Diastolic blood pressure                                                                                                   | 9.90E-09    | –                | 29016858    |
| <i>KDM2B</i>              | Nitrogen dioxide exposure                         | 1.00E-09    | –                | 29410382           | Maternal overweight/obesity, Serum total triglycerides, Triglycerides, Triglycerides in medium VLDL, Triglycerides in small VLDL, Triglycerides in VLDL | 1.20E-08    | –                | 29016858    |
| <i>EHMT2</i>              | Air pollution exposure, Nitrogen dioxide exposure | 1.00E-09    | –                | 26731791, 29410382 | Maternal overweight/obesity                                                                                                                             | 1.60E-08    | –                | 29016858    |
| <i>MOCS1</i>              | Nitrogen dioxide exposure                         | 1.00E-09    | –                | 29410382           | Maternal overweight/obesity                                                                                                                             | 1.70E-08    | –                | 29016858    |
| <i>ACRBP</i>              | Nitrogen dioxide exposure                         | 1.00E-09    | –                | 29410382           | Maternal overweight/obesity                                                                                                                             | 1.90E-08    | –                | 29016858    |

| <b>Gene</b>      | <b>Trait1</b>                                                                       | <b>minP</b> | <b>Direction</b> | <b>PMID</b>                  | <b>Trait2</b>                                                             | <b>minP</b> | <b>Direction</b> | <b>PMID</b>        |
|------------------|-------------------------------------------------------------------------------------|-------------|------------------|------------------------------|---------------------------------------------------------------------------|-------------|------------------|--------------------|
| <i>SLCO3A1</i>   | Nitrogen dioxide exposure                                                           | 1.10E-09    | –                | 29410382                     | Maternal overweight/obesity, fasting glucose, Triglycerides in small VLDL | 6.20E-13    | –                | 29016858, 31197173 |
| <i>EPB49</i>     | Nitrogen dioxide exposure                                                           | 1.10E-09    | –                | 29410382                     | Maternal overweight/obesity                                               | 5.20E-12    | –                | 29016858           |
| <i>MRVII</i>     | Nitrogen dioxide exposure                                                           | 1.10E-09    | –                | 29410382                     | Maternal overweight/obesity                                               | 9.70E-11    | –                | 29016858           |
| <i>GPR37L1</i>   | Nitrogen dioxide exposure                                                           | 1.10E-09    | –                | 29410382                     | Maternal overweight/obesity                                               | 1.40E-10    | –                | 29016858           |
| <i>MYT1L</i>     | Air pollution exposure, Nitrogen dioxide exposure, Particulate matter air pollution | 1.10E-09    | –                | 26731791, 29410382, 32484729 | Maternal overweight/obesity                                               | 8.50E-10    | –                | 29016858           |
| <i>KCNJ6</i>     | Nitrogen dioxide exposure                                                           | 1.10E-09    | –                | 29410382                     | Maternal overweight/obesity                                               | 2.30E-09    | –                | 29016858           |
| <i>HIP1R</i>     | Nitrogen dioxide exposure                                                           | 1.10E-09    | –                | 29410382                     | Maternal overweight/obesity                                               | 2.40E-09    | –                | 29016858           |
| <i>HRNBP3</i>    | Nitrogen dioxide exposure, Particulate matter air pollution                         | 1.10E-09    | –                | 29410382, 32484729           | Maternal overweight/obesity                                               | 2.60E-09    | –                | 29016858           |
| <i>CACNA1C</i>   | Air pollution exposure, Nitrogen dioxide exposure                                   | 1.10E-09    | –                | 26731791, 29410382           | Maternal overweight/obesity, Triglycerides                                | 3.10E-09    | –                | 29016858, 31910897 |
| <i>C10orf116</i> | Nitrogen dioxide exposure                                                           | 1.10E-09    | –                | 29410382                     | Maternal overweight/obesity                                               | 6.20E-09    | –                | 29016858           |
| <i>CAPN13</i>    | Nitrogen dioxide exposure                                                           | 1.10E-09    | –                | 29410382                     | Maternal overweight/obesity                                               | 7.20E-09    | –                | 29016858           |
| <i>CDGAP</i>     | Nitrogen dioxide exposure                                                           | 1.10E-09    | –                | 29410382                     | Maternal overweight/obesity                                               | 8.70E-09    | –                | 29016858           |

| <b>Gene</b>    | <b>Trait1</b>                                     | <b>minP</b> | <b>Direction</b> | <b>PMID</b>        | <b>Trait2</b>                                                                                          | <b>minP</b> | <b>Direction</b> | <b>PMID</b> |
|----------------|---------------------------------------------------|-------------|------------------|--------------------|--------------------------------------------------------------------------------------------------------|-------------|------------------|-------------|
| <i>PTPRS</i>   | Nitrogen dioxide exposure                         | 1.10E-09    | -                | 29410382           | Maternal overweight/obesity                                                                            | 9.50E-09    | -                | 29016858    |
| <i>PLXNA2</i>  | Nitrogen dioxide exposure                         | 1.10E-09    | -                | 29410382           | Maternal overweight/obesity, Glucose                                                                   | 1.50E-08    | -                | 29016858    |
| <i>CAMSAP1</i> | Nitrogen dioxide exposure                         | 1.10E-09    | -                | 29410382           | Maternal overweight/obesity                                                                            | 2.30E-08    | -                | 29016858    |
| <i>STOX2</i>   | Nitrogen dioxide exposure                         | 1.10E-09    | -                | 29410382           | Maternal overweight/obesity                                                                            | 2.30E-08    | -                | 29016858    |
| <i>POU6F1</i>  | Nitrogen dioxide exposure                         | 1.10E-09    | -                | 29410382           | Maternal overweight/obesity                                                                            | 2.90E-08    | -                | 29016858    |
| <i>SERINC2</i> | Air pollution exposure, Nitrogen dioxide exposure | 1.10E-09    | +                | 26731791, 29410382 | Maternal overweight/obesity                                                                            | 4.30E-08    | +                | 29016858    |
| <i>SEPT9</i>   | Nitrogen dioxide exposure                         | 1.20E-09    | -                | 29410382           | Maternal overweight/obesity                                                                            | 5.80E-11    | -                | 29016858    |
| <i>IGFN1</i>   | Nitrogen dioxide exposure                         | 1.20E-09    | -                | 29410382           | Maternal overweight/obesity                                                                            | 6.50E-11    | -                | 29016858    |
| <i>C6orf10</i> | Nitrogen dioxide exposure                         | 1.20E-09    | -                | 29410382           | Maternal overweight/obesity                                                                            | 1.60E-10    | -                | 29016858    |
| <i>TNXB</i>    | Air pollution exposure, Nitrogen dioxide exposure | 1.20E-09    | -                | 26731791, 29410382 | Maternal overweight/obesity, Glucose, Triglycerides to total lipids ratio in chylomicrons and XXL-VLDL | 2.40E-10    | -                | 29016858    |
| <i>TAP1</i>    | Nitrogen dioxide exposure                         | 1.20E-09    | -                | 29410382           | Maternal overweight/obesity                                                                            | 4.40E-10    | -                | 29016858    |
| <i>PPYR1</i>   | Nitrogen dioxide exposure                         | 1.20E-09    | -                | 29410382           | Maternal overweight/obesity                                                                            | 8.20E-10    | -                | 29016858    |

| <b>Gene</b>     | <b>Trait1</b>                                     | <b>minP</b> | <b>Direction</b> | <b>PMID</b>        | <b>Trait2</b>                                                                                                                                                                      | <b>minP</b> | <b>Direction</b> | <b>PMID</b> |
|-----------------|---------------------------------------------------|-------------|------------------|--------------------|------------------------------------------------------------------------------------------------------------------------------------------------------------------------------------|-------------|------------------|-------------|
| <i>FAM83A</i>   | Nitrogen dioxide exposure                         | 1.20E-09    | –                | 29410382           | Maternal overweight/obesity, Triglycerides to total lipids ratio in large LDL, Triglycerides to total lipids ratio in medium LDL, Triglycerides to total lipids ratio in small LDL | 1.00E-09    | –                | 29016858    |
| <i>FLJ45079</i> | Nitrogen dioxide exposure                         | 1.20E-09    | –                | 29410382           | Maternal overweight/obesity                                                                                                                                                        | 2.20E-09    | –                | 29016858    |
| <i>SRC</i>      | Nitrogen dioxide exposure                         | 1.20E-09    | –                | 29410382           | Maternal overweight/obesity                                                                                                                                                        | 2.30E-09    | –                | 29016858    |
| <i>HOMER2</i>   | Nitrogen dioxide exposure                         | 1.20E-09    | –                | 29410382           | Maternal overweight/obesity, Triglycerides in HDL, Triglycerides in IDL, Triglycerides in medium HDL, Triglycerides in small HDL, Triglycerides in small LDL                       | 2.80E-09    | –                | 29016858    |
| <i>ASB2</i>     | Nitrogen dioxide exposure                         | 1.20E-09    | –                | 29410382           | Maternal overweight/obesity                                                                                                                                                        | 5.10E-09    | –                | 29016858    |
| <i>C10orf90</i> | Nitrogen dioxide exposure                         | 1.20E-09    | –                | 29410382           | Maternal overweight/obesity                                                                                                                                                        | 7.50E-09    | –                | 29016858    |
| <i>C1orf175</i> | Air pollution exposure, Nitrogen dioxide exposure | 1.20E-09    | –                | 26731791, 29410382 | Maternal overweight/obesity                                                                                                                                                        | 1.20E-08    | –                | 29016858    |

| <b>Gene</b>                 | <b>Trait1</b>                                     | <b>minP</b> | <b>Direction</b> | <b>PMID</b>        | <b>Trait2</b>                                                                       | <b>minP</b> | <b>Direction</b> | <b>PMID</b>        |
|-----------------------------|---------------------------------------------------|-------------|------------------|--------------------|-------------------------------------------------------------------------------------|-------------|------------------|--------------------|
| <i>RICH2</i>                | Air pollution exposure, Nitrogen dioxide exposure | 1.20E-09    | –                | 26731791, 29410382 | Maternal overweight/obesity                                                         | 1.50E-08    | –                | 29016858           |
| <i>SIPAIL2</i>              | Nitrogen dioxide exposure                         | 1.20E-09    | –                | 29410382           | Maternal overweight/obesity, Triglycerides in very small VLDL                       | 1.80E-08    | –                | 29016858           |
| <i>THSD4</i>                | Nitrogen dioxide exposure                         | 1.20E-09    | –                | 29410382           | Maternal overweight/obesity                                                         | 2.50E-08    | –                | 29016858           |
| <i>GALNT9;LO C100130238</i> | Nitrogen dioxide exposure                         | 1.20E-09    | –                | 29410382           | Maternal overweight/obesity, Glucose                                                | 2.70E-08    | –                | 29016858           |
| <i>FAM176A</i>              | Nitrogen dioxide exposure                         | 1.20E-09    | –                | 29410382           | Maternal overweight/obesity                                                         | 3.30E-08    | –                | 29016858           |
| <i>MDFI</i>                 | Nitrogen dioxide exposure                         | 1.20E-09    | –                | 29410382           | Maternal overweight/obesity                                                         | 3.50E-08    | –                | 29016858           |
| <i>D2HGDH</i>               | Nitrogen dioxide exposure                         | 1.20E-09    | –                | 29410382           | Maternal overweight/obesity, Ratio of diacylglycerol to triglycerides               | 3.90E-08    | –                | 29016858           |
| <i>C1orf210</i>             | Nitrogen dioxide exposure                         | 1.20E-09    | –                | 29410382           | Maternal overweight/obesity                                                         | 4.10E-08    | –                | 29016858           |
| <i>NLRP10</i>               | Nitrogen dioxide exposure                         | 1.20E-09    | –                | 29410382           | Maternal overweight/obesity                                                         | 4.90E-08    | –                | 29016858           |
| <i>AQP1</i>                 | Nitrogen dioxide exposure                         | 1.30E-09    | –                | 29410382           | Maternal overweight/obesity                                                         | 4.30E-11    | –                | 29016858           |
| <i>MAML3</i>                | Nitrogen dioxide exposure                         | 1.30E-09    | –                | 29410382           | Maternal overweight/obesity, 1-hour glucose, Triglycerides to total lipids ratio in | 4.80E-11    | –                | 29016858, 33151971 |

| Gene              | Trait1                                            | minP     | Direction | PMID                  | Trait2                                                                                                                | minP     | Direction | PMID     |
|-------------------|---------------------------------------------------|----------|-----------|-----------------------|-----------------------------------------------------------------------------------------------------------------------|----------|-----------|----------|
|                   |                                                   |          |           |                       | chylomicrons and<br>XXL-VLDL                                                                                          |          |           |          |
| <i>EIF4G1</i>     | Nitrogen dioxide exposure                         | 1.30E-09 | –         | 29410382              | Maternal overweight/obesity                                                                                           | 5.10E-11 | –         | 29016858 |
| <i>ATP10A</i>     | Air pollution exposure, Nitrogen dioxide exposure | 1.30E-09 | –         | 26731791,<br>29410382 | Maternal overweight/obesity                                                                                           | 1.80E-10 | –         | 29016858 |
| <i>MRAS</i>       | Nitrogen dioxide exposure                         | 1.30E-09 | –         | 29410382              | Maternal overweight/obesity                                                                                           | 3.00E-10 | –         | 29016858 |
| <i>GRM6</i>       | Nitrogen dioxide exposure                         | 1.30E-09 | –         | 29410382              | Maternal overweight/obesity                                                                                           | 6.70E-10 | –         | 29016858 |
| <i>CDK18</i>      | Air pollution exposure, Nitrogen dioxide exposure | 1.30E-09 | –         | 26731791,<br>29410382 | Maternal overweight/obesity                                                                                           | 7.50E-10 | –         | 29016858 |
| <i>GNG7</i>       | Air pollution exposure, Nitrogen dioxide exposure | 1.30E-09 | –         | 26731791,<br>29410382 | Maternal overweight/obesity,<br>Triglycerides in large HDL,<br>Triglycerides to total lipids ratio in very large VLDL | 9.00E-10 | –         | 29016858 |
| <i>NCRNA00171</i> | Nitrogen dioxide exposure                         | 1.30E-09 | –         | 29410382              | Maternal overweight/obesity                                                                                           | 1.40E-09 | –         | 29016858 |
| <i>ZNF593</i>     | Nitrogen dioxide exposure                         | 1.30E-09 | –         | 29410382              | Maternal overweight/obesity                                                                                           | 1.80E-09 | –         | 29016858 |
| <i>TACC2</i>      | Air pollution exposure, Nitrogen dioxide exposure | 1.30E-09 | –         | 26731791,<br>29410382 | Maternal overweight/obesity                                                                                           | 2.10E-09 | –         | 29016858 |

| <b>Gene</b>      | <b>Trait1</b>             | <b>minP</b> | <b>Direction</b> | <b>PMID</b> | <b>Trait2</b>                                                                      | <b>minP</b> | <b>Direction</b> | <b>PMID</b>        |
|------------------|---------------------------|-------------|------------------|-------------|------------------------------------------------------------------------------------|-------------|------------------|--------------------|
| <i>UST</i>       | Nitrogen dioxide exposure | 1.30E-09    | –                | 29410382    | Maternal overweight/obesity                                                        | 3.40E-09    | –                | 29016858           |
| <i>LY6G6C</i>    | Nitrogen dioxide exposure | 1.30E-09    | –                | 29410382    | Maternal overweight/obesity                                                        | 4.80E-09    | –                | 29016858           |
| <i>ARHGEF3</i>   | Nitrogen dioxide exposure | 1.30E-09    | –                | 29410382    | Maternal overweight/obesity                                                        | 5.70E-09    | –                | 29016858           |
| <i>RNASE7</i>    | Nitrogen dioxide exposure | 1.30E-09    | –                | 29410382    | Maternal overweight/obesity                                                        | 6.10E-09    | –                | 29016858           |
| <i>MX1</i>       | Nitrogen dioxide exposure | 1.30E-09    | –                | 29410382    | Maternal overweight/obesity                                                        | 9.80E-09    | –                | 29016858           |
| <i>DOK7</i>      | Nitrogen dioxide exposure | 1.30E-09    | –                | 29410382    | Maternal overweight/obesity, Triglycerides to total lipids ratio in very large HDL | 1.30E-08    | –                | 29016858           |
| <i>C14orf181</i> | Nitrogen dioxide exposure | 1.30E-09    | –                | 29410382    | Maternal overweight/obesity                                                        | 1.90E-08    | –                | 29016858           |
| <i>NEURL</i>     | Nitrogen dioxide exposure | 1.30E-09    | –                | 29410382    | Maternal overweight/obesity                                                        | 2.30E-08    | –                | 29016858           |
| <i>ST3GAL6</i>   | Nitrogen dioxide exposure | 1.30E-09    | –                | 29410382    | Maternal overweight/obesity, 1-hour glucose                                        | 2.50E-08    | –                | 29016858, 33151971 |
| <i>SMAD7</i>     | Nitrogen dioxide exposure | 1.30E-09    | –                | 29410382    | Maternal overweight/obesity, fasting glucose                                       | 3.00E-08    | –                | 29016858, 31197173 |
| <i>PRKAR2A</i>   | Nitrogen dioxide exposure | 1.30E-09    | –                | 29410382    | Maternal overweight/obesity                                                        | 3.10E-08    | +                | 29016858           |
| <i>RBP3</i>      | Nitrogen dioxide exposure | 1.30E-09    | –                | 29410382    | Maternal overweight/obesity                                                        | 4.10E-08    | –                | 29016858           |
| <i>RHPN1</i>     | Nitrogen dioxide exposure | 1.30E-09    | –                | 29410382    | Maternal overweight/obesity, Ratio of                                              | 4.30E-08    | –                | 29016858           |



| Gene            | Trait1                                            | minP     | Direction | PMID               | Trait2                                                                                                                     | minP     | Direction | PMID               |
|-----------------|---------------------------------------------------|----------|-----------|--------------------|----------------------------------------------------------------------------------------------------------------------------|----------|-----------|--------------------|
|                 |                                                   |          |           |                    | diacylglycerol to triglycerides                                                                                            |          |           |                    |
| <i>PDE6B</i>    | Nitrogen dioxide exposure                         | 1.30E-09 | –         | 29410382           | Maternal overweight/obesity                                                                                                | 4.30E-08 | –         | 29016858           |
| <i>SLIT3</i>    | Nitrogen dioxide exposure                         | 1.40E-09 | –         | 29410382           | Maternal overweight/obesity, Triglycerides in chylomicrons and extremely large VLDL                                        | 2.20E-11 | –         | 29016858           |
| <i>MFSD2B</i>   | Nitrogen dioxide exposure                         | 1.40E-09 | –         | 29410382           | Maternal overweight/obesity                                                                                                | 6.30E-11 | –         | 29016858           |
| <i>TRIM2</i>    | Nitrogen dioxide exposure                         | 1.40E-09 | –         | 29410382           | Maternal overweight/obesity                                                                                                | 4.20E-10 | –         | 29016858           |
| <i>FBXW12</i>   | Nitrogen dioxide exposure                         | 1.40E-09 | –         | 29410382           | Maternal overweight/obesity                                                                                                | 4.50E-10 | –         | 29016858           |
| <i>PLCH2</i>    | Nitrogen dioxide exposure                         | 1.40E-09 | –         | 29410382           | Maternal overweight/obesity, Glucose                                                                                       | 1.00E-09 | –         | 29016858           |
| <i>ST14</i>     | Nitrogen dioxide exposure                         | 1.40E-09 | –         | 29410382           | Maternal overweight/obesity, Triglycerides to total lipids ratio in IDL, Triglycerides to total lipids ratio in small VLDL | 1.90E-09 | –         | 29016858           |
| <i>FLJ10357</i> | Nitrogen dioxide exposure                         | 1.40E-09 | –         | 29410382           | Maternal overweight/obesity                                                                                                | 1.90E-09 | –         | 29016858           |
| <i>NTM</i>      | Air pollution exposure, Nitrogen dioxide exposure | 1.40E-09 | –         | 26731791, 29410382 | Maternal overweight/obesity, fasting glucose                                                                               | 2.00E-09 | –         | 29016858, 31197173 |

| <b>Gene</b>                | <b>Trait1</b>                                     | <b>minP</b> | <b>Direction</b> | <b>PMID</b>        | <b>Trait2</b>                                | <b>minP</b> | <b>Direction</b> | <b>PMID</b>        |
|----------------------------|---------------------------------------------------|-------------|------------------|--------------------|----------------------------------------------|-------------|------------------|--------------------|
| <i>MGMT</i>                | Nitrogen dioxide exposure                         | 1.40E-09    | –                | 29410382           | Maternal overweight/obesity, fasting glucose | 2.30E-09    | –                | 29016858, 31197173 |
| <i>TUB</i>                 | Nitrogen dioxide exposure                         | 1.40E-09    | –                | 29410382           | Maternal overweight/obesity                  | 3.10E-09    | –                | 29016858           |
| <i>ADSSL1</i>              | Nitrogen dioxide exposure                         | 1.40E-09    | –                | 29410382           | Maternal overweight/obesity                  | 3.90E-09    | –                | 29016858           |
| <i>THY1</i>                | Nitrogen dioxide exposure                         | 1.40E-09    | –                | 29410382           | Maternal overweight/obesity                  | 4.90E-09    | –                | 29016858           |
| <i>LYNX1</i>               | Nitrogen dioxide exposure                         | 1.40E-09    | –                | 29410382           | Maternal overweight/obesity                  | 6.30E-09    | –                | 29016858           |
| <i>TRANK1</i>              | Nitrogen dioxide exposure                         | 1.40E-09    | –                | 29410382           | Maternal overweight/obesity, 1-hour glucose  | 7.20E-09    | –                | 29016858, 33151971 |
| <i>LOC400931; MIRLET7B</i> | Nitrogen dioxide exposure                         | 1.40E-09    | –                | 29410382           | Maternal overweight/obesity                  | 7.30E-09    | –                | 29016858           |
| <i>LOC282997; PDCD4</i>    | Nitrogen dioxide exposure                         | 1.40E-09    | –                | 29410382           | Maternal overweight/obesity                  | 8.30E-09    | –                | 29016858           |
| <i>CALHM3</i>              | Nitrogen dioxide exposure                         | 1.40E-09    | –                | 29410382           | Maternal overweight/obesity                  | 1.60E-08    | –                | 29016858           |
| <i>FAM167A</i>             | Air pollution exposure, Nitrogen dioxide exposure | 1.40E-09    | –                | 26731791, 29410382 | Maternal overweight/obesity                  | 3.70E-08    | –                | 29016858           |
| <i>NGF</i>                 | Nitrogen dioxide exposure                         | 1.50E-09    | –                | 29410382           | Maternal overweight/obesity                  | 7.00E-10    | –                | 29016858           |
| <i>FLJ23834</i>            | Nitrogen dioxide exposure                         | 1.50E-09    | –                | 29410382           | Maternal overweight/obesity                  | 2.50E-09    | –                | 29016858           |
| <i>MEGF6</i>               | Nitrogen dioxide exposure                         | 1.50E-09    | –                | 29410382           | Maternal overweight/obesity                  | 2.80E-09    | –                | 29016858           |
| <i>ACTR5</i>               | Nitrogen dioxide exposure                         | 1.50E-09    | –                | 29410382           | Maternal overweight/obesity                  | 3.70E-09    | –                | 29016858           |

| <b>Gene</b>    | <b>Trait1</b>                                     | <b>minP</b> | <b>Direction</b> | <b>PMID</b>        | <b>Trait2</b>                                                                                                                                                  | <b>minP</b> | <b>Direction</b> | <b>PMID</b>        |
|----------------|---------------------------------------------------|-------------|------------------|--------------------|----------------------------------------------------------------------------------------------------------------------------------------------------------------|-------------|------------------|--------------------|
| <i>PRKAG2</i>  | Air pollution exposure, Nitrogen dioxide exposure | 1.50E-09    | -                | 26731791, 29410382 | Maternal overweight/obesity, Diastolic blood pressure                                                                                                          | 9.60E-09    | -                | 29016858           |
| <i>SYT8</i>    | Nitrogen dioxide exposure                         | 1.50E-09    | -                | 29410382           | Maternal overweight/obesity                                                                                                                                    | 1.60E-08    | -                | 29016858           |
| <i>KCNMA1</i>  | Air pollution exposure, Nitrogen dioxide exposure | 1.50E-09    | -                | 26731791, 29410382 | Maternal overweight/obesity, fasting glucose                                                                                                                   | 1.90E-08    | -                | 29016858, 31197173 |
| <i>TSPO2</i>   | Nitrogen dioxide exposure                         | 1.50E-09    | -                | 29410382           | Maternal overweight/obesity                                                                                                                                    | 2.00E-08    | -                | 29016858           |
| <i>ZNF783</i>  | Nitrogen dioxide exposure                         | 1.50E-09    | -                | 29410382           | Maternal overweight/obesity                                                                                                                                    | 3.60E-08    | -                | 29016858           |
| <i>STC2</i>    | Nitrogen dioxide exposure                         | 1.50E-09    | -                | 29410382           | Maternal overweight/obesity                                                                                                                                    | 4.90E-08    | +                | 29016858           |
| <i>ITIH4</i>   | Nitrogen dioxide exposure                         | 1.60E-09    | -                | 29410382           | Maternal overweight/obesity                                                                                                                                    | 1.70E-13    | -                | 29016858           |
| <i>XYLT1</i>   | Air pollution exposure, Nitrogen dioxide exposure | 1.60E-09    | -                | 26731791, 29410382 | Maternal overweight/obesity, 1-hour glucose, Glucose, HDL cholesterol, Triglycerides in very large HDL, Triglycerides to total lipids ratio in very large VLDL | 3.90E-12    | -                | 29016858, 33151971 |
| <i>C5orf20</i> | Nitrogen dioxide exposure                         | 1.60E-09    | -                | 29410382           | Maternal overweight/obesity                                                                                                                                    | 2.40E-11    | -                | 29016858           |
| <i>TIRAP</i>   | Nitrogen dioxide exposure                         | 1.60E-09    | -                | 29410382           | Maternal overweight/obesity                                                                                                                                    | 1.70E-10    | -                | 29016858           |
| <i>TRAPPC9</i> | Air pollution exposure, Nitrogen dioxide exposure | 1.60E-09    | -                | 26731791, 29410382 | Maternal overweight/obesity, 1-hour glucose                                                                                                                    | 5.60E-10    | -                | 29016858, 33151971 |

| <b>Gene</b>    | <b>Trait1</b>             | <b>minP</b> | <b>Direction</b> | <b>PMID</b> | <b>Trait2</b>                                | <b>minP</b> | <b>Direction</b> | <b>PMID</b>        |
|----------------|---------------------------|-------------|------------------|-------------|----------------------------------------------|-------------|------------------|--------------------|
| <i>THEM5</i>   | Nitrogen dioxide exposure | 1.60E-09    | -                | 29410382    | Maternal overweight/obesity                  | 1.10E-09    | -                | 29016858           |
| <i>TNS1</i>    | Nitrogen dioxide exposure | 1.60E-09    | -                | 29410382    | Maternal overweight/obesity                  | 2.80E-09    | -                | 29016858           |
| <i>TMEM169</i> | Nitrogen dioxide exposure | 1.60E-09    | -                | 29410382    | Maternal overweight/obesity                  | 8.00E-09    | -                | 29016858           |
| <i>TSTA3</i>   | Nitrogen dioxide exposure | 1.60E-09    | -                | 29410382    | Maternal overweight/obesity                  | 1.10E-08    | -                | 29016858           |
| <i>KIF17</i>   | Nitrogen dioxide exposure | 1.60E-09    | -                | 29410382    | Maternal overweight/obesity                  | 1.10E-08    | -                | 29016858           |
| <i>CCDC114</i> | Nitrogen dioxide exposure | 1.60E-09    | -                | 29410382    | Maternal overweight/obesity                  | 3.20E-08    | -                | 29016858           |
| <i>ZBTB46</i>  | Nitrogen dioxide exposure | 1.60E-09    | -                | 29410382    | Maternal overweight/obesity, fasting glucose | 3.50E-08    | -                | 29016858, 31197173 |
| <i>ELFN1</i>   | Nitrogen dioxide exposure | 1.60E-09    | -                | 29410382    | Maternal overweight/obesity                  | 4.20E-08    | -                | 29016858           |
| <i>GBAP1</i>   | Nitrogen dioxide exposure | 1.70E-09    | +                | 29410382    | Maternal overweight/obesity                  | 1.20E-10    | +                | 29016858           |
| <i>NKDI</i>    | Nitrogen dioxide exposure | 1.70E-09    | -                | 29410382    | Maternal overweight/obesity                  | 7.60E-10    | -                | 29016858           |
| <i>TPO</i>     | Nitrogen dioxide exposure | 1.70E-09    | -                | 29410382    | Maternal overweight/obesity                  | 4.00E-09    | -                | 29016858           |
| <i>MYO1A</i>   | Nitrogen dioxide exposure | 1.70E-09    | -                | 29410382    | Maternal overweight/obesity                  | 6.90E-09    | +                | 29016858           |
| <i>PDCD1</i>   | Nitrogen dioxide exposure | 1.70E-09    | -                | 29410382    | Maternal overweight/obesity                  | 7.90E-09    | -                | 29016858           |

| <b>Gene</b>    | <b>Trait1</b>                                                                       | <b>minP</b> | <b>Direction</b> | <b>PMID</b>                  | <b>Trait2</b>                                                                                                                                 | <b>minP</b> | <b>Direction</b> | <b>PMID</b>        |
|----------------|-------------------------------------------------------------------------------------|-------------|------------------|------------------------------|-----------------------------------------------------------------------------------------------------------------------------------------------|-------------|------------------|--------------------|
| <i>RYR2</i>    | Nitrogen dioxide exposure                                                           | 1.70E-09    | -                | 29410382                     | Maternal overweight/obesity, Triglycerides in medium HDL, Triglycerides in very small VLDL, Triglycerides to total lipids ratio in medium HDL | 1.10E-08    | -                | 29016858           |
| <i>HIPK2</i>   | Nitrogen dioxide exposure                                                           | 1.70E-09    | -                | 29410382                     | Maternal overweight/obesity                                                                                                                   | 1.70E-08    | +                | 29016858           |
| <i>DSCAML1</i> | Air pollution exposure, Nitrogen dioxide exposure                                   | 1.70E-09    | -                | 26731791, 29410382           | Maternal overweight/obesity                                                                                                                   | 2.40E-08    | -                | 29016858           |
| <i>PLXNA4</i>  | Air pollution exposure, Nitrogen dioxide exposure, Particulate matter ≤10 um (PM10) | 1.70E-09    | -                | 26731791, 29410382, 31148503 | Maternal overweight/obesity                                                                                                                   | 3.20E-08    | -                | 29016858           |
| <i>PANX3</i>   | Nitrogen dioxide exposure                                                           | 1.80E-09    | -                | 29410382                     | Maternal overweight/obesity                                                                                                                   | 6.70E-10    | -                | 29016858           |
| <i>AFF3</i>    | Nitrogen dioxide exposure                                                           | 1.80E-09    | -                | 29410382                     | Maternal overweight/obesity                                                                                                                   | 7.70E-10    | -                | 29016858           |
| <i>SCNN1A</i>  | Nitrogen dioxide exposure                                                           | 1.80E-09    | -                | 29410382                     | Maternal overweight/obesity, Diastolic Blood Pressure, Systolic Blood Pressure                                                                | 9.40E-10    | -                | 29016858, 29198723 |
| <i>CD276</i>   | Nitrogen dioxide exposure                                                           | 1.80E-09    | -                | 29410382                     | Maternal overweight/obesity                                                                                                                   | 9.80E-10    | -                | 29016858           |
| <i>CARS2</i>   | Air pollution exposure, Nitrogen dioxide exposure                                   | 1.80E-09    | -                | 26731791, 29410382           | Maternal overweight/obesity                                                                                                                   | 1.40E-09    | -                | 29016858           |

| <b>Gene</b>   | <b>Trait1</b>                                     | <b>minP</b> | <b>Direction</b> | <b>PMID</b>        | <b>Trait2</b>                                                                                                                                                                                                                                                                               | <b>minP</b> | <b>Direction</b> | <b>PMID</b>                            |
|---------------|---------------------------------------------------|-------------|------------------|--------------------|---------------------------------------------------------------------------------------------------------------------------------------------------------------------------------------------------------------------------------------------------------------------------------------------|-------------|------------------|----------------------------------------|
| <i>MAP2K5</i> | Nitrogen dioxide exposure                         | 1.80E-09    | –                | 29410382           | Maternal overweight/obesity, 1-hour glucose                                                                                                                                                                                                                                                 | 2.30E-09    | –                | 29016858, 33151971                     |
| <i>SDK1</i>   | Air pollution exposure, Nitrogen dioxide exposure | 1.80E-09    | –                | 26731791, 29410382 | Maternal overweight/obesity, Glucose, Triglycerides to total lipids ratio in IDL, Triglycerides to total lipids ratio in large LDL, Triglycerides to total lipids ratio in medium LDL, Triglycerides to total lipids ratio in medium VLDL, Triglycerides to total lipids ratio in small HDL | 3.80E-09    | –                | 29016858                               |
| <i>PCNXL2</i> | Nitrogen dioxide exposure                         | 1.80E-09    | –                | 29410382           | Maternal overweight/obesity, Triglycerides                                                                                                                                                                                                                                                  | 5.30E-09    | –                | 29016858, 31910897                     |
| <i>TDRD10</i> | Nitrogen dioxide exposure                         | 1.80E-09    | –                | 29410382           | Maternal overweight/obesity                                                                                                                                                                                                                                                                 | 7.60E-09    | –                | 29016858                               |
| <i>RERE</i>   | Nitrogen dioxide exposure                         | 1.80E-09    | –                | 29410382           | Serum triglycerides, Maternal overweight/obesity, fasting glucose, Triglycerides                                                                                                                                                                                                            | 1.20E-08    | –                | 28173150, 29016858, 31197173, 31910897 |
| <i>DHX16</i>  | Nitrogen dioxide exposure                         | 1.80E-09    | –                | 29410382           | Maternal overweight/obesity                                                                                                                                                                                                                                                                 | 1.60E-08    | –                | 29016858                               |

| <b>Gene</b>            | <b>Trait1</b>                                     | <b>minP</b> | <b>Direction</b> | <b>PMID</b>        | <b>Trait2</b>                                                                                                                                      | <b>minP</b> | <b>Direction</b> | <b>PMID</b>        |
|------------------------|---------------------------------------------------|-------------|------------------|--------------------|----------------------------------------------------------------------------------------------------------------------------------------------------|-------------|------------------|--------------------|
| <i>ASB10</i>           | Nitrogen dioxide exposure                         | 1.80E-09    | -                | 29410382           | Maternal overweight/obesity                                                                                                                        | 2.40E-08    | -                | 29016858           |
| <i>GGT1</i>            | Nitrogen dioxide exposure                         | 1.80E-09    | -                | 29410382           | Maternal overweight/obesity                                                                                                                        | 2.80E-08    | -                | 29016858           |
| <i>MAP3K7IP1</i>       | Nitrogen dioxide exposure                         | 1.80E-09    | +                | 29410382           | Maternal overweight/obesity, fasting glucose                                                                                                       | 2.90E-08    | +                | 29016858, 31197173 |
| <i>AK3L1</i>           | Nitrogen dioxide exposure                         | 1.80E-09    | -                | 29410382           | Maternal overweight/obesity                                                                                                                        | 3.70E-08    | -                | 29016858           |
| <i>JAKMIP3</i>         | Nitrogen dioxide exposure                         | 1.80E-09    | -                | 29410382           | Maternal overweight/obesity                                                                                                                        | 4.20E-08    | -                | 29016858           |
| <i>ASB18</i>           | Nitrogen dioxide exposure                         | 1.90E-09    | -                | 29410382           | Maternal overweight/obesity                                                                                                                        | 1.40E-12    | -                | 29016858           |
| <i>KIAA1688</i>        | Air pollution exposure, Nitrogen dioxide exposure | 1.90E-09    | -                | 26731791, 29410382 | Maternal overweight/obesity                                                                                                                        | 1.20E-11    | -                | 29016858           |
| <i>ARHGAP18</i>        | Nitrogen dioxide exposure                         | 1.90E-09    | -                | 29410382           | Maternal overweight/obesity, 1-hour glucose                                                                                                        | 2.80E-11    | -                | 29016858, 33151971 |
| <i>PACRG;LOC285796</i> | Nitrogen dioxide exposure                         | 1.90E-09    | -                | 29410382           | Maternal overweight/obesity                                                                                                                        | 2.70E-10    | -                | 29016858           |
| <i>ALDH1L1</i>         | Nitrogen dioxide exposure                         | 1.90E-09    | -                | 29410382           | Maternal overweight/obesity, Triglycerides in chylomicrons and extremely large VLDL, Triglycerides in small VLDL, Triglycerides in very large VLDL | 1.00E-09    | -                | 29016858           |

| <b>Gene</b>          | <b>Trait1</b>                                     | <b>minP</b> | <b>Direction</b> | <b>PMID</b>        | <b>Trait2</b>                                | <b>minP</b> | <b>Direction</b> | <b>PMID</b>        |
|----------------------|---------------------------------------------------|-------------|------------------|--------------------|----------------------------------------------|-------------|------------------|--------------------|
| <i>FAM19A5</i>       | Air pollution exposure, Nitrogen dioxide exposure | 1.90E-09    | –                | 26731791, 29410382 | Maternal overweight/obesity                  | 5.20E-09    | –                | 29016858           |
| <i>SLC2A14</i>       | Nitrogen dioxide exposure                         | 1.90E-09    | –                | 29410382           | Maternal overweight/obesity                  | 1.00E-08    | –                | 29016858           |
| <i>DNAH10</i>        | Nitrogen dioxide exposure                         | 1.90E-09    | –                | 29410382           | Maternal overweight/obesity, fasting glucose | 4.70E-08    | –                | 29016858, 31197173 |
| <i>SGSH</i>          | Nitrogen dioxide exposure                         | 2.00E-09    | –                | 29410382           | Maternal overweight/obesity                  | 2.30E-11    | –                | 29016858           |
| <i>MIR451;MIR144</i> | Nitrogen dioxide exposure                         | 2.00E-09    | –                | 29410382           | Maternal overweight/obesity                  | 6.10E-10    | –                | 29016858           |
| <i>KCNH4</i>         | Nitrogen dioxide exposure                         | 2.00E-09    | –                | 29410382           | Maternal overweight/obesity                  | 6.80E-10    | –                | 29016858           |
| <i>PHYHIP</i>        | Nitrogen dioxide exposure                         | 2.00E-09    | –                | 29410382           | Maternal overweight/obesity                  | 8.50E-10    | –                | 29016858           |
| <i>MUC5B</i>         | Nitrogen dioxide exposure                         | 2.00E-09    | –                | 29410382           | Maternal overweight/obesity                  | 1.00E-09    | –                | 29016858           |
| <i>ADRA1B</i>        | Nitrogen dioxide exposure                         | 2.00E-09    | –                | 29410382           | Maternal overweight/obesity                  | 1.60E-09    | –                | 29016858           |
| <i>PLXNB1</i>        | Nitrogen dioxide exposure                         | 2.00E-09    | –                | 29410382           | Maternal overweight/obesity                  | 3.90E-09    | –                | 29016858           |
| <i>KCNQ1</i>         | Nitrogen dioxide exposure                         | 2.00E-09    | –                | 29410382           | Maternal overweight/obesity                  | 5.10E-09    | –                | 29016858           |
| <i>FGF1</i>          | Nitrogen dioxide exposure                         | 2.00E-09    | –                | 29410382           | Maternal overweight/obesity                  | 1.90E-08    | –                | 29016858           |
| <i>ITPR3</i>         | Air pollution exposure, Nitrogen dioxide exposure | 2.00E-09    | –                | 26731791, 29410382 | Maternal overweight/obesity                  | 3.20E-08    | –                | 29016858           |
| <i>PIK3R5</i>        | Air pollution exposure, Nitrogen dioxide exposure | 2.10E-09    | –                | 26731791, 29410382 | Maternal overweight/obesity                  | 1.70E-12    | –                | 29016858           |



| <b>Gene</b>       | <b>Trait1</b>                                     | <b>minP</b> | <b>Direction</b> | <b>PMID</b>        | <b>Trait2</b>                                | <b>minP</b> | <b>Direction</b> | <b>PMID</b>        |
|-------------------|---------------------------------------------------|-------------|------------------|--------------------|----------------------------------------------|-------------|------------------|--------------------|
| <i>ATP6V1B1</i>   | Nitrogen dioxide exposure                         | 2.10E-09    | –                | 29410382           | Maternal overweight/obesity                  | 7.40E-11    | –                | 29016858           |
| <i>CCR2</i>       | Nitrogen dioxide exposure                         | 2.10E-09    | –                | 29410382           | Maternal overweight/obesity                  | 9.80E-11    | –                | 29016858           |
| <i>ADARB2</i>     | Air pollution exposure, Nitrogen dioxide exposure | 2.10E-09    | –                | 26731791, 29410382 | Maternal overweight/obesity                  | 4.30E-10    | –                | 29016858           |
| <i>PDE4DIP</i>    | Nitrogen dioxide exposure                         | 2.10E-09    | –                | 29410382           | Maternal overweight/obesity, fasting glucose | 5.20E-10    | –                | 29016858, 31197173 |
| <i>BSN</i>        | Nitrogen dioxide exposure                         | 2.10E-09    | –                | 29410382           | Maternal overweight/obesity, 1-hour glucose  | 1.40E-09    | –                | 29016858, 33151971 |
| <i>CELSR1</i>     | Nitrogen dioxide exposure                         | 2.10E-09    | –                | 29410382           | Maternal overweight/obesity                  | 2.50E-09    | –                | 29016858           |
| <i>JAKMIP1</i>    | Nitrogen dioxide exposure                         | 2.10E-09    | –                | 29410382           | Maternal overweight/obesity                  | 6.60E-09    | –                | 29016858           |
| <i>LOC619207</i>  | Air pollution exposure, Nitrogen dioxide exposure | 2.10E-09    | –                | 26731791, 29410382 | Maternal overweight/obesity                  | 1.30E-08    | –                | 29016858           |
| <i>NLRC3</i>      | Nitrogen dioxide exposure                         | 2.10E-09    | –                | 29410382           | Maternal overweight/obesity                  | 1.40E-08    | –                | 29016858           |
| <i>C6orf186</i>   | Nitrogen dioxide exposure                         | 2.20E-09    | –                | 29410382           | Maternal overweight/obesity                  | 3.00E-11    | –                | 29016858           |
| <i>ACTA2</i>      | Nitrogen dioxide exposure                         | 2.20E-09    | –                | 29410382           | Maternal overweight/obesity                  | 9.50E-10    | –                | 29016858           |
| <i>DUSP27</i>     | Nitrogen dioxide exposure                         | 2.20E-09    | –                | 29410382           | Maternal overweight/obesity                  | 1.20E-08    | –                | 29016858           |
| <i>BCCIP;UROS</i> | Nitrogen dioxide exposure                         | 2.20E-09    | –                | 29410382           | Maternal overweight/obesity                  | 1.20E-08    | –                | 29016858           |
| <i>TAS2R60</i>    | Nitrogen dioxide exposure                         | 2.20E-09    | –                | 29410382           | Maternal overweight/obesity                  | 3.30E-08    | –                | 29016858           |

| <b>Gene</b>     | <b>Trait1</b>                                                | <b>minP</b> | <b>Direction</b> | <b>PMID</b>        | <b>Trait2</b>                                                                                                                    | <b>minP</b> | <b>Direction</b> | <b>PMID</b>                  |
|-----------------|--------------------------------------------------------------|-------------|------------------|--------------------|----------------------------------------------------------------------------------------------------------------------------------|-------------|------------------|------------------------------|
| <i>PPT2</i>     | Nitrogen dioxide exposure                                    | 2.30E-09    | –                | 29410382           | Maternal overweight/obesity                                                                                                      | 2.60E-12    | –                | 29016858                     |
| <i>MYH14</i>    | Nitrogen dioxide exposure                                    | 2.30E-09    | –                | 29410382           | Maternal overweight/obesity                                                                                                      | 3.00E-10    | –                | 29016858                     |
| <i>WWC1</i>     | Nitrogen dioxide exposure, Particulate matter <2.5um (PM2.5) | 2.30E-09    | –                | 29410382, 31208937 | Maternal overweight/obesity                                                                                                      | 1.50E-09    | –                | 29016858                     |
| <i>PADI1</i>    | Nitrogen dioxide exposure                                    | 2.30E-09    | –                | 29410382           | Maternal overweight/obesity                                                                                                      | 1.70E-09    | –                | 29016858                     |
| <i>PITPNM2</i>  | Nitrogen dioxide exposure                                    | 2.30E-09    | –                | 29410382           | Maternal overweight/obesity, fasting glucose, 1-hour glucose                                                                     | 2.00E-09    | –                | 29016858, 31197173, 33151971 |
| <i>ARHGEF10</i> | Nitrogen dioxide exposure                                    | 2.30E-09    | –                | 29410382           | Maternal overweight/obesity, Triglycerides to total lipids ratio in medium LDL, Triglycerides to total lipids ratio in small LDL | 7.70E-09    | –                | 29016858                     |
| <i>AATK</i>     | Air pollution exposure, Nitrogen dioxide exposure            | 2.30E-09    | –                | 26731791, 29410382 | Maternal overweight/obesity, Triglycerides to total lipids ratio in chylomicrons and XXL-VLDL                                    | 1.10E-08    | –                | 29016858                     |
| <i>RASGRF1</i>  | Nitrogen dioxide exposure, Particulate matter <2.5um (PM2.5) | 2.30E-09    | –                | 29410382           | Maternal overweight/obesity                                                                                                      | 1.30E-08    | –                | 29016858                     |

| <b>Gene</b>      | <b>Trait1</b>                                                                       | <b>minP</b> | <b>Direction</b> | <b>PMID</b>                  | <b>Trait2</b>                                                                                            | <b>minP</b> | <b>Direction</b> | <b>PMID</b>        |
|------------------|-------------------------------------------------------------------------------------|-------------|------------------|------------------------------|----------------------------------------------------------------------------------------------------------|-------------|------------------|--------------------|
| <i>ARNTL</i>     | Nitrogen dioxide exposure                                                           | 2.30E-09    | –                | 29410382                     | Maternal overweight/obesity                                                                              | 1.70E-08    | –                | 29016858           |
| <i>ATP2B4</i>    | Nitrogen dioxide exposure                                                           | 2.30E-09    | –                | 29410382                     | Maternal overweight/obesity                                                                              | 1.80E-08    | –                | 29016858           |
| <i>ZCCHC24</i>   | Nitrogen dioxide exposure                                                           | 2.30E-09    | –                | 29410382                     | Maternal overweight/obesity                                                                              | 3.70E-08    | –                | 29016858           |
| <i>GPR45</i>     | Nitrogen dioxide exposure                                                           | 2.30E-09    | –                | 29410382                     | Maternal overweight/obesity                                                                              | 3.90E-08    | –                | 29016858           |
| <i>SYNJ2</i>     | Nitrogen dioxide exposure                                                           | 2.30E-09    | –                | 29410382                     | Maternal overweight/obesity, fasting glucose                                                             | 4.50E-08    | –                | 29016858, 31197173 |
| <i>LOC154822</i> | Nitrogen dioxide exposure                                                           | 2.30E-09    | –                | 29410382                     | Maternal overweight/obesity                                                                              | 4.80E-08    | –                | 29016858           |
| <i>ARNT2</i>     | Nitrogen dioxide exposure                                                           | 2.40E-09    | –                | 29410382                     | Maternal overweight/obesity, Triglycerides in chylomicrons and extremely large VLDL                      | 3.80E-10    | –                | 29016858           |
| <i>MORNI</i>     | Nitrogen dioxide exposure                                                           | 2.40E-09    | –                | 29410382                     | Maternal overweight/obesity, Diastolic blood pressure, Triglycerides to total lipids ratio in medium HDL | 2.70E-09    | –                | 29016858, 32916427 |
| <i>C15orf50</i>  | Nitrogen dioxide exposure                                                           | 2.40E-09    | –                | 29410382                     | Maternal overweight/obesity                                                                              | 5.40E-09    | –                | 29016858           |
| <i>NFATC1</i>    | Air pollution exposure, Nitrogen dioxide exposure, Particulate matter air pollution | 2.40E-09    | –                | 26731791, 29410382, 32484729 | Maternal overweight/obesity                                                                              | 7.20E-09    | –                | 29016858           |

| <b>Gene</b>              | <b>Trait1</b>                                     | <b>minP</b> | <b>Direction</b> | <b>PMID</b>        | <b>Trait2</b>                               | <b>minP</b> | <b>Direction</b> | <b>PMID</b>        |
|--------------------------|---------------------------------------------------|-------------|------------------|--------------------|---------------------------------------------|-------------|------------------|--------------------|
| <i>AGAP1</i>             | Air pollution exposure, Nitrogen dioxide exposure | 2.40E-09    | –                | 26731791, 29410382 | Maternal overweight/obesity                 | 8.90E-09    | –                | 29016858           |
| <i>NAGPA</i>             | Nitrogen dioxide exposure                         | 2.40E-09    | –                | 29410382           | Maternal overweight/obesity                 | 2.10E-08    | –                | 29016858           |
| <i>NAV2</i>              | Nitrogen dioxide exposure                         | 2.40E-09    | –                | 29410382           | Maternal overweight/obesity                 | 3.80E-08    | –                | 29016858           |
| <i>APOA5</i>             | Nitrogen dioxide exposure                         | 2.50E-09    | –                | 29410382           | Triglycerides, Maternal overweight/obesity  | 9.40E-13    | –                | 25583993, 29016858 |
| <i>PDE9A</i>             | Nitrogen dioxide exposure                         | 2.50E-09    | –                | 29410382           | Maternal overweight/obesity, 1-hour glucose | 7.10E-12    | –                | 29016858, 33151971 |
| <i>CELSR3</i>            | Air pollution exposure, Nitrogen dioxide exposure | 2.50E-09    | –                | 26731791, 29410382 | Maternal overweight/obesity                 | 1.30E-10    | –                | 29016858           |
| <i>SH3PXD2B</i>          | Nitrogen dioxide exposure                         | 2.50E-09    | –                | 29410382           | Maternal overweight/obesity                 | 1.30E-09    | –                | 29016858           |
| <i>LMCD1</i>             | Nitrogen dioxide exposure                         | 2.50E-09    | –                | 29410382           | Maternal overweight/obesity                 | 4.60E-09    | –                | 29016858           |
| <i>CADPS2</i>            | Nitrogen dioxide exposure                         | 2.50E-09    | –                | 29410382           | Maternal overweight/obesity                 | 1.00E-08    | –                | 29016858           |
| <i>F7</i>                | Nitrogen dioxide exposure                         | 2.50E-09    | –                | 29410382           | Maternal overweight/obesity                 | 1.20E-08    | –                | 29016858           |
| <i>PRR5;PRR5-ARHGAP8</i> | Nitrogen dioxide exposure                         | 2.50E-09    | –                | 29410382           | Maternal overweight/obesity                 | 2.80E-08    | –                | 29016858           |
| <i>GMIP</i>              | Nitrogen dioxide exposure                         | 2.50E-09    | –                | 29410382           | Maternal overweight/obesity                 | 2.90E-08    | –                | 29016858           |

| <b>Gene</b>             | <b>Trait1</b>             | <b>minP</b> | <b>Direction</b> | <b>PMID</b> | <b>Trait2</b>                                                                                                                                                                                                                                                                                                                                                                                                                                                      | <b>minP</b> | <b>Direction</b> | <b>PMID</b>                                      |
|-------------------------|---------------------------|-------------|------------------|-------------|--------------------------------------------------------------------------------------------------------------------------------------------------------------------------------------------------------------------------------------------------------------------------------------------------------------------------------------------------------------------------------------------------------------------------------------------------------------------|-------------|------------------|--------------------------------------------------|
| <i>PHGDH</i>            | Nitrogen dioxide exposure | 2.60E-09    | –                | 29410382    | Serum triglycerides, Maternal overweight/obesity, Diastolic Blood Pressure, Systolic Blood Pressure, fasting glucose, Serum total triglycerides, Triglycerides, Triglycerides in HDL, Triglycerides in large VLDL, Triglycerides in medium HDL, Triglycerides in medium VLDL, Triglycerides in small HDL, Triglycerides in small VLDL, Triglycerides in VLDL, Triglycerides to total lipids ratio in medium HDL, Triglycerides to total lipids ratio in small VLDL | 2.70E-34    | –                | 28213390, 29016858, 29198723, 31197173, 32520614 |
| <i>HBBP1</i>            | Nitrogen dioxide exposure | 2.60E-09    | –                | 29410382    | Maternal overweight/obesity                                                                                                                                                                                                                                                                                                                                                                                                                                        | 7.40E-12    | –                | 29016858                                         |
| <i>NPR1</i>             | Nitrogen dioxide exposure | 2.60E-09    | –                | 29410382    | Maternal overweight/obesity                                                                                                                                                                                                                                                                                                                                                                                                                                        | 3.00E-11    | –                | 29016858                                         |
| <i>ALKBH1;C14orf156</i> | Nitrogen dioxide exposure | 2.60E-09    | –                | 29410382    | Maternal overweight/obesity                                                                                                                                                                                                                                                                                                                                                                                                                                        | 2.20E-10    | –                | 29016858                                         |

| <b>Gene</b>     | <b>Trait1</b>                                     | <b>minP</b> | <b>Direction</b> | <b>PMID</b>        | <b>Trait2</b>                                                                                  | <b>minP</b> | <b>Direction</b> | <b>PMID</b>        |
|-----------------|---------------------------------------------------|-------------|------------------|--------------------|------------------------------------------------------------------------------------------------|-------------|------------------|--------------------|
| <i>SNED1</i>    | Air pollution exposure, Nitrogen dioxide exposure | 2.60E-09    | –                | 26731791, 29410382 | Maternal overweight/obesity                                                                    | 1.20E-09    | –                | 29016858           |
| <i>DNAH17</i>   | Air pollution exposure, Nitrogen dioxide exposure | 2.60E-09    | –                | 26731791, 29410382 | Maternal overweight/obesity                                                                    | 2.40E-09    | –                | 29016858           |
| <i>FAM107A</i>  | Air pollution exposure, Nitrogen dioxide exposure | 2.60E-09    | –                | 26731791, 29410382 | Maternal overweight/obesity                                                                    | 4.90E-09    | –                | 29016858           |
| <i>PRPH2</i>    | Nitrogen dioxide exposure                         | 2.60E-09    | –                | 29410382           | Maternal overweight/obesity                                                                    | 8.60E-09    | –                | 29016858           |
| <i>ADAMTSL1</i> | Nitrogen dioxide exposure                         | 2.60E-09    | –                | 29410382           | Maternal overweight/obesity                                                                    | 2.20E-08    | –                | 29016858           |
| <i>SLC39A11</i> | Nitrogen dioxide exposure                         | 2.60E-09    | –                | 29410382           | Maternal overweight/obesity                                                                    | 3.40E-08    | –                | 29016858           |
| <i>DNAH2</i>    | Nitrogen dioxide exposure                         | 2.60E-09    | –                | 29410382           | Maternal overweight/obesity, 1-hour glucose, Triglycerides to total lipids ratio in small VLDL | 4.00E-08    | –                | 29016858, 33151971 |
| <i>GUCA2A</i>   | Nitrogen dioxide exposure                         | 2.60E-09    | –                | 29410382           | Maternal overweight/obesity                                                                    | 4.50E-08    | –                | 29016858           |
| <i>LRRC8D</i>   | Nitrogen dioxide exposure                         | 2.70E-09    | –                | 29410382           | Maternal overweight/obesity, Diastolic Blood Pressure, Systolic Blood Pressure                 | 3.30E-10    | –                | 29016858, 29198723 |
| <i>SH3RF3</i>   | Nitrogen dioxide exposure                         | 2.70E-09    | –                | 29410382           | Maternal overweight/obesity                                                                    | 3.50E-10    | –                | 29016858           |
| <i>GPR89A</i>   | Nitrogen dioxide exposure                         | 2.70E-09    | –                | 29410382           | Maternal overweight/obesity                                                                    | 1.10E-08    | –                | 29016858           |

| <b>Gene</b>    | <b>Trait1</b>                                     | <b>minP</b> | <b>Direction</b> | <b>PMID</b>        | <b>Trait2</b>                                                                                                                                                                           | <b>minP</b> | <b>Direction</b> | <b>PMID</b>        |
|----------------|---------------------------------------------------|-------------|------------------|--------------------|-----------------------------------------------------------------------------------------------------------------------------------------------------------------------------------------|-------------|------------------|--------------------|
| <i>TFIP11</i>  | Nitrogen dioxide exposure                         | 2.70E-09    | –                | 29410382           | Maternal overweight/obesity                                                                                                                                                             | 1.20E-08    | –                | 29016858           |
| <i>CDH23</i>   | Nitrogen dioxide exposure                         | 2.70E-09    | –                | 29410382           | Maternal overweight/obesity, Systolic blood pressure                                                                                                                                    | 1.70E-08    | –                | 29016858           |
| <i>ALK</i>     | Nitrogen dioxide exposure                         | 2.70E-09    | –                | 29410382           | Maternal overweight/obesity                                                                                                                                                             | 1.90E-08    | –                | 29016858           |
| <i>TTBK1</i>   | Air pollution exposure, Nitrogen dioxide exposure | 2.70E-09    | –                | 26731791, 29410382 | Maternal overweight/obesity                                                                                                                                                             | 2.80E-08    | –                | 29016858           |
| <i>RAI14</i>   | Nitrogen dioxide exposure                         | 2.70E-09    | –                | 29410382           | Maternal overweight/obesity                                                                                                                                                             | 3.70E-08    | –                | 29016858           |
| <i>ST7</i>     | Nitrogen dioxide exposure                         | 2.70E-09    | –                | 29410382           | Maternal overweight/obesity                                                                                                                                                             | 4.90E-08    | –                | 29016858           |
| <i>BDH1</i>    | Nitrogen dioxide exposure                         | 2.80E-09    | –                | 29410382           | Maternal overweight/obesity                                                                                                                                                             | 1.60E-12    | –                | 29016858           |
| <i>CACNA1H</i> | Nitrogen dioxide exposure                         | 2.80E-09    | –                | 29410382           | Maternal overweight/obesity, Triglycerides to total lipids ratio in small HDL, Triglycerides to total lipids ratio in small LDL, Triglycerides to total lipids ratio in very small VLDL | 7.60E-11    | –                | 29016858, 32916427 |
| <i>CA12</i>    | Nitrogen dioxide exposure                         | 2.80E-09    | –                | 29410382           | Maternal overweight/obesity                                                                                                                                                             | 1.30E-10    | –                | 29016858           |
| <i>SOCS7</i>   | Nitrogen dioxide exposure                         | 2.80E-09    | –                | 29410382           | Maternal overweight/obesity, Triglycerides to                                                                                                                                           | 2.50E-10    | –                | 29016858           |

| Gene                | Trait1                                                                              | minP     | Direction | PMID                         | Trait2                                                               | minP     | Direction | PMID                         |
|---------------------|-------------------------------------------------------------------------------------|----------|-----------|------------------------------|----------------------------------------------------------------------|----------|-----------|------------------------------|
|                     |                                                                                     |          |           |                              | total lipids ratio in very large VLDL                                |          |           |                              |
| <i>MTUS2</i>        | Nitrogen dioxide exposure                                                           | 2.80E-09 | –         | 29410382                     | Maternal overweight/obesity                                          | 1.10E-09 | –         | 29016858, 32916427           |
| <i>CSMD1</i>        | Nitrogen dioxide exposure                                                           | 2.80E-09 | –         | 29410382                     | Maternal overweight/obesity                                          | 3.20E-09 | –         | 29016858                     |
| <i>MSH5</i>         | Nitrogen dioxide exposure                                                           | 2.80E-09 | –         | 29410382                     | Maternal overweight/obesity                                          | 7.40E-09 | –         | 29016858                     |
| <i>CAMTA1</i>       | Nitrogen dioxide exposure                                                           | 2.80E-09 | –         | 29410382                     | Maternal overweight/obesity, 1-hour glucose                          | 9.70E-09 | –         | 29016858, 32916427, 33151971 |
| <i>ETV3L</i>        | Nitrogen dioxide exposure                                                           | 2.80E-09 | –         | 29410382                     | Maternal overweight/obesity                                          | 2.90E-08 | –         | 29016858                     |
| <i>LOC100133669</i> | Air pollution exposure, Nitrogen dioxide exposure                                   | 2.80E-09 | –         | 26731791, 29410382           | Maternal overweight/obesity                                          | 3.10E-08 | –         | 29016858                     |
| <i>PRCD</i>         | Nitrogen dioxide exposure                                                           | 2.90E-09 | –         | 29410382                     | Maternal overweight/obesity                                          | 6.00E-11 | –         | 29016858                     |
| <i>NXN</i>          | Air pollution exposure, Nitrogen dioxide exposure, Particulate matter air pollution | 2.90E-09 | –         | 26731791, 29410382, 32484729 | Maternal overweight/obesity, 1-hour glucose, Systolic blood pressure | 1.10E-08 | –         | 29016858, 33151971           |
| <i>EXT2</i>         | Nitrogen dioxide exposure                                                           | 2.90E-09 | –         | 29410382                     | Maternal overweight/obesity                                          | 1.90E-08 | –         | 29016858                     |
| <i>RASGEF1C</i>     | Nitrogen dioxide exposure                                                           | 2.90E-09 | –         | 29410382                     | Maternal overweight/obesity                                          | 2.60E-08 | –         | 29016858                     |



| <b>Gene</b>              | <b>Trait1</b>             | <b>minP</b> | <b>Direction</b> | <b>PMID</b> | <b>Trait2</b>                               | <b>minP</b> | <b>Direction</b> | <b>PMID</b>        |
|--------------------------|---------------------------|-------------|------------------|-------------|---------------------------------------------|-------------|------------------|--------------------|
| <i>HDDC3;UN<br/>C45A</i> | Nitrogen dioxide exposure | 2.90E-09    | -                | 29410382    | Maternal overweight/obesity                 | 3.10E-08    | -                | 29016858           |
| <i>TAP2</i>              | Nitrogen dioxide exposure | 3.00E-09    | -                | 29410382    | Maternal overweight/obesity                 | 2.30E-11    | -                | 29016858           |
| <i>ANKDD1A</i>           | Nitrogen dioxide exposure | 3.00E-09    | -                | 29410382    | Maternal overweight/obesity                 | 1.80E-10    | -                | 29016858           |
| <i>TNK2</i>              | Nitrogen dioxide exposure | 3.00E-09    | -                | 29410382    | Maternal overweight/obesity                 | 4.30E-10    | -                | 29016858           |
| <i>EML1</i>              | Nitrogen dioxide exposure | 3.00E-09    | -                | 29410382    | Maternal overweight/obesity                 | 1.50E-09    | -                | 29016858           |
| <i>ODZ4</i>              | Nitrogen dioxide exposure | 3.00E-09    | -                | 29410382    | Maternal overweight/obesity                 | 5.40E-09    | -                | 29016858           |
| <i>CD48</i>              | Nitrogen dioxide exposure | 3.00E-09    | +                | 29410382    | Maternal overweight/obesity                 | 1.20E-08    | +                | 29016858           |
| <i>CLEC4A</i>            | Nitrogen dioxide exposure | 3.00E-09    | -                | 29410382    | Maternal overweight/obesity                 | 1.30E-08    | -                | 29016858           |
| <i>SCOC</i>              | Nitrogen dioxide exposure | 3.00E-09    | -                | 29410382    | Maternal overweight/obesity                 | 1.90E-08    | -                | 29016858           |
| <i>CABIN1</i>            | Nitrogen dioxide exposure | 3.00E-09    | -                | 29410382    | Maternal overweight/obesity                 | 2.50E-08    | -                | 29016858           |
| <i>BCL2</i>              | Nitrogen dioxide exposure | 3.00E-09    | +                | 29410382    | Maternal overweight/obesity                 | 2.80E-08    | +                | 29016858           |
| <i>PZP</i>               | Nitrogen dioxide exposure | 3.10E-09    | -                | 29410382    | Maternal overweight/obesity                 | 6.60E-11    | -                | 29016858           |
| <i>RGS6</i>              | Nitrogen dioxide exposure | 3.10E-09    | -                | 29410382    | Maternal overweight/obesity, 1-hour glucose | 6.70E-10    | -                | 29016858, 33151971 |
| <i>C4orf29</i>           | Nitrogen dioxide exposure | 3.10E-09    | -                | 29410382    | Maternal overweight/obesity                 | 7.10E-10    | -                | 29016858           |
| <i>CHTF18</i>            | Nitrogen dioxide exposure | 3.10E-09    | -                | 29410382    | Maternal overweight/obesity                 | 8.80E-10    | -                | 29016858           |

| <b>Gene</b>         | <b>Trait1</b>             | <b>minP</b> | <b>Direction</b> | <b>PMID</b> | <b>Trait2</b>                                                                                                                            | <b>minP</b> | <b>Direction</b> | <b>PMID</b>        |
|---------------------|---------------------------|-------------|------------------|-------------|------------------------------------------------------------------------------------------------------------------------------------------|-------------|------------------|--------------------|
| <i>CLSTN1</i>       | Nitrogen dioxide exposure | 3.10E-09    | –                | 29410382    | Maternal overweight/obesity                                                                                                              | 1.00E-09    | –                | 29016858           |
| <i>SSTR3</i>        | Nitrogen dioxide exposure | 3.10E-09    | –                | 29410382    | Maternal overweight/obesity                                                                                                              | 4.10E-09    | –                | 29016858           |
| <i>CISH</i>         | Nitrogen dioxide exposure | 3.10E-09    | –                | 29410382    | Maternal overweight/obesity, Triglycerides in large VLDL, Triglycerides in medium HDL, Triglycerides to total lipids ratio in small VLDL | 6.60E-09    | –                | 29016858           |
| <i>CLIP2</i>        | Nitrogen dioxide exposure | 3.10E-09    | –                | 29410382    | Maternal overweight/obesity                                                                                                              | 9.20E-09    | –                | 29016858           |
| <i>NUPR1</i>        | Nitrogen dioxide exposure | 3.10E-09    | –                | 29410382    | Maternal overweight/obesity                                                                                                              | 1.30E-08    | –                | 29016858           |
| <i>SYNGAP1</i>      | Nitrogen dioxide exposure | 3.10E-09    | –                | 29410382    | Maternal overweight/obesity                                                                                                              | 1.90E-08    | –                | 29016858           |
| <i>FLNB</i>         | Nitrogen dioxide exposure | 3.10E-09    | –                | 29410382    | Maternal overweight/obesity, 1-hour glucose                                                                                              | 2.20E-08    | –                | 29016858, 33151971 |
| <i>ZNF837</i>       | Nitrogen dioxide exposure | 3.20E-09    | –                | 29410382    | Maternal overweight/obesity                                                                                                              | 1.90E-10    | –                | 29016858           |
| <i>C7orf54;SND1</i> | Nitrogen dioxide exposure | 3.20E-09    | –                | 29410382    | Maternal overweight/obesity                                                                                                              | 3.10E-09    | –                | 29016858           |
| <i>ARHGAP10</i>     | Nitrogen dioxide exposure | 3.20E-09    | –                | 29410382    | Maternal overweight/obesity                                                                                                              | 4.40E-09    | –                | 29016858           |
| <i>PRKCA</i>        | Nitrogen dioxide exposure | 3.20E-09    | –                | 29410382    | Maternal overweight/obesity                                                                                                              | 4.50E-09    | –                | 29016858           |
| <i>CPNE9</i>        | Nitrogen dioxide exposure | 3.20E-09    | –                | 29410382    | Maternal overweight/obesity                                                                                                              | 2.20E-08    | –                | 29016858           |

| <b>Gene</b>     | <b>Trait1</b>                                     | <b>minP</b> | <b>Direction</b> | <b>PMID</b>        | <b>Trait2</b>                                                                                     | <b>minP</b> | <b>Direction</b> | <b>PMID</b>        |
|-----------------|---------------------------------------------------|-------------|------------------|--------------------|---------------------------------------------------------------------------------------------------|-------------|------------------|--------------------|
| <i>RLN3</i>     | Nitrogen dioxide exposure                         | 3.20E-09    | –                | 29410382           | Maternal overweight/obesity                                                                       | 4.00E-08    | –                | 29016858           |
| <i>WSCD1</i>    | Nitrogen dioxide exposure                         | 3.30E-09    | –                | 29410382           | Maternal overweight/obesity                                                                       | 1.50E-11    | –                | 29016858           |
| <i>PACS2</i>    | Nitrogen dioxide exposure                         | 3.30E-09    | –                | 29410382           | Maternal overweight/obesity, Ratio of triglycerides to phosphoglycerides, Systolic blood pressure | 2.20E-10    | –                | 29016858           |
| <i>TRIM10</i>   | Nitrogen dioxide exposure                         | 3.30E-09    | –                | 29410382           | Maternal overweight/obesity                                                                       | 8.20E-10    | –                | 29016858           |
| <i>TBC1D16</i>  | Air pollution exposure, Nitrogen dioxide exposure | 3.30E-09    | –                | 26731791, 29410382 | Maternal overweight/obesity, Diastolic blood pressure                                             | 3.70E-09    | –                | 29016858           |
| <i>CDRT4</i>    | Nitrogen dioxide exposure                         | 3.30E-09    | –                | 29410382           | Maternal overweight/obesity                                                                       | 9.30E-09    | –                | 29016858           |
| <i>LPPR2</i>    | Nitrogen dioxide exposure                         | 3.30E-09    | –                | 29410382           | Maternal overweight/obesity, 1-hour glucose                                                       | 1.00E-08    | –                | 29016858, 33151971 |
| <i>TCF23</i>    | Nitrogen dioxide exposure                         | 3.30E-09    | –                | 29410382           | Maternal overweight/obesity                                                                       | 1.80E-08    | –                | 29016858           |
| <i>C14orf68</i> | Nitrogen dioxide exposure                         | 3.30E-09    | –                | 29410382           | Maternal overweight/obesity                                                                       | 2.90E-08    | –                | 29016858           |
| <i>A2LD1</i>    | Nitrogen dioxide exposure                         | 3.30E-09    | –                | 29410382           | Maternal overweight/obesity                                                                       | 4.50E-08    | –                | 29016858           |
| <i>QSOX1</i>    | Nitrogen dioxide exposure                         | 3.40E-09    | –                | 29410382           | Maternal overweight/obesity                                                                       | 1.40E-10    | –                | 29016858           |
| <i>UBXN6</i>    | Nitrogen dioxide exposure                         | 3.40E-09    | –                | 29410382           | Maternal overweight/obesity                                                                       | 6.30E-10    | –                | 29016858           |

| <b>Gene</b>     | <b>Trait1</b>                                     | <b>minP</b> | <b>Direction</b> | <b>PMID</b>        | <b>Trait2</b>                                           | <b>minP</b> | <b>Direction</b> | <b>PMID</b>        |
|-----------------|---------------------------------------------------|-------------|------------------|--------------------|---------------------------------------------------------|-------------|------------------|--------------------|
| <i>ROR2</i>     | Nitrogen dioxide exposure                         | 3.40E-09    | –                | 29410382           | Maternal overweight/obesity                             | 1.40E-09    | –                | 29016858           |
| <i>JUB</i>      | Nitrogen dioxide exposure                         | 3.40E-09    | –                | 29410382           | Maternal overweight/obesity                             | 4.30E-09    | –                | 29016858, 32916427 |
| <i>CHIT1</i>    | Nitrogen dioxide exposure                         | 3.40E-09    | –                | 29410382           | Maternal overweight/obesity                             | 3.00E-08    | –                | 29016858           |
| <i>TP53I11</i>  | Nitrogen dioxide exposure                         | 3.40E-09    | –                | 29410382           | Maternal overweight/obesity, Triglycerides              | 4.50E-08    | –                | 29016858, 31910897 |
| <i>DGCR9</i>    | Nitrogen dioxide exposure                         | 3.50E-09    | –                | 29410382           | Maternal overweight/obesity                             | 1.10E-11    | –                | 29016858           |
| <i>LMF1</i>     | Air pollution exposure, Nitrogen dioxide exposure | 3.50E-09    | –                | 26731791, 29410382 | Maternal overweight/obesity, Triglycerides in small LDL | 5.40E-10    | –                | 29016858           |
| <i>HDAC11</i>   | Nitrogen dioxide exposure                         | 3.50E-09    | –                | 29410382           | Maternal overweight/obesity                             | 1.50E-09    | –                | 29016858           |
| <i>CIITA</i>    | Nitrogen dioxide exposure                         | 3.50E-09    | –                | 29410382           | Maternal overweight/obesity                             | 4.10E-09    | –                | 29016858           |
| <i>GPR39</i>    | Nitrogen dioxide exposure                         | 3.50E-09    | –                | 29410382           | Maternal overweight/obesity                             | 8.60E-09    | –                | 29016858           |
| <i>RHOBTB2</i>  | Nitrogen dioxide exposure                         | 3.50E-09    | –                | 29410382           | Maternal overweight/obesity                             | 1.00E-08    | –                | 29016858           |
| <i>AKNAD1</i>   | Nitrogen dioxide exposure                         | 3.50E-09    | –                | 29410382           | Maternal overweight/obesity                             | 4.40E-08    | –                | 29016858           |
| <i>C6orf168</i> | Air pollution exposure, Nitrogen dioxide exposure | 3.60E-09    | –                | 26731791, 29410382 | Maternal overweight/obesity                             | 5.80E-11    | –                | 29016858           |
| <i>IGFALS</i>   | Nitrogen dioxide exposure                         | 3.60E-09    | –                | 29410382           | Maternal overweight/obesity                             | 3.90E-09    | –                | 29016858           |

| <b>Gene</b>     | <b>Trait1</b>                                                                       | <b>minP</b> | <b>Direction</b> | <b>PMID</b>                  | <b>Trait2</b>                                                                                 | <b>minP</b> | <b>Direction</b> | <b>PMID</b> |
|-----------------|-------------------------------------------------------------------------------------|-------------|------------------|------------------------------|-----------------------------------------------------------------------------------------------|-------------|------------------|-------------|
| <i>ZNF20</i>    | Nitrogen dioxide exposure                                                           | 3.60E-09    | –                | 29410382                     | Maternal overweight/obesity                                                                   | 4.60E-09    | –                | 29016858    |
| <i>VPS18</i>    | Nitrogen dioxide exposure                                                           | 3.60E-09    | –                | 29410382                     | Maternal overweight/obesity, Triglycerides to total lipids ratio in chylomicrons and XXL-VLDL | 1.60E-08    | –                | 29016858    |
| <i>MAPT;STH</i> | Nitrogen dioxide exposure                                                           | 3.60E-09    | –                | 29410382                     | Maternal overweight/obesity                                                                   | 3.50E-08    | –                | 29016858    |
| <i>CYP3A7</i>   | Nitrogen dioxide exposure                                                           | 3.70E-09    | –                | 29410382                     | Maternal overweight/obesity                                                                   | 4.20E-13    | –                | 29016858    |
| <i>JPH3</i>     | Nitrogen dioxide exposure                                                           | 3.70E-09    | –                | 29410382                     | Maternal overweight/obesity                                                                   | 2.00E-10    | –                | 29016858    |
| <i>FAM179A</i>  | Nitrogen dioxide exposure                                                           | 3.70E-09    | –                | 29410382                     | Maternal overweight/obesity                                                                   | 4.50E-10    | –                | 29016858    |
| <i>C7orf50</i>  | Air pollution exposure, Nitrogen dioxide exposure, Particulate matter ≤10 um (PM10) | 3.70E-09    | –                | 26731791, 29410382, 31148503 | Maternal overweight/obesity, HDL cholesterol                                                  | 6.70E-09    | –                | 29016858    |
| <i>ZNF792</i>   | Nitrogen dioxide exposure                                                           | 3.70E-09    | –                | 29410382                     | Maternal overweight/obesity                                                                   | 1.00E-08    | –                | 29016858    |
| <i>OR2S2</i>    | Nitrogen dioxide exposure                                                           | 3.70E-09    | –                | 29410382                     | Maternal overweight/obesity                                                                   | 1.40E-08    | –                | 29016858    |
| <i>BEND6</i>    | Nitrogen dioxide exposure                                                           | 3.70E-09    | –                | 29410382                     | Maternal overweight/obesity                                                                   | 2.40E-08    | –                | 29016858    |
| <i>ZFH3</i>     | Nitrogen dioxide exposure                                                           | 3.80E-09    | –                | 29410382                     | Maternal overweight/obesity                                                                   | 2.00E-11    | –                | 29016858    |
| <i>SH3TC2</i>   | Nitrogen dioxide exposure                                                           | 3.80E-09    | –                | 29410382                     | Maternal overweight/obesity                                                                   | 5.80E-11    | –                | 29016858    |

| <b>Gene</b>                     | <b>Trait1</b>                                     | <b>minP</b> | <b>Direction</b> | <b>PMID</b>        | <b>Trait2</b>                                | <b>minP</b> | <b>Direction</b> | <b>PMID</b>        |
|---------------------------------|---------------------------------------------------|-------------|------------------|--------------------|----------------------------------------------|-------------|------------------|--------------------|
| <i>SLC22A18;S<br/>LC22A18AS</i> | Nitrogen dioxide exposure                         | 3.80E-09    | –                | 29410382           | Maternal overweight/obesity, fasting glucose | 3.10E-10    | –                | 29016858, 31197173 |
| <i>OR6P1</i>                    | Nitrogen dioxide exposure                         | 3.80E-09    | –                | 29410382           | Maternal overweight/obesity                  | 1.40E-09    | –                | 29016858           |
| <i>C1orf127</i>                 | Nitrogen dioxide exposure                         | 3.80E-09    | –                | 29410382           | Maternal overweight/obesity, Glucose         | 3.40E-08    | –                | 29016858           |
| <i>CDH4</i>                     | Air pollution exposure, Nitrogen dioxide exposure | 3.80E-09    | –                | 26731791, 29410382 | Maternal overweight/obesity                  | 4.70E-08    | –                | 29016858           |
| <i>WNT9A</i>                    | Nitrogen dioxide exposure                         | 3.80E-09    | –                | 29410382           | Maternal overweight/obesity                  | 4.70E-08    | –                | 29016858           |
| <i>BAI2</i>                     | Air pollution exposure, Nitrogen dioxide exposure | 3.90E-09    | –                | 26731791, 29410382 | Maternal overweight/obesity                  | 7.50E-11    | –                | 29016858           |
| <i>RFTN1</i>                    | Nitrogen dioxide exposure                         | 3.90E-09    | –                | 29410382           | Maternal overweight/obesity                  | 2.40E-10    | –                | 29016858           |
| <i>DIRC3</i>                    | Nitrogen dioxide exposure                         | 3.90E-09    | –                | 29410382           | Maternal overweight/obesity                  | 5.40E-10    | –                | 29016858           |
| <i>CRHR1</i>                    | Nitrogen dioxide exposure                         | 3.90E-09    | –                | 29410382           | Maternal overweight/obesity                  | 1.10E-09    | –                | 29016858           |
| <i>COL4A1</i>                   | Nitrogen dioxide exposure                         | 3.90E-09    | –                | 29410382           | Maternal overweight/obesity                  | 2.90E-09    | –                | 29016858           |
| <i>CUX2</i>                     | Nitrogen dioxide exposure                         | 3.90E-09    | –                | 29410382           | Maternal overweight/obesity                  | 3.30E-09    | –                | 29016858           |
| <i>KLK13</i>                    | Nitrogen dioxide exposure                         | 3.90E-09    | –                | 29410382           | Maternal overweight/obesity                  | 8.80E-09    | –                | 29016858           |
| <i>DLG5</i>                     | Nitrogen dioxide exposure                         | 3.90E-09    | –                | 29410382           | Maternal overweight/obesity                  | 1.30E-08    | –                | 29016858           |

| <b>Gene</b>    | <b>Trait1</b>                                     | <b>minP</b> | <b>Direction</b> | <b>PMID</b>        | <b>Trait2</b>                                                                                                            | <b>minP</b> | <b>Direction</b> | <b>PMID</b>        |
|----------------|---------------------------------------------------|-------------|------------------|--------------------|--------------------------------------------------------------------------------------------------------------------------|-------------|------------------|--------------------|
| <i>DLGAP2</i>  | Air pollution exposure, Nitrogen dioxide exposure | 3.90E-09    | –                | 26731791, 29410382 | Maternal overweight/obesity                                                                                              | 1.50E-08    | –                | 29016858           |
| <i>HS3ST4</i>  | Nitrogen dioxide exposure                         | 3.90E-09    | –                | 29410382           | Maternal overweight/obesity                                                                                              | 4.40E-08    | –                | 29016858           |
| <i>PSMB9</i>   | Nitrogen dioxide exposure                         | 4.00E-09    | –                | 29410382           | Maternal overweight/obesity                                                                                              | 5.50E-09    | –                | 29016858           |
| <i>KIRREL</i>  | Nitrogen dioxide exposure                         | 4.00E-09    | –                | 29410382           | Maternal overweight/obesity                                                                                              | 6.10E-09    | –                | 29016858           |
| <i>ZNF831</i>  | Nitrogen dioxide exposure                         | 4.00E-09    | –                | 29410382           | Maternal overweight/obesity                                                                                              | 6.50E-09    | –                | 29016858           |
| <i>RASL10B</i> | Nitrogen dioxide exposure                         | 4.00E-09    | –                | 29410382           | Maternal overweight/obesity                                                                                              | 2.70E-08    | –                | 29016858           |
| <i>FAM107B</i> | Nitrogen dioxide exposure                         | 4.00E-09    | –                | 29410382           | Maternal overweight/obesity                                                                                              | 3.20E-08    | –                | 29016858           |
| <i>TTC7A</i>   | Nitrogen dioxide exposure                         | 4.10E-09    | –                | 29410382           | Maternal overweight/obesity                                                                                              | 2.20E-10    | –                | 29016858           |
| <i>RHBDF1</i>  | Nitrogen dioxide exposure                         | 4.10E-09    | –                | 29410382           | Maternal overweight/obesity                                                                                              | 4.70E-10    | –                | 29016858           |
| <i>FOXJ1</i>   | Nitrogen dioxide exposure                         | 4.10E-09    | –                | 29410382           | Maternal overweight/obesity                                                                                              | 7.40E-09    | –                | 29016858           |
| <i>TCF7L1</i>  | Nitrogen dioxide exposure                         | 4.10E-09    | –                | 29410382           | Maternal overweight/obesity, Triglycerides in medium VLDL, Triglycerides in small VLDL, Triglycerides in very small VLDL | 4.00E-08    | –                | 29016858           |
| <i>VAV2</i>    | Nitrogen dioxide exposure                         | 4.20E-09    | –                | 29410382           | Maternal overweight/obesity, 1-hour glucose                                                                              | 8.10E-13    | –                | 29016858, 33151971 |

| <b>Gene</b>    | <b>Trait1</b>             | <b>minP</b> | <b>Direction</b> | <b>PMID</b> | <b>Trait2</b>                                                                  | <b>minP</b> | <b>Direction</b> | <b>PMID</b> |
|----------------|---------------------------|-------------|------------------|-------------|--------------------------------------------------------------------------------|-------------|------------------|-------------|
| <i>TP73</i>    | Nitrogen dioxide exposure | 4.20E-09    | –                | 29410382    | Maternal overweight/obesity                                                    | 4.70E-09    | –                | 29016858    |
| <i>EMP1</i>    | Nitrogen dioxide exposure | 4.20E-09    | –                | 29410382    | Maternal overweight/obesity                                                    | 7.50E-09    | –                | 29016858    |
| <i>TRPM3</i>   | Nitrogen dioxide exposure | 4.30E-09    | –                | 29410382    | Maternal overweight/obesity                                                    | 1.40E-09    | –                | 29016858    |
| <i>MMP15</i>   | Nitrogen dioxide exposure | 4.30E-09    | –                | 29410382    | Maternal overweight/obesity                                                    | 2.70E-09    | –                | 29016858    |
| <i>TMEM119</i> | Nitrogen dioxide exposure | 4.30E-09    | –                | 29410382    | Maternal overweight/obesity                                                    | 1.10E-08    | –                | 29016858    |
| <i>CELA1</i>   | Nitrogen dioxide exposure | 4.30E-09    | –                | 29410382    | Maternal overweight/obesity                                                    | 1.60E-08    | –                | 29016858    |
| <i>RADIL</i>   | Nitrogen dioxide exposure | 4.30E-09    | –                | 29410382    | Maternal overweight/obesity                                                    | 2.50E-08    | –                | 29016858    |
| <i>UCN</i>     | Nitrogen dioxide exposure | 4.30E-09    | –                | 29410382    | Maternal overweight/obesity                                                    | 3.20E-08    | –                | 29016858    |
| <i>MAP3K9</i>  | Nitrogen dioxide exposure | 4.40E-09    | –                | 29410382    | Maternal overweight/obesity                                                    | 3.50E-10    | –                | 29016858    |
| <i>LOXL2</i>   | Nitrogen dioxide exposure | 4.40E-09    | –                | 29410382    | Maternal overweight/obesity                                                    | 4.40E-10    | –                | 29016858    |
| <i>RPUSD1</i>  | Nitrogen dioxide exposure | 4.40E-09    | –                | 29410382    | Maternal overweight/obesity                                                    | 2.20E-09    | –                | 29016858    |
| <i>IL1F7</i>   | Nitrogen dioxide exposure | 4.40E-09    | –                | 29410382    | Maternal overweight/obesity, Triglycerides to total lipids ratio in large VLDL | 2.50E-09    | –                | 29016858    |
| <i>CCDC136</i> | Nitrogen dioxide exposure | 4.40E-09    | –                | 29410382    | Maternal overweight/obesity                                                    | 1.30E-08    | –                | 29016858    |
| <i>PLCB3</i>   | Nitrogen dioxide exposure | 4.50E-09    | –                | 29410382    | Maternal overweight/obesity                                                    | 4.10E-10    | –                | 29016858    |
| <i>LACRT</i>   | Nitrogen dioxide exposure | 4.50E-09    | –                | 29410382    | Maternal overweight/obesity                                                    | 8.30E-09    | –                | 29016858    |



| <b>Gene</b>     | <b>Trait1</b>                                     | <b>minP</b> | <b>Direction</b> | <b>PMID</b>        | <b>Trait2</b>                                                                                                                                                                                                                                                                 | <b>minP</b> | <b>Direction</b> | <b>PMID</b>        |
|-----------------|---------------------------------------------------|-------------|------------------|--------------------|-------------------------------------------------------------------------------------------------------------------------------------------------------------------------------------------------------------------------------------------------------------------------------|-------------|------------------|--------------------|
| <i>ITLN1</i>    | Nitrogen dioxide exposure                         | 4.50E-09    | -                | 29410382           | Maternal overweight/obesity                                                                                                                                                                                                                                                   | 1.20E-08    | -                | 29016858           |
| <i>KIF1A</i>    | Nitrogen dioxide exposure                         | 4.50E-09    | -                | 29410382           | Maternal overweight/obesity                                                                                                                                                                                                                                                   | 1.30E-08    | -                | 29016858           |
| <i>RNF220</i>   | Air pollution exposure, Nitrogen dioxide exposure | 4.50E-09    | -                | 26731791, 29410382 | Maternal overweight/obesity                                                                                                                                                                                                                                                   | 1.50E-08    | -                | 29016858           |
| <i>CCDC85C</i>  | Air pollution exposure, Nitrogen dioxide exposure | 4.60E-09    | -                | 26731791, 29410382 | Maternal overweight/obesity, fasting glucose                                                                                                                                                                                                                                  | 1.40E-09    | -                | 29016858, 31197173 |
| <i>ARHGAP26</i> | Nitrogen dioxide exposure                         | 4.60E-09    | -                | 29410382           | Maternal overweight/obesity, Triglycerides in small HDL, Triglycerides in small VLDL, Triglycerides in very small VLDL, Triglycerides to total lipids ratio in large LDL, Triglycerides to total lipids ratio in medium HDL, Triglycerides to total lipids ratio in small HDL | 1.10E-08    | -                | 29016858           |
| <i>SYT16</i>    | Nitrogen dioxide exposure                         | 4.60E-09    | -                | 29410382           | Maternal overweight/obesity                                                                                                                                                                                                                                                   | 1.80E-08    | -                | 29016858           |
| <i>ZP1</i>      | Nitrogen dioxide exposure                         | 4.60E-09    | +                | 29410382           | Maternal overweight/obesity                                                                                                                                                                                                                                                   | 2.40E-08    | +                | 29016858           |
| <i>PHACTR2</i>  | Nitrogen dioxide exposure                         | 4.60E-09    | -                | 29410382           | Maternal overweight/obesity                                                                                                                                                                                                                                                   | 4.50E-08    | -                | 29016858           |

| <b>Gene</b>         | <b>Trait1</b>                                     | <b>minP</b> | <b>Direction</b> | <b>PMID</b>        | <b>Trait2</b>                                                                                       | <b>minP</b> | <b>Direction</b> | <b>PMID</b>        |
|---------------------|---------------------------------------------------|-------------|------------------|--------------------|-----------------------------------------------------------------------------------------------------|-------------|------------------|--------------------|
| <i>ATP1B1</i>       | Nitrogen dioxide exposure                         | 4.70E-09    | –                | 29410382           | Maternal overweight/obesity                                                                         | 2.90E-12    | –                | 29016858           |
| <i>PTPN21</i>       | Nitrogen dioxide exposure                         | 4.70E-09    | –                | 29410382           | Maternal overweight/obesity                                                                         | 2.80E-10    | –                | 29016858           |
| <i>RHBG</i>         | Nitrogen dioxide exposure                         | 4.70E-09    | –                | 29410382           | Maternal overweight/obesity                                                                         | 9.00E-10    | –                | 29016858           |
| <i>PHLDB1</i>       | Air pollution exposure, Nitrogen dioxide exposure | 4.70E-09    | –                | 26731791, 29410382 | Maternal overweight/obesity                                                                         | 6.60E-09    | –                | 29016858           |
| <i>CYB561D1</i>     | Nitrogen dioxide exposure                         | 4.70E-09    | –                | 29410382           | Maternal overweight/obesity                                                                         | 1.30E-08    | –                | 29016858           |
| <i>TG;SLA</i>       | Nitrogen dioxide exposure                         | 4.70E-09    | –                | 29410382           | Maternal overweight/obesity                                                                         | 1.50E-08    | –                | 29016858           |
| <i>STRA8</i>        | Nitrogen dioxide exposure                         | 4.70E-09    | –                | 29410382           | Maternal overweight/obesity                                                                         | 1.90E-08    | –                | 29016858           |
| <i>HCRTR1</i>       | Nitrogen dioxide exposure                         | 4.70E-09    | –                | 29410382           | Maternal overweight/obesity, Triglycerides in very small VLDL                                       | 4.60E-08    | –                | 29016858           |
| <i>FCHSD2</i>       | Nitrogen dioxide exposure                         | 4.80E-09    | –                | 29410382           | Obesity                                                                                             | 2.50E-09    | –                | 32788176           |
| <i>SEMA4G</i>       | Nitrogen dioxide exposure                         | 4.80E-09    | –                | 29410382           | Maternal overweight/obesity                                                                         | 3.70E-09    | –                | 29016858           |
| <i>LOC100129066</i> | Air pollution exposure, Nitrogen dioxide exposure | 4.80E-09    | –                | 26731791, 29410382 | Maternal overweight/obesity                                                                         | 9.40E-09    | –                | 29016858           |
| <i>DAGLA</i>        | Air pollution exposure, Nitrogen dioxide exposure | 4.80E-09    | –                | 26731791, 29410382 | Maternal overweight/obesity, 1-hour glucose, Triglycerides to total lipids ratio in very large VLDL | 1.40E-08    | –                | 29016858, 33151971 |

| <b>Gene</b>      | <b>Trait1</b>                                     | <b>minP</b> | <b>Direction</b> | <b>PMID</b>        | <b>Trait2</b>                                                                                                                                                                                                                        | <b>minP</b> | <b>Direction</b> | <b>PMID</b>        |
|------------------|---------------------------------------------------|-------------|------------------|--------------------|--------------------------------------------------------------------------------------------------------------------------------------------------------------------------------------------------------------------------------------|-------------|------------------|--------------------|
| <i>AHRR</i>      | Nitrogen dioxide exposure                         | 4.90E-09    | –                | 29410382           | Maternal overweight/obesity                                                                                                                                                                                                          | 3.90E-10    | –                | 29016858           |
| <i>DPEP1</i>     | Nitrogen dioxide exposure                         | 4.90E-09    | –                | 29410382           | Maternal overweight/obesity, Triglycerides to total lipids ratio in IDL, Triglycerides to total lipids ratio in small LDL, Triglycerides to total lipids ratio in small VLDL, Triglycerides to total lipids ratio in very small VLDL | 7.60E-10    | –                | 29016858           |
| <i>KANK3</i>     | Nitrogen dioxide exposure                         | 4.90E-09    | –                | 29410382           | Maternal overweight/obesity                                                                                                                                                                                                          | 6.00E-09    | –                | 29016858           |
| <i>HLA-DPB1</i>  | Nitrogen dioxide exposure                         | 4.90E-09    | –                | 29410382           | Maternal overweight/obesity                                                                                                                                                                                                          | 2.10E-08    | –                | 29016858           |
| <i>LOC285419</i> | Nitrogen dioxide exposure                         | 4.90E-09    | –                | 29410382           | Maternal overweight/obesity, Triglycerides in medium HDL                                                                                                                                                                             | 3.20E-08    | –                | 29016858           |
| <i>COL27A1</i>   | Nitrogen dioxide exposure                         | 4.90E-09    | –                | 29410382           | Maternal overweight/obesity                                                                                                                                                                                                          | 4.20E-08    | –                | 29016858           |
| <i>EGFR</i>      | Nitrogen dioxide exposure                         | 5.00E-09    | –                | 29410382           | Maternal overweight/obesity                                                                                                                                                                                                          | 5.20E-11    | –                | 29016858           |
| <i>TERT</i>      | Air pollution exposure, Nitrogen dioxide exposure | 5.00E-09    | –                | 26731791, 29410382 | Serum triglycerides, Maternal overweight/obesity                                                                                                                                                                                     | 1.30E-10    | –                | 28173150, 29016858 |
| <i>LRRC61</i>    | Nitrogen dioxide exposure                         | 5.00E-09    | –                | 29410382           | Maternal overweight/obesity                                                                                                                                                                                                          | 1.80E-10    | –                | 29016858           |

| <b>Gene</b>    | <b>Trait1</b>                                     | <b>minP</b> | <b>Direction</b> | <b>PMID</b>        | <b>Trait2</b>                                | <b>minP</b> | <b>Direction</b> | <b>PMID</b>        |
|----------------|---------------------------------------------------|-------------|------------------|--------------------|----------------------------------------------|-------------|------------------|--------------------|
| <i>SORCS2</i>  | Nitrogen dioxide exposure                         | 5.00E-09    | –                | 29410382           | Maternal overweight/obesity, fasting glucose | 2.20E-10    | –                | 29016858, 31197173 |
| <i>HECW1</i>   | Nitrogen dioxide exposure                         | 5.00E-09    | –                | 29410382           | Maternal overweight/obesity                  | 3.40E-09    | –                | 29016858           |
| <i>RGS3</i>    | Nitrogen dioxide exposure                         | 5.00E-09    | –                | 29410382           | Maternal overweight/obesity, fasting glucose | 3.70E-09    | –                | 29016858, 31197173 |
| <i>FAM46B</i>  | Air pollution exposure, Nitrogen dioxide exposure | 5.00E-09    | –                | 26731791, 29410382 | Maternal overweight/obesity                  | 2.00E-08    | –                | 29016858           |
| <i>KCNN3</i>   | Nitrogen dioxide exposure                         | 5.10E-09    | –                | 29410382           | Maternal overweight/obesity                  | 7.40E-12    | –                | 29016858           |
| <i>IL1F6</i>   | Nitrogen dioxide exposure                         | 5.10E-09    | –                | 29410382           | Maternal overweight/obesity                  | 3.70E-10    | –                | 29016858           |
| <i>CACNA1D</i> | Nitrogen dioxide exposure                         | 5.10E-09    | –                | 29410382           | Maternal overweight/obesity                  | 6.80E-10    | –                | 29016858           |
| <i>SERGEF</i>  | Nitrogen dioxide exposure                         | 5.10E-09    | –                | 29410382           | Maternal overweight/obesity, Triglycerides   | 1.40E-09    | –                | 29016858, 31910897 |
| <i>GLIS1</i>   | Air pollution exposure, Nitrogen dioxide exposure | 5.10E-09    | –                | 26731791, 29410382 | Maternal overweight/obesity                  | 1.60E-09    | –                | 29016858           |
| <i>FA2H</i>    | Nitrogen dioxide exposure                         | 5.10E-09    | –                | 29410382           | Maternal overweight/obesity                  | 3.50E-09    | –                | 29016858           |
| <i>BICC1</i>   | Nitrogen dioxide exposure                         | 5.10E-09    | –                | 29410382           | Maternal overweight/obesity, 1-hour glucose  | 1.00E-08    | –                | 29016858, 33151971 |
| <i>CNR1</i>    | Nitrogen dioxide exposure                         | 5.10E-09    | –                | 29410382           | Maternal overweight/obesity                  | 1.60E-08    | –                | 29016858           |
| <i>C5orf47</i> | Nitrogen dioxide exposure                         | 5.10E-09    | –                | 29410382           | Maternal overweight/obesity                  | 1.70E-08    | –                | 29016858           |

| <b>Gene</b>               | <b>Trait1</b>                                     | <b>minP</b> | <b>Direction</b> | <b>PMID</b>        | <b>Trait2</b>                                        | <b>minP</b> | <b>Direction</b> | <b>PMID</b>        |
|---------------------------|---------------------------------------------------|-------------|------------------|--------------------|------------------------------------------------------|-------------|------------------|--------------------|
| <i>ALDH7A1</i>            | Nitrogen dioxide exposure                         | 5.10E-09    | -                | 29410382           | Maternal overweight/obesity                          | 2.20E-08    | -                | 29016858           |
| <i>SIPA1L3</i>            | Nitrogen dioxide exposure                         | 5.20E-09    | -                | 29410382           | Maternal overweight/obesity                          | 1.50E-09    | -                | 29016858           |
| <i>KRT3</i>               | Nitrogen dioxide exposure                         | 5.20E-09    | -                | 29410382           | Maternal overweight/obesity                          | 3.70E-08    | -                | 29016858           |
| <i>DISC1;TSNA X-DISC1</i> | Nitrogen dioxide exposure                         | 5.30E-09    | -                | 29410382           | Maternal overweight/obesity                          | 4.30E-09    | -                | 29016858           |
| <i>SGPL1</i>              | Air pollution exposure, Nitrogen dioxide exposure | 5.30E-09    | -                | 26731791, 29410382 | Maternal overweight/obesity                          | 1.10E-08    | -                | 29016858           |
| <i>KRTAP17-1</i>          | Nitrogen dioxide exposure                         | 5.30E-09    | -                | 29410382           | Maternal overweight/obesity                          | 2.30E-08    | -                | 29016858           |
| <i>LDLRAP1</i>            | Nitrogen dioxide exposure                         | 5.30E-09    | +                | 29410382           | fasting glucose, 1-hour glucose                      | 4.30E-08    | +                | 31197173, 33151971 |
| <i>MYH10</i>              | Nitrogen dioxide exposure                         | 5.40E-09    | -                | 29410382           | Maternal overweight/obesity                          | 9.80E-10    | -                | 29016858           |
| <i>WNT4</i>               | Nitrogen dioxide exposure                         | 5.40E-09    | -                | 29410382           | Maternal overweight/obesity                          | 1.30E-09    | -                | 29016858           |
| <i>KIAA1530</i>           | Air pollution exposure, Nitrogen dioxide exposure | 5.40E-09    | -                | 26731791, 29410382 | Maternal overweight/obesity, Obesity, Glucose        | 6.30E-09    | -                | 29016858, 32788176 |
| <i>EGFL8</i>              | Nitrogen dioxide exposure                         | 5.50E-09    | -                | 29410382           | Maternal overweight/obesity                          | 8.80E-10    | -                | 29016858           |
| <i>TBXAS1</i>             | Nitrogen dioxide exposure                         | 5.50E-09    | -                | 29410382           | Maternal overweight/obesity, Systolic blood pressure | 2.00E-09    | -                | 29016858           |
| <i>COL13A1</i>            | Air pollution exposure, Nitrogen dioxide exposure | 5.50E-09    | -                | 26731791, 29410382 | Maternal overweight/obesity                          | 4.10E-08    | -                | 29016858           |

| <b>Gene</b>     | <b>Trait1</b>                                     | <b>minP</b> | <b>Direction</b> | <b>PMID</b>        | <b>Trait2</b>                                                         | <b>minP</b> | <b>Direction</b> | <b>PMID</b>                  |
|-----------------|---------------------------------------------------|-------------|------------------|--------------------|-----------------------------------------------------------------------|-------------|------------------|------------------------------|
| <i>SUFU</i>     | Nitrogen dioxide exposure                         | 5.60E-09    | –                | 29410382           | Maternal overweight/obesity                                           | 6.90E-09    | –                | 29016858                     |
| <i>ADAM2</i>    | Nitrogen dioxide exposure                         | 5.60E-09    | –                | 29410382           | Maternal overweight/obesity                                           | 1.10E-08    | –                | 29016858                     |
| <i>PNLIPRP1</i> | Nitrogen dioxide exposure                         | 5.60E-09    | –                | 29410382           | Maternal overweight/obesity                                           | 1.20E-08    | –                | 29016858                     |
| <i>GEFT</i>     | Air pollution exposure, Nitrogen dioxide exposure | 5.60E-09    | –                | 26731791, 29410382 | Maternal overweight/obesity                                           | 1.40E-08    | –                | 29016858                     |
| <i>ASAP2</i>    | Air pollution exposure, Nitrogen dioxide exposure | 5.60E-09    | –                | 26731791, 29410382 | Maternal overweight/obesity, Triglycerides in very large HDL          | 4.00E-08    | –                | 29016858, 32916427           |
| <i>ME3</i>      | Nitrogen dioxide exposure                         | 5.60E-09    | –                | 29410382           | Maternal overweight/obesity, fasting glucose                          | 4.00E-08    | –                | 29016858, 31197173           |
| <i>PBX1</i>     | Nitrogen dioxide exposure                         | 5.60E-09    | –                | 29410382           | Maternal overweight/obesity, 1-hour glucose, Diastolic blood pressure | 4.80E-08    | –                | 29016858, 33151971           |
| <i>MYO5C</i>    | Nitrogen dioxide exposure                         | 5.70E-09    | –                | 29410382           | Maternal overweight/obesity, 1-hour glucose                           | 3.00E-10    | –                | 29016858, 33151971           |
| <i>FBXW11</i>   | Nitrogen dioxide exposure                         | 5.70E-09    | –                | 29410382           | Maternal overweight/obesity, fasting glucose, 1-hour glucose          | 1.90E-09    | –                | 29016858, 31197173, 33151971 |

| <b>Gene</b>      | <b>Trait1</b>                                     | <b>minP</b> | <b>Direction</b> | <b>PMID</b>        | <b>Trait2</b>                                                                  | <b>minP</b> | <b>Direction</b> | <b>PMID</b>        |
|------------------|---------------------------------------------------|-------------|------------------|--------------------|--------------------------------------------------------------------------------|-------------|------------------|--------------------|
| <i>GNAS</i>      | Nitrogen dioxide exposure                         | 5.70E-09    | +                | 29410382           | Maternal overweight/obesity, Triglycerides to total lipids ratio in large VLDL | 2.20E-09    | –                | 29016858           |
| <i>DNMT3L</i>    | Nitrogen dioxide exposure                         | 5.70E-09    | –                | 29410382           | Maternal overweight/obesity                                                    | 2.60E-09    | –                | 29016858           |
| <i>BAT5</i>      | Nitrogen dioxide exposure                         | 5.70E-09    | –                | 29410382           | Maternal overweight/obesity, 1-hour glucose                                    | 1.40E-08    | –                | 29016858, 33151971 |
| <i>HSPB7</i>     | Nitrogen dioxide exposure                         | 5.80E-09    | –                | 29410382           | Maternal overweight/obesity                                                    | 5.80E-09    | –                | 29016858           |
| <i>PLEKHA7</i>   | Nitrogen dioxide exposure                         | 5.80E-09    | –                | 29410382           | Maternal overweight/obesity                                                    | 4.50E-08    | –                | 29016858           |
| <i>MCC</i>       | Nitrogen dioxide exposure                         | 5.90E-09    | –                | 29410382           | Maternal overweight/obesity, 1-hour glucose                                    | 1.20E-10    | –                | 29016858, 33151971 |
| <i>ZBTB20</i>    | Nitrogen dioxide exposure                         | 5.90E-09    | –                | 29410382           | Maternal overweight/obesity                                                    | 1.70E-10    | –                | 29016858           |
| <i>C6orf222</i>  | Nitrogen dioxide exposure                         | 5.90E-09    | –                | 29410382           | Maternal overweight/obesity                                                    | 3.10E-10    | –                | 29016858           |
| <i>C20orf197</i> | Nitrogen dioxide exposure                         | 5.90E-09    | +                | 29410382           | Maternal overweight/obesity                                                    | 3.80E-10    | –                | 29016858           |
| <i>SPIRE2</i>    | Nitrogen dioxide exposure                         | 5.90E-09    | –                | 29410382           | Maternal overweight/obesity                                                    | 4.00E-09    | –                | 29016858           |
| <i>EFNA2</i>     | Air pollution exposure, Nitrogen dioxide exposure | 5.90E-09    | –                | 26731791, 29410382 | Maternal overweight/obesity                                                    | 2.40E-08    | –                | 29016858           |
| <i>KCNT1</i>     | Nitrogen dioxide exposure                         | 6.00E-09    | –                | 29410382           | Maternal overweight/obesity                                                    | 8.40E-11    | –                | 29016858           |

| <b>Gene</b>     | <b>Trait1</b>                                               | <b>minP</b> | <b>Direction</b> | <b>PMID</b>        | <b>Trait2</b>                                                                 | <b>minP</b> | <b>Direction</b> | <b>PMID</b>        |
|-----------------|-------------------------------------------------------------|-------------|------------------|--------------------|-------------------------------------------------------------------------------|-------------|------------------|--------------------|
| <i>ATXN7L1</i>  | Nitrogen dioxide exposure                                   | 6.00E-09    | –                | 29410382           | Maternal overweight/obesity, 1-hour glucose                                   | 1.30E-09    | –                | 29016858, 33151971 |
| <i>SLC22A12</i> | Nitrogen dioxide exposure                                   | 6.00E-09    | –                | 29410382           | Maternal overweight/obesity                                                   | 3.10E-08    | –                | 29016858           |
| <i>TFF3</i>     | Nitrogen dioxide exposure                                   | 6.10E-09    | –                | 29410382           | Maternal overweight/obesity                                                   | 2.20E-10    | –                | 29016858           |
| <i>XDH</i>      | Nitrogen dioxide exposure                                   | 6.10E-09    | –                | 29410382           | Maternal overweight/obesity                                                   | 7.60E-09    | –                | 29016858           |
| <i>CSF1R</i>    | Nitrogen dioxide exposure                                   | 6.10E-09    | –                | 29410382           | Maternal overweight/obesity                                                   | 2.00E-08    | –                | 29016858           |
| <i>SLC38A3</i>  | Nitrogen dioxide exposure                                   | 6.10E-09    | –                | 29410382           | Maternal overweight/obesity, Triglycerides to total lipids ratio in large HDL | 2.70E-08    | –                | 29016858           |
| <i>DGKI</i>     | Nitrogen dioxide exposure                                   | 6.20E-09    | –                | 29410382           | Maternal overweight/obesity                                                   | 1.10E-09    | –                | 29016858           |
| <i>AGRP</i>     | Nitrogen dioxide exposure, Particulate matter air pollution | 6.20E-09    | –                | 29410382, 32484729 | Maternal overweight/obesity                                                   | 1.90E-08    | –                | 29016858           |
| <i>TSPAN18</i>  | Nitrogen dioxide exposure                                   | 6.30E-09    | –                | 29410382           | Maternal overweight/obesity                                                   | 2.00E-09    | –                | 29016858, 32916427 |
| <i>CCDC73</i>   | Nitrogen dioxide exposure                                   | 6.30E-09    | –                | 29410382           | Maternal overweight/obesity                                                   | 1.50E-08    | –                | 29016858           |
| <i>TINAGL1</i>  | Nitrogen dioxide exposure                                   | 6.30E-09    | –                | 29410382           | Maternal overweight/obesity                                                   | 3.30E-08    | –                | 29016858           |
| <i>PVT1</i>     | Air pollution exposure, Nitrogen dioxide exposure           | 6.30E-09    | –                | 26731791, 29410382 | Maternal overweight/obesity                                                   | 4.70E-08    | –                | 29016858           |



| <b>Gene</b>            | <b>Trait1</b>                                     | <b>minP</b> | <b>Direction</b> | <b>PMID</b>        | <b>Trait2</b>               | <b>minP</b> | <b>Direction</b> | <b>PMID</b> |
|------------------------|---------------------------------------------------|-------------|------------------|--------------------|-----------------------------|-------------|------------------|-------------|
| <i>IGSF21</i>          | Nitrogen dioxide exposure                         | 6.40E-09    | -                | 29410382           | Maternal overweight/obesity | 1.30E-09    | -                | 29016858    |
| <i>RUNX1T1</i>         | Nitrogen dioxide exposure                         | 6.40E-09    | -                | 29410382           | Maternal overweight/obesity | 5.80E-09    | -                | 29016858    |
| <i>GRIK5</i>           | Nitrogen dioxide exposure                         | 6.40E-09    | -                | 29410382           | Maternal overweight/obesity | 5.90E-09    | -                | 29016858    |
| <i>SCN11A</i>          | Nitrogen dioxide exposure                         | 6.40E-09    | -                | 29410382           | Maternal overweight/obesity | 7.50E-09    | -                | 29016858    |
| <i>TRIB3</i>           | Nitrogen dioxide exposure                         | 6.40E-09    | -                | 29410382           | Maternal overweight/obesity | 1.60E-08    | -                | 29016858    |
| <i>KEL</i>             | Nitrogen dioxide exposure                         | 6.40E-09    | -                | 29410382           | Maternal overweight/obesity | 1.60E-08    | -                | 29016858    |
| <i>ACTRT2</i>          | Air pollution exposure, Nitrogen dioxide exposure | 6.40E-09    | -                | 26731791, 29410382 | Maternal overweight/obesity | 1.70E-08    | -                | 29016858    |
| <i>CYP26B1</i>         | Air pollution exposure, Nitrogen dioxide exposure | 6.50E-09    | -                | 26731791, 29410382 | Maternal overweight/obesity | 4.80E-10    | -                | 29016858    |
| <i>SH2D4B</i>          | Air pollution exposure, Nitrogen dioxide exposure | 6.50E-09    | -                | 26731791, 29410382 | Maternal overweight/obesity | 5.90E-09    | -                | 29016858    |
| <i>C1orf200;PIK3CD</i> | Nitrogen dioxide exposure                         | 6.50E-09    | +                | 29410382           | Maternal overweight/obesity | 1.40E-08    | +                | 29016858    |
| <i>TNNT3</i>           | Nitrogen dioxide exposure                         | 6.50E-09    | -                | 29410382           | Maternal overweight/obesity | 3.80E-08    | -                | 29016858    |
| <i>OR6V1</i>           | Nitrogen dioxide exposure                         | 6.60E-09    | -                | 29410382           | Maternal overweight/obesity | 6.60E-10    | -                | 29016858    |
| <i>METTL11B</i>        | Nitrogen dioxide exposure                         | 6.60E-09    | -                | 29410382           | Maternal overweight/obesity | 1.20E-09    | -                | 29016858    |

| <b>Gene</b>    | <b>Trait1</b>                                                                       | <b>minP</b> | <b>Direction</b> | <b>PMID</b>                  | <b>Trait2</b>                                                                                                                             | <b>minP</b> | <b>Direction</b> | <b>PMID</b>        |
|----------------|-------------------------------------------------------------------------------------|-------------|------------------|------------------------------|-------------------------------------------------------------------------------------------------------------------------------------------|-------------|------------------|--------------------|
| <i>ATP11A</i>  | Air pollution exposure, Nitrogen dioxide exposure                                   | 6.60E-09    | –                | 26731791, 29410382           | Maternal overweight/obesity, 1-hour glucose, Triglycerides in medium LDL, Triglycerides to total lipids ratio in very large VLDL          | 2.20E-08    | –                | 29016858, 33151971 |
| <i>SLCO2A1</i> | Nitrogen dioxide exposure                                                           | 6.60E-09    | –                | 29410382                     | Maternal overweight/obesity                                                                                                               | 3.10E-08    | –                | 29016858           |
| <i>DENND3</i>  | Air pollution exposure, Nitrogen dioxide exposure                                   | 6.70E-09    | –                | 26731791, 29410382           | Maternal overweight/obesity, Diastolic blood pressure, Triglycerides in large HDL, Triglycerides to total lipids ratio in very large VLDL | 5.00E-10    | –                | 29016858           |
| <i>RGL1</i>    | Nitrogen dioxide exposure                                                           | 6.70E-09    | –                | 29410382                     | Maternal overweight/obesity                                                                                                               | 1.70E-09    | –                | 29016858           |
| <i>PRKCZ</i>   | Air pollution exposure, Nitrogen dioxide exposure, Particulate matter air pollution | 6.70E-09    | –                | 26731791, 29410382, 32484729 | Maternal overweight/obesity, fasting glucose                                                                                              | 4.10E-09    | –                | 29016858, 31197173 |
| <i>MLC1</i>    | Nitrogen dioxide exposure                                                           | 6.70E-09    | –                | 29410382                     | Maternal overweight/obesity                                                                                                               | 2.30E-08    | –                | 29016858           |
| <i>LRRK1</i>   | Nitrogen dioxide exposure                                                           | 6.80E-09    | –                | 29410382                     | Maternal overweight/obesity                                                                                                               | 4.60E-10    | –                | 29016858           |
| <i>RUNDC2A</i> | Nitrogen dioxide exposure                                                           | 6.80E-09    | –                | 29410382                     | Maternal overweight/obesity                                                                                                               | 1.40E-08    | –                | 29016858           |

| <b>Gene</b>     | <b>Trait1</b>                                     | <b>minP</b> | <b>Direction</b> | <b>PMID</b>        | <b>Trait2</b>                                                                                                                                                             | <b>minP</b> | <b>Direction</b> | <b>PMID</b>        |
|-----------------|---------------------------------------------------|-------------|------------------|--------------------|---------------------------------------------------------------------------------------------------------------------------------------------------------------------------|-------------|------------------|--------------------|
| <i>KIAA1199</i> | Air pollution exposure, Nitrogen dioxide exposure | 6.90E-09    | -                | 26731791, 29410382 | Maternal overweight/obesity, Triglycerides in very large VLDL                                                                                                             | 7.00E-11    | -                | 29016858           |
| <i>NAA16</i>    | Nitrogen dioxide exposure                         | 7.00E-09    | +                | 29410382           | Maternal overweight/obesity                                                                                                                                               | 4.50E-10    | +                | 29016858           |
| <i>GOLGA3</i>   | Nitrogen dioxide exposure                         | 7.00E-09    | +                | 29410382           | Maternal overweight/obesity                                                                                                                                               | 1.20E-09    | +                | 29016858           |
| <i>AFAP1L2</i>  | Nitrogen dioxide exposure                         | 7.00E-09    | -                | 29410382           | Maternal overweight/obesity                                                                                                                                               | 1.70E-09    | -                | 29016858           |
| <i>PLEKHG5</i>  | Nitrogen dioxide exposure                         | 7.00E-09    | -                | 29410382           | Maternal overweight/obesity                                                                                                                                               | 2.00E-09    | -                | 29016858, 32916427 |
| <i>DNAI2</i>    | Nitrogen dioxide exposure                         | 7.00E-09    | -                | 29410382           | Maternal overweight/obesity                                                                                                                                               | 1.80E-08    | -                | 29016858           |
| <i>B3GAT1</i>   | Nitrogen dioxide exposure                         | 7.00E-09    | -                | 29410382           | Maternal overweight/obesity, fasting glucose                                                                                                                              | 2.00E-08    | -                | 29016858, 31197173 |
| <i>EHD1</i>     | Air pollution exposure, Nitrogen dioxide exposure | 7.10E-09    | +                | 26731791, 29410382 | Maternal overweight/obesity, Triglycerides in small HDL, Triglycerides in small VLDL, Triglycerides in very small VLDL, Triglycerides to total lipids ratio in medium HDL | 1.90E-10    | +                | 29016858           |
| <i>HABP2</i>    | Nitrogen dioxide exposure                         | 7.10E-09    | -                | 29410382           | Maternal overweight/obesity                                                                                                                                               | 2.60E-09    | -                | 29016858           |
| <i>UMODL1</i>   | Nitrogen dioxide exposure                         | 7.20E-09    | -                | 29410382           | Maternal overweight/obesity                                                                                                                                               | 2.30E-10    | -                | 29016858           |

| <b>Gene</b>          | <b>Trait1</b>                                     | <b>minP</b> | <b>Direction</b> | <b>PMID</b>        | <b>Trait2</b>               | <b>minP</b> | <b>Direction</b> | <b>PMID</b> |
|----------------------|---------------------------------------------------|-------------|------------------|--------------------|-----------------------------|-------------|------------------|-------------|
| <i>MEGF6;MIR551A</i> | Nitrogen dioxide exposure                         | 7.20E-09    | –                | 29410382           | Maternal overweight/obesity | 2.90E-09    | –                | 29016858    |
| <i>CD59</i>          | Nitrogen dioxide exposure                         | 7.20E-09    | –                | 29410382           | Maternal overweight/obesity | 8.60E-09    | –                | 29016858    |
| <i>BDKRB1</i>        | Nitrogen dioxide exposure                         | 7.30E-09    | –                | 29410382           | Maternal overweight/obesity | 9.20E-10    | –                | 29016858    |
| <i>COL11A1</i>       | Nitrogen dioxide exposure                         | 7.30E-09    | –                | 29410382           | Maternal overweight/obesity | 1.40E-09    | –                | 29016858    |
| <i>MYO16</i>         | Nitrogen dioxide exposure                         | 7.30E-09    | –                | 29410382           | Maternal overweight/obesity | 1.40E-09    | –                | 29016858    |
| <i>CACNA1E</i>       | Nitrogen dioxide exposure                         | 7.30E-09    | –                | 29410382           | Maternal overweight/obesity | 1.50E-08    | –                | 29016858    |
| <i>CNTN2</i>         | Nitrogen dioxide exposure                         | 7.30E-09    | –                | 29410382           | Maternal overweight/obesity | 2.30E-08    | –                | 29016858    |
| <i>FAM69A</i>        | Nitrogen dioxide exposure                         | 7.40E-09    | –                | 29410382           | Maternal overweight/obesity | 4.50E-10    | –                | 29016858    |
| <i>NPHP4</i>         | Air pollution exposure, Nitrogen dioxide exposure | 7.40E-09    | –                | 26731791, 29410382 | Maternal overweight/obesity | 1.10E-08    | –                | 29016858    |
| <i>PACRG</i>         | Nitrogen dioxide exposure                         | 7.40E-09    | –                | 29410382           | Maternal overweight/obesity | 3.00E-08    | –                | 29016858    |
| <i>MARCH10</i>       | Nitrogen dioxide exposure                         | 7.40E-09    | –                | 29410382           | Maternal overweight/obesity | 3.50E-08    | –                | 29016858    |
| <i>FGD6</i>          | Nitrogen dioxide exposure                         | 7.50E-09    | –                | 29410382           | Maternal overweight/obesity | 2.50E-08    | –                | 29016858    |
| <i>TPD52L1</i>       | Nitrogen dioxide exposure                         | 7.60E-09    | –                | 29410382           | Maternal overweight/obesity | 2.10E-09    | –                | 29016858    |
| <i>SLC23A3</i>       | Nitrogen dioxide exposure                         | 7.60E-09    | –                | 29410382           | Maternal overweight/obesity | 3.40E-09    | –                | 29016858    |
| <i>CCDC142</i>       | Nitrogen dioxide exposure                         | 7.60E-09    | –                | 29410382           | Maternal overweight/obesity | 7.30E-09    | –                | 29016858    |

| <b>Gene</b>    | <b>Trait1</b>                                     | <b>minP</b> | <b>Direction</b> | <b>PMID</b>        | <b>Trait2</b>                                                                                                    | <b>minP</b> | <b>Direction</b> | <b>PMID</b>        |
|----------------|---------------------------------------------------|-------------|------------------|--------------------|------------------------------------------------------------------------------------------------------------------|-------------|------------------|--------------------|
| <i>UCHL1</i>   | Nitrogen dioxide exposure                         | 7.60E-09    | –                | 29410382           | Maternal overweight/obesity                                                                                      | 1.00E-08    | –                | 29016858           |
| <i>AADAC</i>   | Nitrogen dioxide exposure                         | 7.60E-09    | –                | 29410382           | Maternal overweight/obesity                                                                                      | 3.60E-08    | –                | 29016858           |
| <i>EDN2</i>    | Nitrogen dioxide exposure                         | 7.70E-09    | –                | 29410382           | Maternal overweight/obesity                                                                                      | 2.10E-10    | –                | 29016858           |
| <i>B3GNTL1</i> | Nitrogen dioxide exposure                         | 7.70E-09    | –                | 29410382           | Maternal overweight/obesity, Triglycerides in chylomicrons and extremely large VLDL, Triglycerides in large VLDL | 9.40E-09    | –                | 29016858           |
| <i>CRIM1</i>   | Nitrogen dioxide exposure                         | 7.80E-09    | –                | 29410382           | Maternal overweight/obesity                                                                                      | 8.90E-11    | –                | 29016858           |
| <i>PTPRG</i>   | Air pollution exposure, Nitrogen dioxide exposure | 7.80E-09    | –                | 26731791, 29410382 | Maternal overweight/obesity                                                                                      | 6.70E-09    | –                | 29016858           |
| <i>SCD5</i>    | Nitrogen dioxide exposure                         | 7.90E-09    | –                | 29410382           | Maternal overweight/obesity, Triglycerides to total lipids ratio in very small VLDL                              | 8.00E-12    | –                | 29016858           |
| <i>TLL2</i>    | Nitrogen dioxide exposure                         | 7.90E-09    | –                | 29410382           | Maternal overweight/obesity                                                                                      | 7.50E-09    | –                | 29016858           |
| <i>LPP</i>     | Nitrogen dioxide exposure                         | 8.00E-09    | –                | 29410382           | Maternal overweight/obesity                                                                                      | 4.90E-10    | –                | 29016858           |
| <i>PRUNE2</i>  | Nitrogen dioxide exposure                         | 8.00E-09    | –                | 29410382           | Maternal overweight/obesity                                                                                      | 2.30E-08    | –                | 29016858           |
| <i>ENAH</i>    | Nitrogen dioxide exposure                         | 8.00E-09    | –                | 29410382           | Maternal overweight/obesity, Triglycerides                                                                       | 2.60E-08    | –                | 29016858, 31910897 |

| <b>Gene</b>     | <b>Trait1</b>                                     | <b>minP</b> | <b>Direction</b> | <b>PMID</b>        | <b>Trait2</b>                                                                                                                                                                      | <b>minP</b> | <b>Direction</b> | <b>PMID</b> |
|-----------------|---------------------------------------------------|-------------|------------------|--------------------|------------------------------------------------------------------------------------------------------------------------------------------------------------------------------------|-------------|------------------|-------------|
| <i>TNNT2</i>    | Nitrogen dioxide exposure                         | 8.00E-09    | –                | 29410382           | Maternal overweight/obesity                                                                                                                                                        | 3.20E-08    | –                | 29016858    |
| <i>CYP11A1</i>  | Nitrogen dioxide exposure                         | 8.00E-09    | –                | 29410382           | Maternal overweight/obesity                                                                                                                                                        | 4.30E-08    | –                | 29016858    |
| <i>FAM20C</i>   | Nitrogen dioxide exposure                         | 8.10E-09    | –                | 29410382           | Maternal overweight/obesity                                                                                                                                                        | 5.20E-12    | –                | 29016858    |
| <i>PQLC2</i>    | Nitrogen dioxide exposure                         | 8.20E-09    | –                | 29410382           | Maternal overweight/obesity                                                                                                                                                        | 1.30E-11    | –                | 29016858    |
| <i>MAP3K10</i>  | Nitrogen dioxide exposure                         | 8.20E-09    | –                | 29410382           | Maternal overweight/obesity                                                                                                                                                        | 1.20E-08    | –                | 29016858    |
| <i>PROKR2</i>   | Nitrogen dioxide exposure                         | 8.20E-09    | –                | 29410382           | Maternal overweight/obesity, Triglycerides, Triglycerides in large VLDL                                                                                                            | 2.60E-08    | –                | 29016858    |
| <i>RGMA</i>     | Nitrogen dioxide exposure                         | 8.30E-09    | –                | 29410382           | Maternal overweight/obesity, Triglycerides to total lipids ratio in large LDL, Triglycerides to total lipids ratio in medium LDL, Triglycerides to total lipids ratio in small LDL | 9.60E-10    | –                | 29016858    |
| <i>EPOR</i>     | Nitrogen dioxide exposure                         | 8.30E-09    | –                | 29410382           | Maternal overweight/obesity                                                                                                                                                        | 2.10E-09    | –                | 29016858    |
| <i>VAC14</i>    | Air pollution exposure, Nitrogen dioxide exposure | 8.30E-09    | –                | 26731791, 29410382 | Maternal overweight/obesity                                                                                                                                                        | 4.40E-09    | –                | 29016858    |
| <i>C11orf66</i> | Nitrogen dioxide exposure                         | 8.30E-09    | –                | 29410382           | Maternal overweight/obesity                                                                                                                                                        | 6.00E-09    | –                | 29016858    |

| <b>Gene</b>           | <b>Trait1</b>             | <b>minP</b> | <b>Direction</b> | <b>PMID</b> | <b>Trait2</b>                                    | <b>minP</b> | <b>Direction</b> | <b>PMID</b>        |
|-----------------------|---------------------------|-------------|------------------|-------------|--------------------------------------------------|-------------|------------------|--------------------|
| <i>BCL9</i>           | Nitrogen dioxide exposure | 8.30E-09    | -                | 29410382    | 1-hour glucose                                   | 1.00E-08    | +                | 33151971           |
| <i>HCG26</i>          | Nitrogen dioxide exposure | 8.40E-09    | -                | 29410382    | Maternal overweight/obesity                      | 4.20E-08    | -                | 29016858           |
| <i>ZSWIM4</i>         | Nitrogen dioxide exposure | 8.50E-09    | -                | 29410382    | Maternal overweight/obesity                      | 1.00E-08    | -                | 29016858           |
| <i>KCNG4</i>          | Nitrogen dioxide exposure | 8.50E-09    | -                | 29410382    | Maternal overweight/obesity                      | 1.60E-08    | -                | 29016858           |
| <i>CHST11</i>         | Nitrogen dioxide exposure | 8.60E-09    | +                | 29410382    | Serum triglycerides, Maternal overweight/obesity | 3.60E-10    | +                | 28213390, 29016858 |
| <i>CMTM5</i>          | Nitrogen dioxide exposure | 8.60E-09    | -                | 29410382    | Maternal overweight/obesity                      | 2.00E-08    | -                | 29016858           |
| <i>MFN2</i>           | Nitrogen dioxide exposure | 8.60E-09    | -                | 29410382    | Maternal overweight/obesity                      | 3.60E-08    | -                | 29016858           |
| <i>TRNP1</i>          | Nitrogen dioxide exposure | 8.60E-09    | -                | 29410382    | Maternal overweight/obesity                      | 3.70E-08    | -                | 29016858           |
| <i>C10orf54;CDH23</i> | Nitrogen dioxide exposure | 8.70E-09    | +                | 29410382    | Maternal overweight/obesity                      | 1.90E-09    | +                | 29016858           |
| <i>SLC5A9</i>         | Nitrogen dioxide exposure | 8.70E-09    | -                | 29410382    | Maternal overweight/obesity                      | 7.10E-09    | -                | 29016858, 32916427 |
| <i>EXOC4</i>          | Nitrogen dioxide exposure | 8.70E-09    | -                | 29410382    | Maternal overweight/obesity                      | 1.70E-08    | -                | 29016858           |
| <i>KIAA1274</i>       | Nitrogen dioxide exposure | 8.70E-09    | -                | 29410382    | Maternal overweight/obesity, fasting glucose     | 2.90E-08    | -                | 29016858, 31197173 |
| <i>ARRDC5</i>         | Nitrogen dioxide exposure | 8.80E-09    | -                | 29410382    | Maternal overweight/obesity                      | 1.10E-08    | -                | 29016858           |
| <i>S100A16</i>        | Nitrogen dioxide exposure | 8.80E-09    | -                | 29410382    | Maternal overweight/obesity                      | 3.60E-08    | -                | 29016858           |

| <b>Gene</b>      | <b>Trait1</b>             | <b>minP</b> | <b>Direction</b> | <b>PMID</b> | <b>Trait2</b>                                                                   | <b>minP</b> | <b>Direction</b> | <b>PMID</b>        |
|------------------|---------------------------|-------------|------------------|-------------|---------------------------------------------------------------------------------|-------------|------------------|--------------------|
| <i>PITPNM1</i>   | Nitrogen dioxide exposure | 8.80E-09    | –                | 29410382    | Maternal overweight/obesity                                                     | 4.30E-08    | +                | 29016858           |
| <i>MUC2</i>      | Nitrogen dioxide exposure | 8.80E-09    | –                | 29410382    | Maternal overweight/obesity                                                     | 4.50E-08    | –                | 29016858           |
| <i>MBNL2</i>     | Nitrogen dioxide exposure | 8.90E-09    | –                | 29410382    | Maternal overweight/obesity                                                     | 2.10E-09    | –                | 29016858           |
| <i>LOC400752</i> | Nitrogen dioxide exposure | 8.90E-09    | –                | 29410382    | Maternal overweight/obesity                                                     | 2.60E-08    | –                | 29016858           |
| <i>INPP4B</i>    | Nitrogen dioxide exposure | 9.00E-09    | –                | 29410382    | Maternal overweight/obesity                                                     | 4.90E-09    | –                | 29016858           |
| <i>CAMK2A</i>    | Nitrogen dioxide exposure | 9.10E-09    | –                | 29410382    | Maternal overweight/obesity                                                     | 2.00E-08    | –                | 29016858           |
| <i>C20orf26</i>  | Nitrogen dioxide exposure | 9.20E-09    | –                | 29410382    | Maternal overweight/obesity                                                     | 1.30E-10    | –                | 29016858           |
| <i>GALNT9</i>    | Nitrogen dioxide exposure | 9.20E-09    | –                | 29410382    | Maternal overweight/obesity, Triglycerides to total lipids ratio in medium VLDL | 2.20E-10    | –                | 29016858           |
| <i>PPP2R2C</i>   | Nitrogen dioxide exposure | 9.20E-09    | –                | 29410382    | Maternal overweight/obesity, 2-hour glucose                                     | 6.70E-09    | –                | 29016858, 33151971 |
| <i>GRB7</i>      | Nitrogen dioxide exposure | 9.20E-09    | –                | 29410382    | Maternal overweight/obesity                                                     | 3.10E-08    | –                | 29016858           |
| <i>IL4I1</i>     | Nitrogen dioxide exposure | 9.20E-09    | –                | 29410382    | Maternal overweight/obesity                                                     | 3.60E-08    | –                | 29016858           |
| <i>DUOXA1</i>    | Nitrogen dioxide exposure | 9.30E-09    | –                | 29410382    | Maternal overweight/obesity                                                     | 1.40E-08    | –                | 29016858           |
| <i>LOC286135</i> | Nitrogen dioxide exposure | 9.40E-09    | –                | 29410382    | Maternal overweight/obesity                                                     | 4.50E-10    | –                | 29016858           |
| <i>CETN1</i>     | Nitrogen dioxide exposure | 9.40E-09    | –                | 29410382    | Maternal overweight/obesity                                                     | 1.00E-09    | –                | 29016858           |



| <b>Gene</b>    | <b>Trait1</b>                                     | <b>minP</b> | <b>Direction</b> | <b>PMID</b>        | <b>Trait2</b>                                                                                             | <b>minP</b> | <b>Direction</b> | <b>PMID</b>        |
|----------------|---------------------------------------------------|-------------|------------------|--------------------|-----------------------------------------------------------------------------------------------------------|-------------|------------------|--------------------|
| <i>PGLYRP2</i> | Nitrogen dioxide exposure                         | 9.40E-09    | –                | 29410382           | Maternal overweight/obesity                                                                               | 5.30E-09    | –                | 29016858           |
| <i>ACCN4</i>   | Air pollution exposure, Nitrogen dioxide exposure | 9.50E-09    | –                | 26731791, 29410382 | Maternal overweight/obesity                                                                               | 1.20E-10    | –                | 29016858           |
| <i>CCNL2</i>   | Nitrogen dioxide exposure                         | 9.50E-09    | –                | 29410382           | Maternal overweight/obesity                                                                               | 2.40E-09    | –                | 29016858           |
| <i>KCNH2</i>   | Nitrogen dioxide exposure                         | 9.60E-09    | –                | 29410382           | Maternal overweight/obesity                                                                               | 1.80E-12    | –                | 29016858           |
| <i>PHC2</i>    | Nitrogen dioxide exposure                         | 9.60E-09    | –                | 29410382           | Maternal overweight/obesity                                                                               | 1.10E-08    | –                | 29016858           |
| <i>MAML2</i>   | Nitrogen dioxide exposure                         | 9.60E-09    | –                | 29410382           | Maternal overweight/obesity, 1-hour glucose                                                               | 2.30E-08    | –                | 29016858, 33151971 |
| <i>KRT18</i>   | Nitrogen dioxide exposure                         | 9.60E-09    | –                | 29410382           | Maternal overweight/obesity                                                                               | 2.60E-08    | –                | 29016858           |
| <i>ST5</i>     | Air pollution exposure, Nitrogen dioxide exposure | 9.80E-09    | –                | 26731791, 29410382 | Maternal overweight/obesity, Triglycerides in small HDL, Triglycerides to total lipids ratio in small HDL | 4.30E-08    | –                | 29016858           |
| <i>PTCRA</i>   | Nitrogen dioxide exposure                         | 9.90E-09    | –                | 29410382           | Maternal overweight/obesity                                                                               | 2.90E-12    | –                | 29016858           |
| <i>ATP2A3</i>  | Nitrogen dioxide exposure                         | 9.90E-09    | –                | 29410382           | Maternal overweight/obesity                                                                               | 8.00E-11    | –                | 29016858           |
| <i>PXDN</i>    | Nitrogen dioxide exposure                         | 9.90E-09    | –                | 29410382           | Maternal overweight/obesity                                                                               | 1.40E-09    | –                | 29016858           |
| <i>ALDH8A1</i> | Air pollution exposure, Nitrogen dioxide exposure | 1.00E-08    | –                | 26731791, 29410382 | Maternal overweight/obesity                                                                               | 7.10E-09    | –                | 29016858           |

| <b>Gene</b>          | <b>Trait1</b>                                     | <b>minP</b> | <b>Direction</b> | <b>PMID</b>        | <b>Trait2</b>                                                                  | <b>minP</b> | <b>Direction</b> | <b>PMID</b>        |
|----------------------|---------------------------------------------------|-------------|------------------|--------------------|--------------------------------------------------------------------------------|-------------|------------------|--------------------|
| <i>AQP6</i>          | Nitrogen dioxide exposure                         | 1.00E-08    | –                | 29410382           | Maternal overweight/obesity                                                    | 9.40E-09    | –                | 29016858           |
| <i>RBM47</i>         | Air pollution exposure, Nitrogen dioxide exposure | 1.00E-08    | –                | 26731791, 29410382 | Maternal overweight/obesity                                                    | 2.60E-08    | –                | 29016858           |
| <i>HLA-DOA</i>       | Nitrogen dioxide exposure                         | 1.00E-08    | –                | 29410382           | Maternal overweight/obesity                                                    | 3.40E-08    | –                | 29016858           |
| <i>RAB11FIP4</i>     | Nitrogen dioxide exposure                         | 1.00E-08    | –                | 29410382           | Maternal overweight/obesity                                                    | 3.40E-08    | –                | 29016858           |
| <i>MTNR1B</i>        | Nitrogen dioxide exposure                         | 1.00E-08    | –                | 29410382           | Maternal overweight/obesity                                                    | 4.00E-08    | –                | 29016858           |
| <i>EPHB3</i>         | Nitrogen dioxide exposure                         | 1.10E-08    | –                | 29410382           | Maternal overweight/obesity                                                    | 2.20E-14    | –                | 29016858           |
| <i>DAO</i>           | Nitrogen dioxide exposure                         | 1.10E-08    | –                | 29410382           | Maternal overweight/obesity                                                    | 4.20E-11    | –                | 29016858           |
| <i>BRSK2</i>         | Nitrogen dioxide exposure                         | 1.10E-08    | –                | 29410382           | Maternal overweight/obesity                                                    | 7.50E-11    | –                | 29016858           |
| <i>FLII</i>          | Nitrogen dioxide exposure                         | 1.10E-08    | –                | 29410382           | Maternal overweight/obesity, Diastolic Blood Pressure, Systolic Blood Pressure | 6.20E-10    | –                | 29016858, 29198723 |
| <i>FLT4</i>          | Nitrogen dioxide exposure                         | 1.10E-08    | –                | 29410382           | Maternal overweight/obesity                                                    | 1.70E-09    | +                | 29016858           |
| <i>ABTB2</i>         | Nitrogen dioxide exposure                         | 1.10E-08    | –                | 29410382           | Maternal overweight/obesity                                                    | 1.90E-09    | –                | 29016858           |
| <i>FLRT1;MACROD1</i> | Nitrogen dioxide exposure                         | 1.10E-08    | –                | 29410382           | Maternal overweight/obesity                                                    | 2.40E-09    | –                | 29016858           |
| <i>RYR1</i>          | Nitrogen dioxide exposure                         | 1.10E-08    | –                | 29410382           | Maternal overweight/obesity, Triglycerides to total lipids ratio in large HDL  | 2.50E-09    | –                | 29016858           |

| <b>Gene</b>                                                                                                                                                                                                                                                                                                                                                             | <b>Trait1</b>                                     | <b>minP</b> | <b>Direction</b> | <b>PMID</b>           | <b>Trait2</b>               | <b>minP</b> | <b>Direction</b> | <b>PMID</b> |
|-------------------------------------------------------------------------------------------------------------------------------------------------------------------------------------------------------------------------------------------------------------------------------------------------------------------------------------------------------------------------|---------------------------------------------------|-------------|------------------|-----------------------|-----------------------------|-------------|------------------|-------------|
| <i>DARC</i>                                                                                                                                                                                                                                                                                                                                                             | Nitrogen dioxide exposure                         | 1.10E-08    | –                | 29410382              | Maternal overweight/obesity | 4.00E-09    | –                | 29016858    |
| <i>C11orf41</i>                                                                                                                                                                                                                                                                                                                                                         | Nitrogen dioxide exposure                         | 1.10E-08    | –                | 29410382              | Maternal overweight/obesity | 6.10E-09    | –                | 29016858    |
| <i>PCDHGA4;</i><br><i>PCDHGA11;</i><br><i>PCDHGA9;</i><br><i>PCDHGA1;</i><br><i>PCDHGB1;</i><br><i>PCDHGB8P;</i><br><i>PCDHGB6;</i><br><i>PCDHGB3;</i><br><i>PCDHGB7;</i><br><i>PCDHGA6;</i><br><i>PCDHGA8;</i><br><i>PCDHGA10;</i><br><i>PCDHGA5;</i><br><i>PCDHGB4;</i><br><i>PCDHGA3;</i><br><i>PCDHGA2;</i><br><i>PCDHGB2;</i><br><i>PCDHGA7;</i><br><i>PCDHGB5</i> | Nitrogen dioxide exposure                         | 1.10E-08    | –                | 29410382              | Maternal overweight/obesity | 9.80E-09    | –                | 29016858    |
| <i>HEXDC</i>                                                                                                                                                                                                                                                                                                                                                            | Air pollution exposure, Nitrogen dioxide exposure | 1.10E-08    | –                | 26731791,<br>29410382 | Maternal overweight/obesity | 1.30E-08    | –                | 29016858    |
| <i>ZNF862</i>                                                                                                                                                                                                                                                                                                                                                           | Nitrogen dioxide exposure                         | 1.10E-08    | –                | 29410382              | Maternal overweight/obesity | 1.30E-08    | –                | 29016858    |
| <i>PSCA</i>                                                                                                                                                                                                                                                                                                                                                             | Nitrogen dioxide exposure                         | 1.10E-08    | –                | 29410382              | Maternal overweight/obesity | 1.40E-08    | –                | 29016858    |

| <b>Gene</b>              | <b>Trait1</b>             | <b>minP</b> | <b>Direction</b> | <b>PMID</b> | <b>Trait2</b>                                                 | <b>minP</b> | <b>Direction</b> | <b>PMID</b>        |
|--------------------------|---------------------------|-------------|------------------|-------------|---------------------------------------------------------------|-------------|------------------|--------------------|
| <i>FAM108C1</i>          | Nitrogen dioxide exposure | 1.10E-08    | –                | 29410382    | Maternal overweight/obesity                                   | 1.40E-08    | –                | 29016858           |
| <i>OR4D10</i>            | Nitrogen dioxide exposure | 1.10E-08    | –                | 29410382    | Maternal overweight/obesity                                   | 1.80E-08    | –                | 29016858           |
| <i>SRGAP2</i>            | Nitrogen dioxide exposure | 1.10E-08    | –                | 29410382    | Maternal overweight/obesity                                   | 2.10E-08    | –                | 29016858           |
| <i>FAM135A</i>           | Nitrogen dioxide exposure | 1.10E-08    | –                | 29410382    | Maternal overweight/obesity                                   | 4.50E-08    | –                | 29016858           |
| <i>ATP8B1</i>            | Nitrogen dioxide exposure | 1.20E-08    | –                | 29410382    | Maternal overweight/obesity                                   | 5.80E-11    | –                | 29016858           |
| <i>ADCY3</i>             | Nitrogen dioxide exposure | 1.20E-08    | –                | 29410382    | Maternal overweight/obesity                                   | 7.10E-11    | –                | 29016858           |
| <i>LRRN2</i>             | Nitrogen dioxide exposure | 1.20E-08    | –                | 29410382    | Maternal overweight/obesity                                   | 1.60E-10    | –                | 29016858           |
| <i>CSF2</i>              | Nitrogen dioxide exposure | 1.20E-08    | –                | 29410382    | Maternal overweight/obesity, fasting glucose                  | 2.70E-10    | –                | 29016858, 31197173 |
| <i>C1orf203</i>          | Nitrogen dioxide exposure | 1.20E-08    | –                | 29410382    | Maternal overweight/obesity                                   | 3.30E-10    | –                | 29016858           |
| <i>CASZ1</i>             | Nitrogen dioxide exposure | 1.20E-08    | –                | 29410382    | Maternal overweight/obesity, Triglycerides in very small VLDL | 3.50E-10    | –                | 29016858           |
| <i>LOC642587; MIR205</i> | Nitrogen dioxide exposure | 1.20E-08    | –                | 29410382    | Maternal overweight/obesity                                   | 5.40E-10    | –                | 29016858           |
| <i>KIAA1609</i>          | Nitrogen dioxide exposure | 1.20E-08    | –                | 29410382    | Maternal overweight/obesity                                   | 7.60E-10    | –                | 29016858           |
| <i>MET</i>               | Nitrogen dioxide exposure | 1.20E-08    | –                | 29410382    | Maternal overweight/obesity                                   | 1.40E-09    | –                | 29016858           |
| <i>ZNF365</i>            | Nitrogen dioxide exposure | 1.20E-08    | –                | 29410382    | Maternal overweight/obesity                                   | 2.30E-09    | –                | 29016858           |

| <b>Gene</b>      | <b>Trait1</b>                                     | <b>minP</b> | <b>Direction</b> | <b>PMID</b>        | <b>Trait2</b>                                                                 | <b>minP</b> | <b>Direction</b> | <b>PMID</b> |
|------------------|---------------------------------------------------|-------------|------------------|--------------------|-------------------------------------------------------------------------------|-------------|------------------|-------------|
| <i>SLC39A4</i>   | Nitrogen dioxide exposure                         | 1.20E-08    | –                | 29410382           | Maternal overweight/obesity                                                   | 2.70E-09    | –                | 29016858    |
| <i>OR4D11</i>    | Nitrogen dioxide exposure                         | 1.20E-08    | –                | 29410382           | Maternal overweight/obesity                                                   | 3.60E-09    | –                | 29016858    |
| <i>A2BP1</i>     | Nitrogen dioxide exposure                         | 1.20E-08    | –                | 29410382           | Maternal overweight/obesity, Triglycerides to total lipids ratio in large LDL | 4.80E-09    | –                | 29016858    |
| <i>AKT1S1</i>    | Nitrogen dioxide exposure                         | 1.20E-08    | –                | 29410382           | Maternal overweight/obesity                                                   | 5.70E-09    | –                | 29016858    |
| <i>MGC26597</i>  | Nitrogen dioxide exposure                         | 1.20E-08    | –                | 29410382           | Maternal overweight/obesity                                                   | 6.20E-09    | –                | 29016858    |
| <i>BEGAIN</i>    | Nitrogen dioxide exposure                         | 1.20E-08    | –                | 29410382           | Maternal overweight/obesity                                                   | 9.80E-09    | –                | 29016858    |
| <i>OMP;CAPN5</i> | Nitrogen dioxide exposure                         | 1.20E-08    | –                | 29410382           | Maternal overweight/obesity                                                   | 1.30E-08    | –                | 29016858    |
| <i>COL5A1</i>    | Air pollution exposure, Nitrogen dioxide exposure | 1.20E-08    | –                | 26731791, 29410382 | Maternal overweight/obesity                                                   | 1.70E-08    | –                | 29016858    |
| <i>TMEM211</i>   | Nitrogen dioxide exposure                         | 1.20E-08    | –                | 29410382           | Maternal overweight/obesity                                                   | 3.10E-08    | –                | 29016858    |
| <i>GDNF</i>      | Nitrogen dioxide exposure                         | 1.20E-08    | –                | 29410382           | Maternal overweight/obesity                                                   | 3.40E-08    | –                | 29016858    |
| <i>RAD51L1</i>   | Nitrogen dioxide exposure                         | 1.30E-08    | –                | 29410382           | Maternal overweight/obesity                                                   | 1.60E-10    | –                | 29016858    |
| <i>TH</i>        | Nitrogen dioxide exposure                         | 1.30E-08    | –                | 29410382           | Maternal overweight/obesity                                                   | 1.80E-09    | –                | 29016858    |
| <i>SEMA5B</i>    | Nitrogen dioxide exposure                         | 1.30E-08    | –                | 29410382           | Maternal overweight/obesity                                                   | 2.30E-09    | –                | 29016858    |
| <i>C19orf21</i>  | Nitrogen dioxide exposure                         | 1.30E-08    | –                | 29410382           | Maternal overweight/obesity                                                   | 8.60E-09    | –                | 29016858    |

| <b>Gene</b>      | <b>Trait1</b>                                     | <b>minP</b> | <b>Direction</b> | <b>PMID</b>        | <b>Trait2</b>                                                                                   | <b>minP</b> | <b>Direction</b> | <b>PMID</b>                  |
|------------------|---------------------------------------------------|-------------|------------------|--------------------|-------------------------------------------------------------------------------------------------|-------------|------------------|------------------------------|
| <i>SLC29A4</i>   | Nitrogen dioxide exposure                         | 1.30E-08    | –                | 29410382           | Maternal overweight/obesity                                                                     | 8.90E-09    | –                | 29016858                     |
| <i>LIMCH1</i>    | Nitrogen dioxide exposure                         | 1.30E-08    | –                | 29410382           | Maternal overweight/obesity                                                                     | 1.30E-08    | –                | 29016858                     |
| <i>ADAM8</i>     | Nitrogen dioxide exposure                         | 1.30E-08    | –                | 29410382           | Maternal overweight/obesity, Diastolic Blood Pressure, Systolic Blood Pressure, fasting glucose | 1.50E-08    | –                | 29016858, 29198723, 31197173 |
| <i>ZNF385A</i>   | Nitrogen dioxide exposure                         | 1.30E-08    | –                | 29410382           | Maternal overweight/obesity                                                                     | 1.50E-08    | –                | 29016858                     |
| <i>SHF</i>       | Nitrogen dioxide exposure                         | 1.30E-08    | –                | 29410382           | Maternal overweight/obesity                                                                     | 2.20E-08    | –                | 29016858                     |
| <i>LOC407835</i> | Nitrogen dioxide exposure                         | 1.30E-08    | –                | 29410382           | Maternal overweight/obesity                                                                     | 2.30E-08    | –                | 29016858                     |
| <i>FXYD5</i>     | Nitrogen dioxide exposure                         | 1.40E-08    | –                | 29410382           | Maternal overweight/obesity                                                                     | 9.40E-12    | –                | 29016858                     |
| <i>CIQC</i>      | Nitrogen dioxide exposure                         | 1.40E-08    | –                | 29410382           | Maternal overweight/obesity                                                                     | 3.20E-10    | –                | 29016858                     |
| <i>SEMA3B</i>    | Air pollution exposure, Nitrogen dioxide exposure | 1.40E-08    | –                | 26731791, 29410382 | Maternal overweight/obesity, Triglycerides to total lipids ratio in very large VLDL             | 3.90E-10    | –                | 29016858                     |
| <i>ASAM</i>      | Nitrogen dioxide exposure                         | 1.40E-08    | –                | 29410382           | Maternal overweight/obesity                                                                     | 6.30E-10    | –                | 29016858                     |
| <i>PTMS</i>      | Nitrogen dioxide exposure                         | 1.40E-08    | –                | 29410382           | Maternal overweight/obesity                                                                     | 2.80E-09    | –                | 29016858                     |

| <b>Gene</b>    | <b>Trait1</b>                                                | <b>minP</b> | <b>Direction</b> | <b>PMID</b>        | <b>Trait2</b>                                                                                                                                                                                          | <b>minP</b> | <b>Direction</b> | <b>PMID</b>        |
|----------------|--------------------------------------------------------------|-------------|------------------|--------------------|--------------------------------------------------------------------------------------------------------------------------------------------------------------------------------------------------------|-------------|------------------|--------------------|
| <i>LRP5</i>    | Nitrogen dioxide exposure                                    | 1.40E-08    | -                | 29410382           | Maternal overweight/obesity, Triglycerides in HDL, Triglycerides to total lipids ratio in IDL, Triglycerides to total lipids ratio in large HDL, Triglycerides to total lipids ratio in very large HDL | 1.50E-08    | -                | 29016858           |
| <i>CAPZB</i>   | Nitrogen dioxide exposure, Particulate matter <2.5um (PM2.5) | 1.40E-08    | -                | 29410382           | Maternal overweight/obesity, 1-hour glucose                                                                                                                                                            | 1.80E-08    | -                | 29016858, 33151971 |
| <i>CNIH3</i>   | Air pollution exposure, Nitrogen dioxide exposure            | 1.40E-08    | -                | 26731791, 29410382 | Maternal overweight/obesity                                                                                                                                                                            | 1.90E-08    | -                | 29016858           |
| <i>UBASH3B</i> | Nitrogen dioxide exposure                                    | 1.40E-08    | -                | 29410382           | Maternal overweight/obesity                                                                                                                                                                            | 2.20E-08    | -                | 29016858           |
| <i>NCALD</i>   | Nitrogen dioxide exposure                                    | 1.40E-08    | -                | 29410382           | Maternal overweight/obesity                                                                                                                                                                            | 2.40E-08    | -                | 29016858           |
| <i>YAP1</i>    | Nitrogen dioxide exposure                                    | 1.40E-08    | -                | 29410382           | Maternal overweight/obesity                                                                                                                                                                            | 3.10E-08    | -                | 29016858           |
| <i>SEMA4F</i>  | Nitrogen dioxide exposure                                    | 1.40E-08    | -                | 29410382           | Maternal overweight/obesity                                                                                                                                                                            | 3.20E-08    | -                | 29016858           |
| <i>NOSIP</i>   | Nitrogen dioxide exposure                                    | 1.40E-08    | +                | 29410382           | Maternal overweight/obesity, Triglycerides in large HDL                                                                                                                                                | 3.40E-08    | +                | 29016858           |
| <i>TCF3</i>    | Air pollution exposure, Nitrogen dioxide exposure            | 1.40E-08    | -                | 26731791, 29410382 | Maternal overweight/obesity                                                                                                                                                                            | 4.10E-08    | -                | 29016858           |

| <b>Gene</b>                      | <b>Trait1</b>             | <b>minP</b> | <b>Direction</b> | <b>PMID</b> | <b>Trait2</b>                                                                                                                                                                                            | <b>minP</b> | <b>Direction</b> | <b>PMID</b>                            |
|----------------------------------|---------------------------|-------------|------------------|-------------|----------------------------------------------------------------------------------------------------------------------------------------------------------------------------------------------------------|-------------|------------------|----------------------------------------|
| <i>RBPMS</i>                     | Nitrogen dioxide exposure | 1.50E-08    | –                | 29410382    | Maternal obesity, Maternal overweight/obesity                                                                                                                                                            | 9.10E-12    | –                | 25855720, 29016858                     |
| <i>ANKRD11</i>                   | Nitrogen dioxide exposure | 1.50E-08    | –                | 29410382    | Maternal overweight/obesity, Diastolic Blood Pressure, Systolic Blood Pressure, fasting glucose, 1-hour glucose, Ratio of triglycerides to phosphoglycerides, Triglycerides, Triglycerides in large VLDL | 2.50E-10    | –                | 29016858, 29198723, 31197173, 33151971 |
| <i>GP1BA</i>                     | Nitrogen dioxide exposure | 1.50E-08    | –                | 29410382    | Maternal overweight/obesity                                                                                                                                                                              | 3.90E-10    | –                | 29016858                               |
| <i>B3GNT3</i>                    | Nitrogen dioxide exposure | 1.50E-08    | –                | 29410382    | Maternal overweight/obesity, 1-hour glucose                                                                                                                                                              | 2.40E-09    | –                | 29016858, 33151971                     |
| <i>TMEM86A</i>                   | Nitrogen dioxide exposure | 1.50E-08    | –                | 29410382    | Maternal overweight/obesity                                                                                                                                                                              | 3.60E-09    | –                | 29016858                               |
| <i>ZNF692</i>                    | Nitrogen dioxide exposure | 1.50E-08    | –                | 29410382    | Maternal overweight/obesity, Triglycerides in large HDL                                                                                                                                                  | 5.90E-09    | +                | 29016858                               |
| <i>FAM189A1</i>                  | Nitrogen dioxide exposure | 1.50E-08    | –                | 29410382    | Maternal overweight/obesity                                                                                                                                                                              | 8.40E-09    | –                | 29016858                               |
| <i>WFDC10B;</i><br><i>WFDC13</i> | Nitrogen dioxide exposure | 1.50E-08    | –                | 29410382    | Maternal overweight/obesity                                                                                                                                                                              | 1.00E-08    | –                | 29016858                               |



| <b>Gene</b>            | <b>Trait1</b>                                                            | <b>minP</b> | <b>Direction</b> | <b>PMID</b>                  | <b>Trait2</b>                                                                                                                                                                                          | <b>minP</b> | <b>Direction</b> | <b>PMID</b>        |
|------------------------|--------------------------------------------------------------------------|-------------|------------------|------------------------------|--------------------------------------------------------------------------------------------------------------------------------------------------------------------------------------------------------|-------------|------------------|--------------------|
| <i>RPTOR</i>           | Air pollution exposure, Prenatal NO2 exposure, Nitrogen dioxide exposure | 1.50E-08    | –                | 26731791, 27448387, 29410382 | Maternal overweight/obesity, 1-hour glucose, Triglycerides in IDL, Triglycerides in large LDL, Triglycerides to total lipids ratio in large HDL, Triglycerides to total lipids ratio in very large HDL | 2.30E-08    | –                | 29016858, 33151971 |
| <i>CPE;MIR197</i><br>9 | Nitrogen dioxide exposure                                                | 1.50E-08    | –                | 29410382                     | Maternal overweight/obesity                                                                                                                                                                            | 2.40E-08    | –                | 29016858           |
| <i>ARID3A</i>          | Nitrogen dioxide exposure                                                | 1.50E-08    | –                | 29410382                     | Maternal overweight/obesity, 1-hour glucose                                                                                                                                                            | 2.70E-08    | –                | 29016858, 33151971 |
| <i>EPHX1</i>           | Nitrogen dioxide exposure                                                | 1.50E-08    | –                | 29410382                     | Maternal overweight/obesity                                                                                                                                                                            | 2.90E-08    | –                | 29016858           |
| <i>KCNJ16</i>          | Nitrogen dioxide exposure                                                | 1.50E-08    | –                | 29410382                     | Maternal overweight/obesity                                                                                                                                                                            | 4.30E-08    | –                | 29016858           |
| <i>LRRC31</i>          | Nitrogen dioxide exposure                                                | 1.50E-08    | –                | 29410382                     | Maternal overweight/obesity                                                                                                                                                                            | 4.60E-08    | –                | 29016858           |
| <i>DDR1</i>            | Nitrogen dioxide exposure                                                | 1.60E-08    | –                | 29410382                     | Maternal overweight/obesity                                                                                                                                                                            | 1.50E-12    | –                | 29016858           |
| <i>ZMIZ1</i>           | Air pollution exposure, Nitrogen dioxide exposure                        | 1.60E-08    | –                | 26731791, 29410382           | Diastolic Blood Pressure, Systolic Blood Pressure, Triglycerides, Triglycerides in small HDL                                                                                                           | 2.00E-11    | –                | 29198723           |

| <b>Gene</b>           | <b>Trait1</b>             | <b>minP</b> | <b>Direction</b> | <b>PMID</b> | <b>Trait2</b>                                                                                                                           | <b>minP</b> | <b>Direction</b> | <b>PMID</b> |
|-----------------------|---------------------------|-------------|------------------|-------------|-----------------------------------------------------------------------------------------------------------------------------------------|-------------|------------------|-------------|
| <i>KIAA0146</i>       | Nitrogen dioxide exposure | 1.60E-08    | –                | 29410382    | Maternal overweight/obesity, Ratio of triglycerides to phosphoglycerides, Triglycerides in large VLDL, Triglycerides in very large VLDL | 4.40E-11    | –                | 29016858    |
| <i>FSCN1</i>          | Nitrogen dioxide exposure | 1.60E-08    | –                | 29410382    | Maternal overweight/obesity                                                                                                             | 5.10E-11    | –                | 29016858    |
| <i>C3orf52;MIR567</i> | Nitrogen dioxide exposure | 1.60E-08    | –                | 29410382    | Maternal overweight/obesity                                                                                                             | 1.70E-09    | –                | 29016858    |
| <i>SEPNI</i>          | Nitrogen dioxide exposure | 1.60E-08    | –                | 29410382    | Maternal overweight/obesity                                                                                                             | 1.70E-09    | –                | 29016858    |
| <i>SMOC2</i>          | Nitrogen dioxide exposure | 1.60E-08    | –                | 29410382    | Maternal overweight/obesity, Triglycerides in chylomicrons and extremely large VLDL                                                     | 4.00E-09    | –                | 29016858    |
| <i>MTMR11</i>         | Nitrogen dioxide exposure | 1.60E-08    | –                | 29410382    | Maternal overweight/obesity                                                                                                             | 5.10E-09    | –                | 29016858    |
| <i>PIK3CD</i>         | Nitrogen dioxide exposure | 1.60E-08    | –                | 29410382    | Maternal overweight/obesity, Triglycerides in small HDL                                                                                 | 1.10E-08    | –                | 29016858    |
| <i>DOCK2</i>          | Nitrogen dioxide exposure | 1.60E-08    | –                | 29410382    | Maternal overweight/obesity                                                                                                             | 1.40E-08    | –                | 29016858    |
| <i>WDR27</i>          | Nitrogen dioxide exposure | 1.60E-08    | –                | 29410382    | Maternal overweight/obesity                                                                                                             | 1.60E-08    | –                | 29016858    |
| <i>LFNG</i>           | Nitrogen dioxide exposure | 1.60E-08    | –                | 29410382    | Maternal overweight/obesity                                                                                                             | 3.20E-08    | –                | 29016858    |

| <b>Gene</b>   | <b>Trait1</b>             | <b>minP</b> | <b>Direction</b> | <b>PMID</b> | <b>Trait2</b>                                                                                                                                   | <b>minP</b> | <b>Direction</b> | <b>PMID</b>        |
|---------------|---------------------------|-------------|------------------|-------------|-------------------------------------------------------------------------------------------------------------------------------------------------|-------------|------------------|--------------------|
| <i>RNLS</i>   | Nitrogen dioxide exposure | 1.60E-08    | –                | 29410382    | Maternal overweight/obesity, Triglycerides, Ratio of triglycerides to phosphoglycerides, Triglycerides in chylomicrons and extremely large VLDL | 3.30E-08    | –                | 29016858, 31910897 |
| <i>KIF26B</i> | Nitrogen dioxide exposure | 1.60E-08    | –                | 29410382    | Maternal overweight/obesity, Triglycerides to total lipids ratio in medium HDL, Triglycerides to total lipids ratio in small HDL                | 3.80E-08    | –                | 29016858           |
| <i>CDH29</i>  | Nitrogen dioxide exposure | 1.70E-08    | –                | 29410382    | Maternal overweight/obesity                                                                                                                     | 3.50E-10    | –                | 29016858           |
| <i>HGFAC</i>  | Nitrogen dioxide exposure | 1.70E-08    | –                | 29410382    | Maternal overweight/obesity                                                                                                                     | 2.10E-09    | –                | 29016858           |
| <i>TNC</i>    | Nitrogen dioxide exposure | 1.70E-08    | –                | 29410382    | Maternal overweight/obesity                                                                                                                     | 5.40E-09    | –                | 29016858           |
| <i>TLN2</i>   | Nitrogen dioxide exposure | 1.70E-08    | –                | 29410382    | Maternal overweight/obesity                                                                                                                     | 5.40E-09    | –                | 29016858           |
| <i>TRIM50</i> | Nitrogen dioxide exposure | 1.70E-08    | –                | 29410382    | Maternal overweight/obesity                                                                                                                     | 1.00E-08    | –                | 29016858           |
| <i>ADAD1</i>  | Nitrogen dioxide exposure | 1.70E-08    | –                | 29410382    | Maternal overweight/obesity                                                                                                                     | 1.90E-08    | –                | 29016858           |
| <i>ITGA7</i>  | Nitrogen dioxide exposure | 1.70E-08    | –                | 29410382    | Maternal overweight/obesity                                                                                                                     | 3.00E-08    | –                | 29016858           |
| <i>TRPM2</i>  | Nitrogen dioxide exposure | 1.70E-08    | –                | 29410382    | Maternal overweight/obesity, Glucose                                                                                                            | 4.00E-08    | –                | 29016858           |

| <b>Gene</b>         | <b>Trait1</b>                                     | <b>minP</b> | <b>Direction</b> | <b>PMID</b>        | <b>Trait2</b>                                | <b>minP</b> | <b>Direction</b> | <b>PMID</b>        |
|---------------------|---------------------------------------------------|-------------|------------------|--------------------|----------------------------------------------|-------------|------------------|--------------------|
| <i>COBL</i>         | Nitrogen dioxide exposure                         | 1.70E-08    | -                | 29410382           | Maternal overweight/obesity, 1-hour glucose  | 4.00E-08    | -                | 29016858, 33151971 |
| <i>HTA</i>          | Nitrogen dioxide exposure                         | 1.70E-08    | -                | 29410382           | Maternal overweight/obesity                  | 4.10E-08    | -                | 29016858           |
| <i>MYOF</i>         | Nitrogen dioxide exposure                         | 1.70E-08    | -                | 29410382           | Maternal overweight/obesity, 1-hour glucose  | 4.20E-08    | -                | 29016858, 33151971 |
| <i>AIM1L</i>        | Nitrogen dioxide exposure                         | 1.70E-08    | -                | 29410382           | Maternal overweight/obesity                  | 4.30E-08    | -                | 29016858           |
| <i>BLVRA</i>        | Nitrogen dioxide exposure                         | 1.70E-08    | -                | 29410382           | Maternal overweight/obesity                  | 4.60E-08    | -                | 29016858           |
| <i>NSD1</i>         | Nitrogen dioxide exposure                         | 1.70E-08    | -                | 29410382           | Maternal overweight/obesity                  | 4.60E-08    | -                | 29016858           |
| <i>GPR78</i>        | Nitrogen dioxide exposure                         | 1.70E-08    | -                | 29410382           | Maternal overweight/obesity, fasting glucose | 4.90E-08    | -                | 29016858, 31197173 |
| <i>LOC100188949</i> | Nitrogen dioxide exposure                         | 1.80E-08    | +                | 29410382           | Maternal overweight/obesity                  | 1.40E-11    | +                | 29016858           |
| <i>FBXO10</i>       | Nitrogen dioxide exposure                         | 1.80E-08    | -                | 29410382           | Maternal overweight/obesity                  | 1.10E-10    | -                | 29016858           |
| <i>AGPAT1</i>       | Air pollution exposure, Nitrogen dioxide exposure | 1.80E-08    | -                | 26731791, 29410382 | Maternal overweight/obesity                  | 3.00E-10    | -                | 29016858           |
| <i>SCGB1A1</i>      | Nitrogen dioxide exposure                         | 1.80E-08    | -                | 29410382           | Maternal overweight/obesity                  | 9.00E-10    | -                | 29016858           |
| <i>ROBO4</i>        | Nitrogen dioxide exposure                         | 1.80E-08    | -                | 29410382           | Maternal overweight/obesity                  | 1.20E-09    | -                | 29016858           |
| <i>UBE2U</i>        | Nitrogen dioxide exposure                         | 1.80E-08    | -                | 29410382           | Maternal overweight/obesity                  | 2.10E-09    | -                | 29016858           |
| <i>H1FOO</i>        | Nitrogen dioxide exposure                         | 1.80E-08    | -                | 29410382           | Maternal overweight/obesity                  | 3.00E-09    | -                | 29016858           |

| <b>Gene</b>          | <b>Trait1</b>                                     | <b>minP</b> | <b>Direction</b> | <b>PMID</b>        | <b>Trait2</b>                               | <b>minP</b> | <b>Direction</b> | <b>PMID</b>        |
|----------------------|---------------------------------------------------|-------------|------------------|--------------------|---------------------------------------------|-------------|------------------|--------------------|
| <i>SPTB</i>          | Nitrogen dioxide exposure                         | 1.80E-08    | -                | 29410382           | fasting glucose                             | 3.20E-09    | -                | 31197173           |
| <i>C10orf18</i>      | Nitrogen dioxide exposure                         | 1.80E-08    | +                | 29410382           | Maternal overweight/obesity                 | 7.20E-09    | +                | 29016858           |
| <i>ITGB7</i>         | Air pollution exposure, Nitrogen dioxide exposure | 1.80E-08    | +                | 26731791, 29410382 | Maternal overweight/obesity                 | 1.20E-08    | -                | 29016858           |
| <i>DPYSL2</i>        | Nitrogen dioxide exposure                         | 1.80E-08    | -                | 29410382           | Maternal overweight/obesity                 | 1.30E-08    | -                | 29016858           |
| <i>GJB4</i>          | Prenatal NO2 exposure, Nitrogen dioxide exposure  | 1.80E-08    | -                | 27448387, 29410382 | Maternal overweight/obesity                 | 1.50E-08    | -                | 29016858           |
| <i>PPP1R1A</i>       | Nitrogen dioxide exposure                         | 1.80E-08    | -                | 29410382           | Maternal overweight/obesity                 | 2.20E-08    | -                | 29016858           |
| <i>LHPP</i>          | Air pollution exposure, Nitrogen dioxide exposure | 1.80E-08    | -                | 26731791, 29410382 | Maternal overweight/obesity                 | 3.00E-08    | -                | 29016858           |
| <i>TSPYL6;ACY P2</i> | Air pollution exposure, Nitrogen dioxide exposure | 1.86E-08    | +                | 26731791, 29410382 | Maternal overweight/obesity                 | 1.90E-11    | -                | 29016858           |
| <i>WIPF1</i>         | Nitrogen dioxide exposure                         | 1.90E-08    | +                | 29410382           | Maternal overweight/obesity                 | 6.60E-10    | +                | 29016858           |
| <i>CAMP</i>          | Nitrogen dioxide exposure                         | 1.90E-08    | -                | 29410382           | Maternal overweight/obesity                 | 3.90E-09    | +                | 29016858           |
| <i>GABRD</i>         | Nitrogen dioxide exposure                         | 1.90E-08    | -                | 29410382           | Maternal overweight/obesity                 | 6.30E-09    | -                | 29016858           |
| <i>SLC45A4</i>       | Air pollution exposure, Nitrogen dioxide exposure | 1.90E-08    | -                | 26731791, 29410382 | Maternal overweight/obesity, 1-hour glucose | 1.20E-08    | -                | 29016858, 33151971 |
| <i>VPS52</i>         | Nitrogen dioxide exposure                         | 1.90E-08    | -                | 29410382           | Maternal overweight/obesity                 | 1.20E-08    | -                | 29016858           |

| <b>Gene</b>      | <b>Trait1</b>                                     | <b>minP</b> | <b>Direction</b> | <b>PMID</b>        | <b>Trait2</b>                                | <b>minP</b> | <b>Direction</b> | <b>PMID</b>        |
|------------------|---------------------------------------------------|-------------|------------------|--------------------|----------------------------------------------|-------------|------------------|--------------------|
| <i>C7orf41</i>   | Nitrogen dioxide exposure                         | 1.90E-08    | –                | 29410382           | Maternal overweight/obesity                  | 1.30E-08    | –                | 29016858           |
| <i>RABGGTA</i>   | Nitrogen dioxide exposure                         | 1.90E-08    | –                | 29410382           | Maternal overweight/obesity                  | 1.70E-08    | –                | 29016858           |
| <i>CCDC40</i>    | Nitrogen dioxide exposure                         | 2.00E-08    | –                | 29410382           | Maternal overweight/obesity                  | 2.10E-10    | –                | 29016858           |
| <i>MVP</i>       | Air pollution exposure, Nitrogen dioxide exposure | 2.00E-08    | –                | 26731791, 29410382 | Maternal overweight/obesity                  | 9.40E-10    | –                | 29016858           |
| <i>MEG3</i>      | Nitrogen dioxide exposure                         | 2.00E-08    | –                | 29410382           | Maternal overweight/obesity                  | 1.10E-09    | –                | 29016858           |
| <i>HPX</i>       | Nitrogen dioxide exposure                         | 2.00E-08    | –                | 29410382           | Maternal overweight/obesity                  | 1.70E-09    | –                | 29016858           |
| <i>CDH13</i>     | Nitrogen dioxide exposure                         | 2.00E-08    | –                | 29410382           | Maternal overweight/obesity, fasting glucose | 4.30E-09    | –                | 29016858, 31197173 |
| <i>SERPINA6</i>  | Nitrogen dioxide exposure                         | 2.00E-08    | –                | 29410382           | Maternal overweight/obesity                  | 4.60E-09    | –                | 29016858           |
| <i>KSRI</i>      | Nitrogen dioxide exposure                         | 2.00E-08    | –                | 29410382           | Maternal overweight/obesity                  | 3.90E-08    | –                | 29016858           |
| <i>CUX1</i>      | Air pollution exposure, Nitrogen dioxide exposure | 2.00E-08    | –                | 26731791, 29410382 | Maternal overweight/obesity                  | 4.80E-08    | –                | 29016858           |
| <i>EFNA1</i>     | Nitrogen dioxide exposure                         | 2.10E-08    | –                | 29410382           | Maternal overweight/obesity                  | 8.70E-10    | –                | 29016858           |
| <i>SAMD5</i>     | Nitrogen dioxide exposure                         | 2.10E-08    | –                | 29410382           | Maternal overweight/obesity                  | 1.10E-09    | –                | 29016858           |
| <i>C14orf180</i> | Nitrogen dioxide exposure                         | 2.10E-08    | –                | 29410382           | Maternal overweight/obesity                  | 4.00E-09    | –                | 29016858           |
| <i>PACSIN1</i>   | Air pollution exposure, Nitrogen dioxide exposure | 2.10E-08    | –                | 26731791, 29410382 | Maternal overweight/obesity, 1-hour glucose  | 1.30E-08    | –                | 29016858, 33151971 |

| <b>Gene</b>   | <b>Trait1</b>                                     | <b>minP</b> | <b>Direction</b> | <b>PMID</b>        | <b>Trait2</b>                                                                                                                                                                                                                                                                                                                                                 | <b>minP</b> | <b>Direction</b> | <b>PMID</b>        |
|---------------|---------------------------------------------------|-------------|------------------|--------------------|---------------------------------------------------------------------------------------------------------------------------------------------------------------------------------------------------------------------------------------------------------------------------------------------------------------------------------------------------------------|-------------|------------------|--------------------|
| <i>GPR35</i>  | Nitrogen dioxide exposure                         | 2.10E-08    | –                | 29410382           | Maternal overweight/obesity                                                                                                                                                                                                                                                                                                                                   | 2.50E-08    | –                | 29016858           |
| <i>SEMA6B</i> | Nitrogen dioxide exposure                         | 2.10E-08    | –                | 29410382           | Maternal overweight/obesity                                                                                                                                                                                                                                                                                                                                   | 3.00E-08    | –                | 29016858           |
| <i>GPR113</i> | Nitrogen dioxide exposure                         | 2.10E-08    | –                | 29410382           | Maternal overweight/obesity                                                                                                                                                                                                                                                                                                                                   | 4.20E-08    | –                | 29016858           |
| <i>FBXO2</i>  | Nitrogen dioxide exposure                         | 2.10E-08    | –                | 29410382           | Maternal overweight/obesity                                                                                                                                                                                                                                                                                                                                   | 4.80E-08    | –                | 29016858           |
| <i>TBL3</i>   | Air pollution exposure, Nitrogen dioxide exposure | 2.20E-08    | –                | 26731791, 29410382 | Change in maternal diastolic blood pressure across pregnancy, Change in maternal diastolic blood pressure between second and third trimester, Change in maternal systolic blood pressure across pregnancy, Change in maternal systolic blood pressure between second and third trimester, Maternal diastolic blood pressure, Maternal systolic blood pressure | 1.70E-15    | NA               | 32078381           |
| <i>CSTT</i>   | Nitrogen dioxide exposure                         | 2.20E-08    | –                | 29410382           | Maternal overweight/obesity                                                                                                                                                                                                                                                                                                                                   | 3.60E-11    | –                | 29016858           |
| <i>TTC13</i>  | Nitrogen dioxide exposure                         | 2.20E-08    | –                | 29410382           | Maternal overweight/obesity, 1-hour glucose                                                                                                                                                                                                                                                                                                                   | 1.20E-10    | –                | 29016858, 33151971 |

| <b>Gene</b>      | <b>Trait1</b>                                     | <b>minP</b> | <b>Direction</b> | <b>PMID</b>        | <b>Trait2</b>                                                                  | <b>minP</b> | <b>Direction</b> | <b>PMID</b>        |
|------------------|---------------------------------------------------|-------------|------------------|--------------------|--------------------------------------------------------------------------------|-------------|------------------|--------------------|
| <i>CDYL2</i>     | Nitrogen dioxide exposure                         | 2.20E-08    | -                | 29410382           | Maternal overweight/obesity                                                    | 2.40E-10    | -                | 29016858           |
| <i>MMP14</i>     | Nitrogen dioxide exposure                         | 2.20E-08    | -                | 29410382           | Maternal overweight/obesity                                                    | 2.50E-10    | -                | 29016858           |
| <i>HIF0</i>      | Nitrogen dioxide exposure                         | 2.20E-08    | -                | 29410382           | Maternal overweight/obesity, Diastolic Blood Pressure, Systolic Blood Pressure | 6.00E-10    | -                | 29016858, 29198723 |
| <i>A2ML1</i>     | Nitrogen dioxide exposure                         | 2.20E-08    | -                | 29410382           | Maternal overweight/obesity                                                    | 7.60E-10    | -                | 29016858           |
| <i>LYN</i>       | Nitrogen dioxide exposure                         | 2.20E-08    | +                | 29410382           | Maternal overweight/obesity                                                    | 1.50E-09    | +                | 29016858           |
| <i>C1orf159</i>  | Air pollution exposure, Nitrogen dioxide exposure | 2.20E-08    | -                | 26731791, 29410382 | Maternal overweight/obesity                                                    | 3.80E-09    | -                | 29016858           |
| <i>HOXB1</i>     | Nitrogen dioxide exposure                         | 2.20E-08    | -                | 29410382           | Maternal overweight/obesity                                                    | 2.10E-08    | -                | 29016858           |
| <i>CACNA1B</i>   | Nitrogen dioxide exposure                         | 2.20E-08    | -                | 29410382           | Maternal overweight/obesity                                                    | 2.90E-08    | -                | 29016858           |
| <i>ADCY5</i>     | Nitrogen dioxide exposure                         | 2.20E-08    | -                | 29410382           | Maternal overweight/obesity, 1-hour glucose                                    | 3.70E-08    | -                | 29016858, 33151971 |
| <i>KIF2B</i>     | Nitrogen dioxide exposure                         | 2.20E-08    | -                | 29410382           | Maternal overweight/obesity                                                    | 4.30E-08    | -                | 29016858           |
| <i>NTN5;SEC1</i> | Nitrogen dioxide exposure                         | 2.30E-08    | -                | 29410382           | Maternal overweight/obesity                                                    | 2.10E-11    | -                | 29016858           |
| <i>CHRN2</i>     | Nitrogen dioxide exposure                         | 2.30E-08    | -                | 29410382           | Maternal overweight/obesity                                                    | 1.80E-09    | -                | 29016858           |
| <i>SYN2</i>      | Nitrogen dioxide exposure                         | 2.30E-08    | -                | 29410382           | Maternal overweight/obesity                                                    | 4.10E-09    | -                | 29016858           |
| <i>DLC1</i>      | Nitrogen dioxide exposure                         | 2.30E-08    | -                | 29410382           | Maternal overweight/obesity                                                    | 6.10E-09    | -                | 29016858           |



| <b>Gene</b>     | <b>Trait1</b>                                     | <b>minP</b> | <b>Direction</b> | <b>PMID</b>        | <b>Trait2</b>                                | <b>minP</b> | <b>Direction</b> | <b>PMID</b>                  |
|-----------------|---------------------------------------------------|-------------|------------------|--------------------|----------------------------------------------|-------------|------------------|------------------------------|
| <i>DHCR7</i>    | Nitrogen dioxide exposure                         | 2.30E-08    | –                | 29410382           | Maternal overweight/obesity                  | 7.90E-09    | –                | 29016858                     |
| <i>GJA5</i>     | Nitrogen dioxide exposure                         | 2.30E-08    | –                | 29410382           | Maternal overweight/obesity                  | 8.00E-09    | –                | 29016858                     |
| <i>AJAPI</i>    | Nitrogen dioxide exposure                         | 2.30E-08    | –                | 29410382           | Maternal overweight/obesity, Triglycerides   | 9.70E-09    | –                | 29016858, 31910897, 32916427 |
| <i>DHDPSL</i>   | Nitrogen dioxide exposure                         | 2.30E-08    | –                | 29410382           | Maternal overweight/obesity                  | 2.40E-08    | –                | 29016858                     |
| <i>C14orf73</i> | Air pollution exposure, Nitrogen dioxide exposure | 2.30E-08    | –                | 26731791, 29410382 | Maternal overweight/obesity                  | 2.90E-08    | –                | 29016858                     |
| <i>EXPH5</i>    | Nitrogen dioxide exposure                         | 2.40E-08    | –                | 29410382           | Maternal overweight/obesity                  | 4.30E-15    | –                | 29016858                     |
| <i>MFAP2</i>    | Nitrogen dioxide exposure                         | 2.40E-08    | –                | 29410382           | Maternal overweight/obesity                  | 2.80E-10    | –                | 29016858                     |
| <i>HLA-L</i>    | Nitrogen dioxide exposure                         | 2.40E-08    | –                | 29410382           | Maternal overweight/obesity                  | 7.40E-10    | –                | 29016858                     |
| <i>WISP3</i>    | Nitrogen dioxide exposure                         | 2.40E-08    | –                | 29410382           | Maternal overweight/obesity                  | 3.00E-09    | –                | 29016858                     |
| <i>LRP1</i>     | Air pollution exposure, Nitrogen dioxide exposure | 2.40E-08    | –                | 26731791, 29410382 | Maternal overweight/obesity                  | 3.40E-09    | –                | 29016858                     |
| <i>TTC38</i>    | Nitrogen dioxide exposure                         | 2.40E-08    | –                | 29410382           | Maternal overweight/obesity, fasting glucose | 4.30E-09    | –                | 29016858, 31197173           |
| <i>AMZ1</i>     | Air pollution exposure, Nitrogen dioxide exposure | 2.40E-08    | –                | 26731791, 29410382 | Maternal overweight/obesity                  | 7.70E-09    | –                | 29016858                     |

| <b>Gene</b>         | <b>Trait1</b>                                     | <b>minP</b> | <b>Direction</b> | <b>PMID</b>        | <b>Trait2</b>               | <b>minP</b> | <b>Direction</b> | <b>PMID</b> |
|---------------------|---------------------------------------------------|-------------|------------------|--------------------|-----------------------------|-------------|------------------|-------------|
| <i>FAM129B</i>      | Nitrogen dioxide exposure                         | 2.40E-08    | -                | 29410382           | Maternal obesity            | 1.39E-08    | -                | 25855720    |
| <i>TGM6</i>         | Nitrogen dioxide exposure                         | 2.40E-08    | -                | 29410382           | Maternal overweight/obesity | 1.40E-08    | -                | 29016858    |
| <i>KRT35</i>        | Nitrogen dioxide exposure                         | 2.40E-08    | -                | 29410382           | Maternal overweight/obesity | 2.70E-08    | -                | 29016858    |
| <i>BPHL</i>         | Air pollution exposure, Nitrogen dioxide exposure | 2.40E-08    | -                | 26731791, 29410382 | Maternal overweight/obesity | 3.00E-08    | -                | 29016858    |
| <i>BMP6</i>         | Nitrogen dioxide exposure                         | 2.50E-08    | -                | 29410382           | Maternal overweight/obesity | 3.30E-12    | -                | 29016858    |
| <i>SPATA13</i>      | Nitrogen dioxide exposure                         | 2.50E-08    | -                | 29410382           | Maternal overweight/obesity | 2.80E-10    | -                | 29016858    |
| <i>LIN7A;MIR617</i> | Nitrogen dioxide exposure                         | 2.50E-08    | -                | 29410382           | Maternal overweight/obesity | 7.90E-10    | -                | 29016858    |
| <i>THBS2</i>        | Nitrogen dioxide exposure                         | 2.50E-08    | -                | 29410382           | Maternal overweight/obesity | 1.70E-09    | -                | 29016858    |
| <i>NRP2</i>         | Nitrogen dioxide exposure                         | 2.50E-08    | -                | 29410382           | Maternal overweight/obesity | 2.60E-09    | -                | 29016858    |
| <i>BMP1</i>         | Air pollution exposure, Nitrogen dioxide exposure | 2.50E-08    | -                | 26731791, 29410382 | Maternal overweight/obesity | 1.50E-08    | -                | 29016858    |
| <i>ANK1</i>         | Nitrogen dioxide exposure                         | 2.50E-08    | -                | 29410382           | Maternal overweight/obesity | 2.80E-08    | +                | 29016858    |
| <i>GPT2</i>         | Nitrogen dioxide exposure                         | 2.60E-08    | -                | 29410382           | Maternal overweight/obesity | 1.90E-09    | -                | 29016858    |
| <i>MIR377</i>       | Nitrogen dioxide exposure                         | 2.60E-08    | -                | 29410382           | Maternal overweight/obesity | 4.10E-09    | -                | 29016858    |
| <i>MYLK4</i>        | Nitrogen dioxide exposure                         | 2.60E-08    | -                | 29410382           | Maternal overweight/obesity | 2.40E-08    | -                | 29016858    |
| <i>APOL6</i>        | Nitrogen dioxide exposure                         | 2.60E-08    | +                | 29410382           | Maternal overweight/obesity | 4.10E-08    | +                | 29016858    |

| <b>Gene</b>         | <b>Trait1</b>                                     | <b>minP</b> | <b>Direction</b> | <b>PMID</b>        | <b>Trait2</b>                                                                  | <b>minP</b> | <b>Direction</b> | <b>PMID</b>        |
|---------------------|---------------------------------------------------|-------------|------------------|--------------------|--------------------------------------------------------------------------------|-------------|------------------|--------------------|
| <i>LOC100132354</i> | Air pollution exposure, Nitrogen dioxide exposure | 2.70E-08    | -                | 26731791, 29410382 | Maternal overweight/obesity, Diastolic Blood Pressure, Systolic Blood Pressure | 2.20E-21    | -                | 29016858, 29198723 |
| <i>ACSL6</i>        | Nitrogen dioxide exposure                         | 2.70E-08    | -                | 29410382           | Maternal overweight/obesity                                                    | 9.20E-11    | -                | 29016858           |
| <i>WNT8A</i>        | Air pollution exposure, Nitrogen dioxide exposure | 2.70E-08    | -                | 26731791, 29410382 | Maternal overweight/obesity                                                    | 1.20E-08    | -                | 29016858           |
| <i>CORO2A</i>       | Nitrogen dioxide exposure                         | 2.70E-08    | -                | 29410382           | Maternal overweight/obesity, fasting glucose                                   | 1.40E-08    | -                | 29016858, 31197173 |
| <i>COL23A1</i>      | Nitrogen dioxide exposure                         | 2.70E-08    | -                | 29410382           | Maternal overweight/obesity                                                    | 1.50E-08    | -                | 29016858           |
| <i>FAM170B</i>      | Nitrogen dioxide exposure                         | 2.70E-08    | -                | 29410382           | Maternal overweight/obesity                                                    | 2.50E-08    | -                | 29016858           |
| <i>ERI3</i>         | Nitrogen dioxide exposure                         | 2.70E-08    | -                | 29410382           | Maternal overweight/obesity                                                    | 4.30E-08    | -                | 29016858           |
| <i>PRAGMIN</i>      | Air pollution exposure, Nitrogen dioxide exposure | 2.80E-08    | +                | 26731791, 29410382 | Maternal overweight/obesity                                                    | 1.70E-09    | -                | 29016858           |
| <i>BRUNOLA</i>      | Nitrogen dioxide exposure                         | 2.80E-08    | -                | 29410382           | Maternal overweight/obesity                                                    | 5.10E-09    | -                | 29016858           |
| <i>IL12A</i>        | Nitrogen dioxide exposure                         | 2.80E-08    | -                | 29410382           | Maternal overweight/obesity                                                    | 6.80E-09    | -                | 29016858           |
| <i>BRSK1</i>        | Nitrogen dioxide exposure                         | 2.80E-08    | -                | 29410382           | Maternal overweight/obesity, Triglycerides, Triglycerides in small HDL         | 1.20E-08    | -                | 29016858           |
| <i>MRAP</i>         | Nitrogen dioxide exposure                         | 2.80E-08    | -                | 29410382           | Maternal overweight/obesity                                                    | 1.80E-08    | -                | 29016858           |

| <b>Gene</b>                  | <b>Trait1</b>                                     | <b>minP</b> | <b>Direction</b> | <b>PMID</b>        | <b>Trait2</b>                                                                                       | <b>minP</b> | <b>Direction</b> | <b>PMID</b> |
|------------------------------|---------------------------------------------------|-------------|------------------|--------------------|-----------------------------------------------------------------------------------------------------|-------------|------------------|-------------|
| <i>CNTNAP1</i>               | Nitrogen dioxide exposure                         | 2.80E-08    | –                | 29410382           | Maternal overweight/obesity                                                                         | 2.30E-08    | –                | 29016858    |
| <i>ACSF2</i>                 | Nitrogen dioxide exposure                         | 2.80E-08    | –                | 29410382           | Maternal overweight/obesity                                                                         | 4.40E-08    | –                | 29016858    |
| <i>UNC5B</i>                 | Nitrogen dioxide exposure                         | 2.90E-08    | –                | 29410382           | Maternal overweight/obesity                                                                         | 8.70E-11    | –                | 29016858    |
| <i>TRPM5</i>                 | Nitrogen dioxide exposure                         | 2.90E-08    | –                | 29410382           | Maternal overweight/obesity, Triglycerides in HDL, Triglycerides to total lipids ratio in large HDL | 1.50E-10    | –                | 29016858    |
| <i>LRRN1</i>                 | Air pollution exposure, Nitrogen dioxide exposure | 2.90E-08    | –                | 26731791, 29410382 | Maternal overweight/obesity                                                                         | 4.10E-10    | –                | 29016858    |
| <i>SLC6A3</i>                | Nitrogen dioxide exposure                         | 2.90E-08    | –                | 29410382           | Maternal overweight/obesity                                                                         | 5.30E-10    | –                | 29016858    |
| <i>TMEM176B</i>              | Nitrogen dioxide exposure                         | 2.90E-08    | –                | 29410382           | Maternal overweight/obesity                                                                         | 7.50E-10    | –                | 29016858    |
| <i>MIR200A;MIR429</i>        | Nitrogen dioxide exposure                         | 2.90E-08    | –                | 29410382           | Maternal overweight/obesity                                                                         | 1.60E-09    | –                | 29016858    |
| <i>CYFIP1</i>                | Nitrogen dioxide exposure                         | 2.90E-08    | –                | 29410382           | Maternal overweight/obesity                                                                         | 7.80E-09    | –                | 29016858    |
| <i>MIR642;GIPR</i>           | Nitrogen dioxide exposure                         | 2.90E-08    | –                | 29410382           | Maternal overweight/obesity                                                                         | 2.60E-08    | –                | 29016858    |
| <i>CST9L</i>                 | Nitrogen dioxide exposure                         | 2.90E-08    | –                | 29410382           | Maternal overweight/obesity                                                                         | 3.40E-08    | –                | 29016858    |
| <i>IARS2;MIR194-1;MIR215</i> | Nitrogen dioxide exposure                         | 2.90E-08    | –                | 29410382           | Maternal overweight/obesity                                                                         | 4.40E-08    | –                | 29016858    |
| <i>GPR61</i>                 | Nitrogen dioxide exposure                         | 3.00E-08    | –                | 29410382           | Maternal overweight/obesity                                                                         | 6.50E-13    | –                | 29016858    |

| <b>Gene</b>    | <b>Trait1</b>                                     | <b>minP</b> | <b>Direction</b> | <b>PMID</b>        | <b>Trait2</b>                                                                 | <b>minP</b> | <b>Direction</b> | <b>PMID</b>                  |
|----------------|---------------------------------------------------|-------------|------------------|--------------------|-------------------------------------------------------------------------------|-------------|------------------|------------------------------|
| <i>VWF</i>     | Nitrogen dioxide exposure                         | 3.00E-08    | –                | 29410382           | Maternal overweight/obesity, 1-hour glucose                                   | 6.20E-11    | –                | 29016858, 33151971           |
| <i>VPS13D</i>  | Nitrogen dioxide exposure                         | 3.00E-08    | –                | 29410382           | Maternal overweight/obesity, fasting glucose                                  | 1.60E-10    | –                | 29016858, 31197173           |
| <i>CHCHD6</i>  | Nitrogen dioxide exposure                         | 3.00E-08    | –                | 29410382           | Maternal overweight/obesity                                                   | 1.10E-09    | –                | 29016858                     |
| <i>FGGY</i>    | Nitrogen dioxide exposure                         | 3.00E-08    | –                | 29410382           | Maternal overweight/obesity                                                   | 1.60E-09    | –                | 29016858                     |
| <i>PEX14</i>   | Nitrogen dioxide exposure                         | 3.00E-08    | –                | 29410382           | Maternal overweight/obesity                                                   | 6.50E-09    | –                | 29016858                     |
| <i>ESYT3</i>   | Nitrogen dioxide exposure                         | 3.00E-08    | –                | 29410382           | Maternal overweight/obesity                                                   | 1.30E-08    | –                | 29016858                     |
| <i>GYLTL1B</i> | Nitrogen dioxide exposure                         | 3.00E-08    | –                | 29410382           | Maternal overweight/obesity                                                   | 3.00E-08    | –                | 29016858                     |
| <i>BAIAP2</i>  | Air pollution exposure, Nitrogen dioxide exposure | 3.10E-08    | –                | 26731791, 29410382 | Maternal overweight/obesity, Triglycerides to total lipids ratio in small HDL | 1.30E-10    | –                | 29016858                     |
| <i>ERGIC1</i>  | Nitrogen dioxide exposure                         | 3.10E-08    | –                | 29410382           | Maternal overweight/obesity                                                   | 9.80E-10    | –                | 29016858                     |
| <i>ZDHHC14</i> | Air pollution exposure, Nitrogen dioxide exposure | 3.10E-08    | –                | 26731791, 29410382 | Diastolic Blood Pressure, Systolic Blood Pressure, Triglycerides              | 2.60E-08    | –                | 29198723, 31910897           |
| <i>PRR5L</i>   | Air pollution exposure, Nitrogen dioxide exposure | 3.20E-08    | –                | 26731791, 29410382 | Maternal overweight/obesity, fasting glucose, 1-hour glucose                  | 2.60E-12    | –                | 29016858, 31197173, 33151971 |

| <b>Gene</b>     | <b>Trait1</b>             | <b>minP</b> | <b>Direction</b> | <b>PMID</b> | <b>Trait2</b>                                                       | <b>minP</b> | <b>Direction</b> | <b>PMID</b>        |
|-----------------|---------------------------|-------------|------------------|-------------|---------------------------------------------------------------------|-------------|------------------|--------------------|
| <i>BCAM</i>     | Nitrogen dioxide exposure | 3.20E-08    | -                | 29410382    | Maternal overweight/obesity, 1-hour glucose                         | 2.20E-11    | -                | 29016858, 33151971 |
| <i>ASB14</i>    | Nitrogen dioxide exposure | 3.20E-08    | -                | 29410382    | Maternal overweight/obesity                                         | 8.20E-11    | -                | 29016858           |
| <i>CYFIP2</i>   | Nitrogen dioxide exposure | 3.20E-08    | +                | 29410382    | Maternal overweight/obesity                                         | 7.60E-09    | +                | 29016858           |
| <i>LOXL1</i>    | Nitrogen dioxide exposure | 3.20E-08    | -                | 29410382    | Maternal overweight/obesity                                         | 2.30E-08    | -                | 29016858           |
| <i>KLHL26</i>   | Nitrogen dioxide exposure | 3.30E-08    | -                | 29410382    | Maternal overweight/obesity                                         | 3.80E-10    | -                | 29016858           |
| <i>CAMK2B</i>   | Nitrogen dioxide exposure | 3.30E-08    | -                | 29410382    | Maternal diastolic blood pressure, Maternal systolic blood pressure | 2.20E-08    | NA               | 32078381           |
| <i>CDC42EP3</i> | Nitrogen dioxide exposure | 3.30E-08    | -                | 29410382    | Maternal overweight/obesity                                         | 3.10E-08    | -                | 29016858           |
| <i>GRAMD1B</i>  | Nitrogen dioxide exposure | 3.40E-08    | -                | 29410382    | Maternal overweight/obesity                                         | 7.80E-12    | -                | 29016858           |
| <i>MPZ</i>      | Nitrogen dioxide exposure | 3.40E-08    | -                | 29410382    | Maternal overweight/obesity                                         | 3.20E-11    | -                | 29016858           |
| <i>AVPR1B</i>   | Nitrogen dioxide exposure | 3.40E-08    | -                | 29410382    | Maternal overweight/obesity                                         | 1.50E-09    | -                | 29016858           |
| <i>SLC28A1</i>  | Nitrogen dioxide exposure | 3.40E-08    | -                | 29410382    | Maternal overweight/obesity                                         | 8.90E-09    | -                | 29016858           |
| <i>SLC2A2</i>   | Nitrogen dioxide exposure | 3.40E-08    | -                | 29410382    | Maternal overweight/obesity                                         | 1.80E-08    | -                | 29016858           |
| <i>PAX5</i>     | Nitrogen dioxide exposure | 3.40E-08    | -                | 29410382    | Maternal overweight/obesity                                         | 2.00E-08    | -                | 29016858           |
| <i>SOX6</i>     | Nitrogen dioxide exposure | 3.40E-08    | +                | 29410382    | Maternal overweight/obesity                                         | 3.90E-08    | +                | 29016858           |

| <b>Gene</b>    | <b>Trait1</b>             | <b>minP</b> | <b>Direction</b> | <b>PMID</b> | <b>Trait2</b>                                                                                   | <b>minP</b> | <b>Direction</b> | <b>PMID</b>                  |
|----------------|---------------------------|-------------|------------------|-------------|-------------------------------------------------------------------------------------------------|-------------|------------------|------------------------------|
| <i>NR4A1</i>   | Nitrogen dioxide exposure | 3.50E-08    | -                | 29410382    | Maternal overweight/obesity                                                                     | 5.20E-09    | -                | 29016858                     |
| <i>GNG2</i>    | Nitrogen dioxide exposure | 3.50E-08    | +                | 29410382    | Maternal overweight/obesity                                                                     | 1.20E-08    | -                | 29016858                     |
| <i>MAP3K6</i>  | Nitrogen dioxide exposure | 3.60E-08    | -                | 29410382    | Maternal overweight/obesity                                                                     | 2.10E-10    | -                | 29016858                     |
| <i>FMO3</i>    | Nitrogen dioxide exposure | 3.60E-08    | -                | 29410382    | Maternal overweight/obesity                                                                     | 6.60E-10    | -                | 29016858                     |
| <i>SFRP1</i>   | Nitrogen dioxide exposure | 3.60E-08    | -                | 29410382    | Maternal overweight/obesity                                                                     | 2.50E-09    | -                | 29016858                     |
| <i>ZBTB7B</i>  | Nitrogen dioxide exposure | 3.60E-08    | +                | 29410382    | Maternal overweight/obesity, Diastolic Blood Pressure, Systolic Blood Pressure, fasting glucose | 8.40E-09    | +                | 29016858, 29198723, 31197173 |
| <i>RSAD1</i>   | Nitrogen dioxide exposure | 3.70E-08    | -                | 29410382    | Maternal overweight/obesity                                                                     | 3.10E-09    | -                | 29016858                     |
| <i>VSIG2</i>   | Nitrogen dioxide exposure | 3.70E-08    | -                | 29410382    | Maternal overweight/obesity                                                                     | 1.40E-08    | -                | 29016858                     |
| <i>TRPV4</i>   | Nitrogen dioxide exposure | 3.70E-08    | -                | 29410382    | Maternal overweight/obesity                                                                     | 3.50E-08    | -                | 29016858                     |
| <i>PCSK6</i>   | Nitrogen dioxide exposure | 3.80E-08    | -                | 29410382    | Serum triglycerides, Maternal overweight/obesity                                                | 4.90E-13    | -                | 28173150, 29016858           |
| <i>AP3B2</i>   | Nitrogen dioxide exposure | 3.80E-08    | -                | 29410382    | Maternal overweight/obesity                                                                     | 1.50E-12    | -                | 29016858                     |
| <i>LRRFIP1</i> | Nitrogen dioxide exposure | 3.80E-08    | -                | 29410382    | Maternal overweight/obesity, 1-hour glucose, Triglycerides to total lipids ratio in medium VLDL | 1.30E-10    | -                | 29016858, 33151971           |

| <b>Gene</b>              | <b>Trait1</b>             | <b>minP</b> | <b>Direction</b> | <b>PMID</b> | <b>Trait2</b>                                     | <b>minP</b> | <b>Direction</b> | <b>PMID</b> |
|--------------------------|---------------------------|-------------|------------------|-------------|---------------------------------------------------|-------------|------------------|-------------|
| <i>CTCF</i>              | Nitrogen dioxide exposure | 3.80E-08    | -                | 29410382    | Maternal overweight/obesity                       | 4.00E-09    | -                | 29016858    |
| <i>RNU5E;RNU5D;CKMT2</i> | Nitrogen dioxide exposure | 3.80E-08    | -                | 29410382    | Maternal overweight/obesity                       | 2.70E-08    | -                | 29016858    |
| <i>C17orf101</i>         | Nitrogen dioxide exposure | 3.80E-08    | -                | 29410382    | Maternal overweight/obesity                       | 4.70E-08    | -                | 29016858    |
| <i>JDP2</i>              | Nitrogen dioxide exposure | 3.90E-08    | -                | 29410382    | Diastolic Blood Pressure, Systolic Blood Pressure | 4.80E-10    | -                | 29198723    |
| <i>MS4A15</i>            | Nitrogen dioxide exposure | 3.90E-08    | -                | 29410382    | Maternal overweight/obesity                       | 1.20E-09    | -                | 29016858    |
| <i>KCNK3</i>             | Nitrogen dioxide exposure | 3.90E-08    | -                | 29410382    | Maternal overweight/obesity                       | 1.30E-08    | -                | 29016858    |
| <i>ORIG1</i>             | Nitrogen dioxide exposure | 3.90E-08    | -                | 29410382    | Maternal overweight/obesity                       | 2.30E-08    | -                | 29016858    |
| <i>UPK2</i>              | Nitrogen dioxide exposure | 4.00E-08    | -                | 29410382    | Maternal overweight/obesity                       | 7.90E-11    | -                | 29016858    |
| <i>DLGAP1</i>            | Nitrogen dioxide exposure | 4.00E-08    | -                | 29410382    | Maternal overweight/obesity                       | 1.80E-09    | -                | 29016858    |
| <i>CTNND2</i>            | Nitrogen dioxide exposure | 4.00E-08    | -                | 29410382    | Maternal overweight/obesity                       | 3.60E-09    | -                | 29016858    |
| <i>ARHGEF16</i>          | Nitrogen dioxide exposure | 4.00E-08    | -                | 29410382    | Maternal overweight/obesity                       | 1.10E-08    | -                | 29016858    |
| <i>GIF</i>               | Nitrogen dioxide exposure | 4.00E-08    | -                | 29410382    | Maternal overweight/obesity                       | 1.40E-08    | -                | 29016858    |
| <i>FYN</i>               | Nitrogen dioxide exposure | 4.00E-08    | +                | 29410382    | Maternal overweight/obesity                       | 4.50E-08    | +                | 29016858    |
| <i>CMTM2</i>             | Nitrogen dioxide exposure | 4.10E-08    | -                | 29410382    | Maternal overweight/obesity                       | 6.90E-12    | -                | 29016858    |
| <i>TRAF1</i>             | Nitrogen dioxide exposure | 4.10E-08    | +                | 29410382    | Maternal overweight/obesity                       | 7.80E-10    | +                | 29016858    |



| <b>Gene</b>      | <b>Trait1</b>                                    | <b>minP</b> | <b>Direction</b> | <b>PMID</b>        | <b>Trait2</b>                                                | <b>minP</b> | <b>Direction</b> | <b>PMID</b>        |
|------------------|--------------------------------------------------|-------------|------------------|--------------------|--------------------------------------------------------------|-------------|------------------|--------------------|
| <i>PRSS21</i>    | Nitrogen dioxide exposure                        | 4.10E-08    | -                | 29410382           | Maternal overweight/obesity                                  | 6.00E-09    | -                | 29016858           |
| <i>MICA</i>      | Prenatal NO2 exposure, Nitrogen dioxide exposure | 4.10E-08    | -                | 27448387, 29410382 | Maternal overweight/obesity, triglycerides                   | 9.00E-09    | -                | 29016858, 32677467 |
| <i>SEC14L1</i>   | Nitrogen dioxide exposure                        | 4.20E-08    | -                | 29410382           | Maternal overweight/obesity                                  | 3.30E-10    | -                | 29016858           |
| <i>BOC</i>       | Nitrogen dioxide exposure                        | 4.20E-08    | -                | 29410382           | Maternal overweight/obesity                                  | 5.70E-09    | -                | 29016858           |
| <i>LOC646498</i> | Nitrogen dioxide exposure                        | 4.20E-08    | -                | 29410382           | Maternal overweight/obesity                                  | 2.10E-08    | -                | 29016858           |
| <i>BIN2</i>      | Nitrogen dioxide exposure                        | 4.20E-08    | +                | 29410382           | Maternal overweight/obesity                                  | 3.20E-08    | +                | 29016858           |
| <i>CMYA5</i>     | Nitrogen dioxide exposure                        | 4.20E-08    | -                | 29410382           | Maternal overweight/obesity                                  | 3.50E-08    | -                | 29016858           |
| <i>FMNL2</i>     | Nitrogen dioxide exposure                        | 4.30E-08    | -                | 29410382           | Maternal overweight/obesity                                  | 5.10E-11    | -                | 29016858           |
| <i>NCKAP5</i>    | Nitrogen dioxide exposure                        | 4.30E-08    | -                | 29410382           | Maternal overweight/obesity, Triglycerides in very large HDL | 9.80E-10    | -                | 29016858           |
| <i>ZNF488</i>    | Nitrogen dioxide exposure                        | 4.30E-08    | -                | 29410382           | Maternal overweight/obesity, 1-hour glucose                  | 3.60E-08    | -                | 29016858, 33151971 |
| <i>TRIO</i>      | Nitrogen dioxide exposure                        | 4.30E-08    | -                | 29410382           | Maternal overweight/obesity                                  | 4.90E-08    | -                | 29016858           |
| <i>ADAM30</i>    | Nitrogen dioxide exposure                        | 4.40E-08    | -                | 29410382           | Maternal overweight/obesity, Triglycerides                   | 1.80E-10    | -                | 29016858           |
| <i>ITIH5</i>     | Nitrogen dioxide exposure                        | 4.40E-08    | -                | 29410382           | Maternal overweight/obesity                                  | 8.00E-09    | -                | 29016858           |

| <b>Gene</b>      | <b>Trait1</b>             | <b>minP</b> | <b>Direction</b> | <b>PMID</b> | <b>Trait2</b>                                           | <b>minP</b> | <b>Direction</b> | <b>PMID</b>        |
|------------------|---------------------------|-------------|------------------|-------------|---------------------------------------------------------|-------------|------------------|--------------------|
| <i>PAPSS1</i>    | Nitrogen dioxide exposure | 4.40E-08    | -                | 29410382    | Maternal overweight/obesity                             | 1.20E-08    | -                | 29016858           |
| <i>LOC727677</i> | Nitrogen dioxide exposure | 4.50E-08    | +                | 29410382    | Maternal overweight/obesity                             | 1.40E-10    | +                | 29016858           |
| <i>BMPER</i>     | Nitrogen dioxide exposure | 4.50E-08    | -                | 29410382    | Maternal overweight/obesity                             | 1.50E-10    | -                | 29016858           |
| <i>TNKS1BP1</i>  | Nitrogen dioxide exposure | 4.50E-08    | -                | 29410382    | Maternal overweight/obesity                             | 9.30E-10    | -                | 29016858, 32916427 |
| <i>RHO</i>       | Nitrogen dioxide exposure | 4.50E-08    | -                | 29410382    | Maternal overweight/obesity                             | 1.10E-09    | -                | 29016858           |
| <i>XIRP1</i>     | Nitrogen dioxide exposure | 4.50E-08    | -                | 29410382    | Maternal overweight/obesity, fasting glucose            | 1.90E-09    | -                | 29016858, 31197173 |
| <i>HLA-DRA</i>   | Nitrogen dioxide exposure | 4.50E-08    | -                | 29410382    | Maternal overweight/obesity                             | 1.10E-08    | -                | 29016858           |
| <i>BFSP2</i>     | Nitrogen dioxide exposure | 4.50E-08    | -                | 29410382    | Maternal overweight/obesity                             | 1.40E-08    | -                | 29016858           |
| <i>DENND2D</i>   | Nitrogen dioxide exposure | 4.50E-08    | +                | 29410382    | Maternal overweight/obesity                             | 2.30E-08    | +                | 29016858           |
| <i>RETNLB</i>    | Nitrogen dioxide exposure | 4.60E-08    | -                | 29410382    | Maternal overweight/obesity                             | 5.20E-10    | -                | 29016858           |
| <i>SSPO</i>      | Nitrogen dioxide exposure | 4.60E-08    | -                | 29410382    | Maternal overweight/obesity                             | 2.10E-08    | -                | 29016858           |
| <i>NTRK1</i>     | Nitrogen dioxide exposure | 4.70E-08    | -                | 29410382    | Maternal overweight/obesity                             | 1.70E-10    | -                | 29016858           |
| <i>AK5</i>       | Nitrogen dioxide exposure | 4.70E-08    | -                | 29410382    | Maternal overweight/obesity, Triglycerides in large HDL | 3.90E-09    | -                | 29016858           |

| <b>Gene</b>                 | <b>Trait1</b>                                                                     | <b>minP</b> | <b>Direction</b> | <b>PMID</b>                  | <b>Trait2</b>                                               | <b>minP</b> | <b>Direction</b> | <b>PMID</b>                  |
|-----------------------------|-----------------------------------------------------------------------------------|-------------|------------------|------------------------------|-------------------------------------------------------------|-------------|------------------|------------------------------|
| <i>TRPV1</i>                | Nitrogen dioxide exposure                                                         | 4.70E-08    | –                | 29410382                     | Maternal overweight/obesity, fasting glucose, Triglycerides | 9.10E-09    | –                | 29016858, 31197173, 31910897 |
| <i>CDH22</i>                | Nitrogen dioxide exposure, Particulate matter air pollution                       | 4.70E-08    | –                | 29410382, 32484729           | Maternal overweight/obesity, fasting glucose                | 1.20E-08    | –                | 29016858, 31197173           |
| <i>LOC149134</i>            | Nitrogen dioxide exposure                                                         | 4.70E-08    | –                | 29410382                     | Maternal overweight/obesity                                 | 2.70E-08    | –                | 29016858                     |
| <i>SH3TC1</i>               | Nitrogen dioxide exposure, Particulate matter ≤10 um (PM10)                       | 4.80E-08    | –                | 29410382, 31208937           | Maternal overweight/obesity                                 | 1.70E-08    | –                | 29016858                     |
| <i>KCNIP3</i>               | Nitrogen dioxide exposure                                                         | 4.80E-08    | –                | 29410382                     | Maternal overweight/obesity                                 | 3.60E-08    | –                | 29016858                     |
| <i>RNF213;LO C100294362</i> | Air pollution exposure, Nitrogen dioxide exposure, Nitrogen dioxide air pollution | 4.80E-08    | –                | 26731791, 29410382, 32484729 | Maternal overweight/obesity                                 | 3.70E-08    | –                | 29016858                     |
| <i>GALM</i>                 | Nitrogen dioxide exposure                                                         | 4.90E-08    | –                | 29410382                     | Maternal overweight/obesity                                 | 4.60E-09    | –                | 29016858                     |
| <i>SH2D6</i>                | Nitrogen dioxide exposure                                                         | 4.90E-08    | –                | 29410382                     | Maternal overweight/obesity                                 | 3.20E-08    | –                | 29016858                     |

Minimum P value of methylation sites on each gene is given (minP), alongside with its corresponding effect direction. All results are from whole/cord blood samples. AP: Air Pollution; PM: Particulate Matter.
